# Supplementary material for: Spring water anomalies before two consecutive earthquakes (Mw 7.7 and Mw 7.6) in Kahramanmaraş (Türkiye) on 6 February 2023
Source: Copernicus journal article supplement (doi:10.5194/nhess-2023-133), 2023-08-01
Supplement: Supplementary file [file nhess-2023-133-AC3-supplement.pdf]

T.C.  
OSMANİYE VALİLİĞİ  
İL SAĞLIK MÜDÜRLÜĞÜ

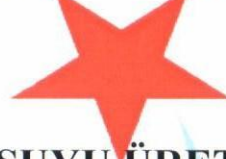

KAYNAK SUYU ÜRETİM İZNİ

|                |                                                                                                    |               |                                                                                                                     |
|----------------|----------------------------------------------------------------------------------------------------|---------------|---------------------------------------------------------------------------------------------------------------------|
| Ticari ismi    | : AYRAN SU                                                                                         | Ruhsat No     | : KS.80.09                                                                                                          |
| Sahibi         | : Ayran Su Sanayi ve Ticaret A. Ş.                                                                 | Ruhsat Tarihi | : 29.08.2012                                                                                                        |
| İşleticisi     | : Ayran Su Sanayi ve Ticaret A. Ş.                                                                 | Kaptaj Adedi  | : 1                                                                                                                 |
| İşletme Adresi | : Gökmustafalı Köyü D-400 Karayolu Üzeri<br>293 Ada 117 Parsel Bahçe İlçesi / OSMANİYE             | Debisi        | : 3.8 L/sn                                                                                                          |
| Kaynak Adresi  | : A.Aricaklı Köyü Ayranikizharman Mah. Ayran mevkii<br>376 Ada ve 3 Parsel Bahçe İlçesi / OSMANİYE | İmla Şekli    | : 19 L. Polikarbonat Damacana,<br>0.2-0.33-0.4-0.5-1-1.2-1.5-5-10-17-19 L. Pet Şişe,<br>200-250-300 ml. Pet Bardak. |

Bu Kaynak Suyu Üretim İzni T.C. SAĞLIK BAKANLIĞI tarafından 17.02.2005 tarihli ve 25730 sayılı Resmi Gazete'de yayımlanan "İnsani Tüketim Amaçlı Sular Hakkında Yönetmelik" hükümlerine göre düzenlenmiştir.

Düzenleme Tarihi:

- 17.10.2017 tarihinde 17 L. Pet Şişe ilavesi yapılmıştır.

T.C. Sağlık Bakanlığı

Muammer BALCI  
Vali a.  
Vali Yardımcısı

T.C.  
OSMANIYE VALİLİĞİ  
İl Sağlık Müdürlüğü

**KAYNAK SUYU ÜRETİM İZİNİNE ESAS ANALİZ SERTİFİKASI**

Ruhsat No : KS.80.09

Tarih : 29.08.2012

Düzenleme Tarihi : 17.10.2017

**KAYNAK SUYUNUN**

Ticari Adı : AYRAN SU

Kaynak Adedi: 1 (Bir)

İşletme Adresi: Gökmustafalı Köyü D-400 Karayolu Üzeri  
293 Ada - 117 Parsel Bahçe İlçesi / OSMANIYE

Kaynak Adresi: Aşağı Arıcaklı Köyü Ayrancıkharman Mah.  
Ayrancık mevkii 376 Ada - 3 Parsel Bahçe İlçesi / OSMANIYE

Sahibi: Ayrancık Su Sanayi ve Ticaret A.Ş.

Toplam Debisi: 3.8 L/sn

İşleticisi: Ayrancık Su Sanayi ve Ticaret A.Ş.

İmza Şekli : 19 L. Polikarbonat Damacana,  
0.2-0.33-0.4-0.5-1-1.2-1.5-5-10-17-19 L. Pet Şişe,  
200-250-300 ml.Pet Bardak.

**NİTELİKLERİ**

**A. MİKROBİYOLOJİK PARAMETRELER**

| Parametre                                     | Birim      | Değeri |
|-----------------------------------------------|------------|--------|
| E. coli                                       | 250 ml' de | 0      |
| Enterokok                                     | 250 ml' de | 0      |
| Koliform bakteri                              | 250 ml' de | 0      |
| P. aeruginosa                                 | 250 ml' de | 0      |
| Anaerob sporlu sülfid redükte eden bakteriler | 50 ml' de  | 0      |
| Patojen stafilokoklar                         | 100 ml' de | 0      |
| Koloni sayısı (22 °C)                         | ml' de     | 0      |
| Koloni sayısı (37 °C)                         | ml' de     | 0      |
| Parazitler                                    | 100 ml' de | 0      |

**B. KİMYASAL PARAMETRELER (devam)**

|                                          |      |   |
|------------------------------------------|------|---|
| Pestisitler                              | µg/L | 0 |
| Toplam pestisitler                       | µg/L | 0 |
| PAH (Polisiklik aromatik hidrokarbonlar) | µg/L | 0 |
| Selenyum                                 | µg/L | 0 |
| Tetrakloreten ve trikloreten             | µg/L | 0 |
| Toplam Trihalometanlar                   | µg/L | 0 |
| Vinil Klorür                             | µg/L | 0 |

**B. KİMYASAL PARAMETRELER**

|                |      |      |
|----------------|------|------|
| Akrilamid      | µg/L | 0    |
| Antimon        | µg/L | 0    |
| Arsenik        | µg/L | 0    |
| Benzen         | µg/L | 0    |
| Benzo(a)piren  | µg/L | 0    |
| Bor            | mg/L | 0    |
| Bromat         | µg/L | 0    |
| Kadmiyum       | µg/L | 0    |
| Krom           | µg/L | 0    |
| Bakır          | mg/L | 0    |
| Siyanür        | µg/L | 0    |
| 1,2-dikloreten | µg/L | 0    |
| Epikloridin    | µg/L | 0    |
| Florür         | mg/L | 0    |
| Kurşun         | µg/L | 0    |
| Civa           | µg/L | 0    |
| Nikel          | µg/L | 0    |
| Nitrat         | mg/L | 5.59 |
| Nitrit         | mg/L | 0    |

**C. GÖSTERGE PARAMETRELERİ**

|                             |                     |       |
|-----------------------------|---------------------|-------|
| Koloni sayısı (22 °C)       | ml' de              | 0     |
| Koliform bakteri            | 100 ml' de          | 0     |
| Renk                        |                     | Uygun |
| Koku                        |                     | Uygun |
| Tat                         |                     | Uygun |
| Bulanıklık                  |                     | Uygun |
| pH                          | pH birimleri        | 7.44  |
| İletkenlik                  | 20 °C'de µS/cm      | 110   |
| Alüminyum                   | µg/L                | 0     |
| Amonyum                     | mg/L                | 0     |
| Klorür                      | mg/L                | 3.12  |
| Demir                       | µg/L                | 0     |
| Mangan                      | µg/L                | 0     |
| Oksitlenebilirlik           | mg/L O <sub>2</sub> | 0     |
| Sülfat                      | mg/L                | 8.37  |
| Sodyum                      | mg/L                | 3.86  |
| TOC (Toplam Organik Karbon) | µg/L                | 0     |

**D. RADYOAKTİVİTE**

|                      |         |       |
|----------------------|---------|-------|
| Trityum              | Bq/L    | Uygun |
| Toplam gösterge dozu | mSv/yıl | Uygun |

Muammer BALCI  
Vali a.  
Vali Yardımcısı



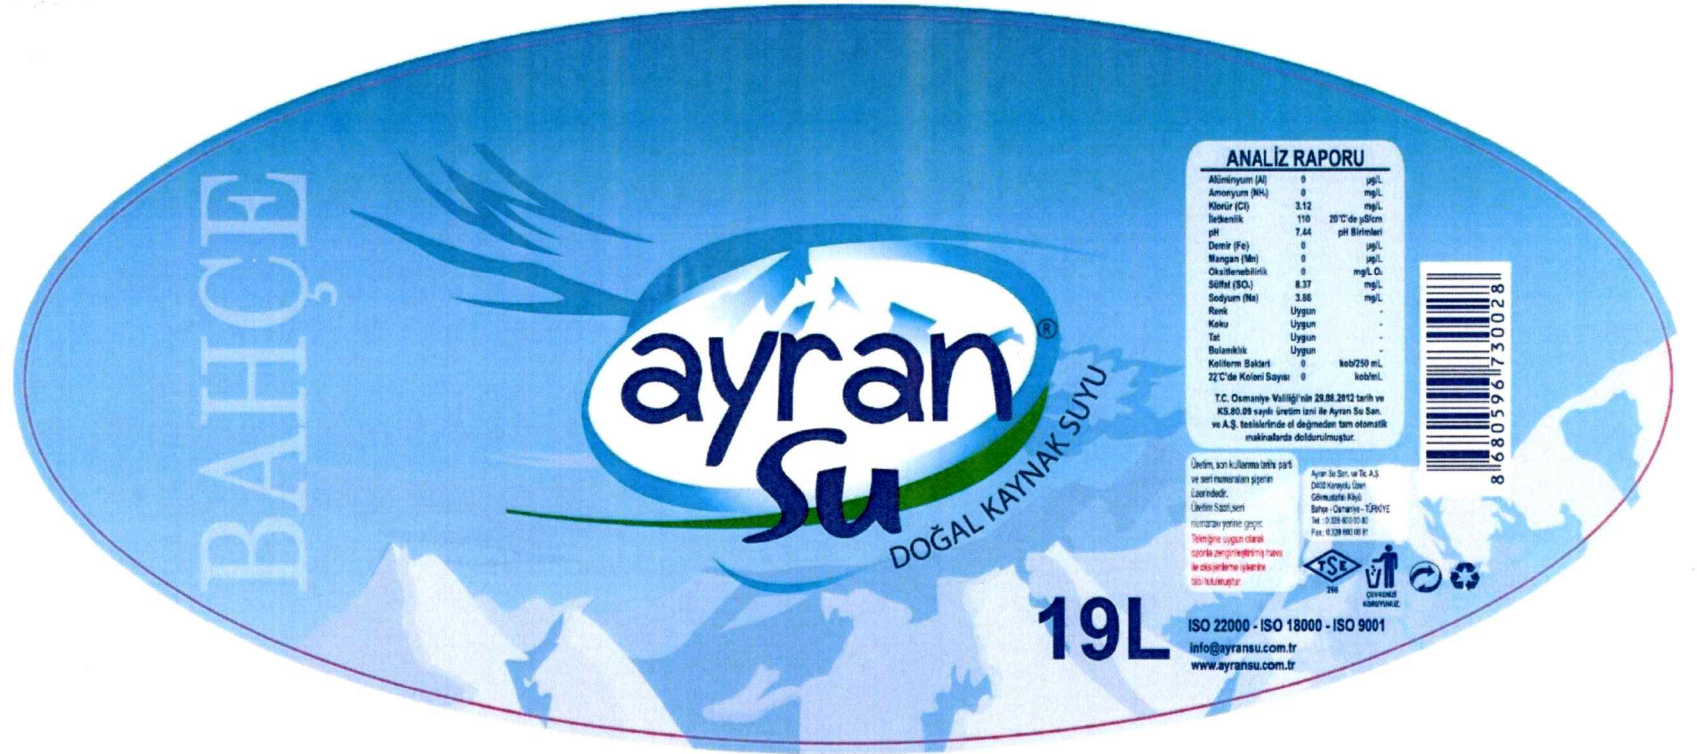

#### ANALİZ RAPORU

|                            |       |               |
|----------------------------|-------|---------------|
| Alüminyum (Al)             | 0     | µg/L          |
| Amonyum (NH <sub>4</sub> ) | 0     | mg/L          |
| Klorür (Cl)                | 3.12  | mg/L          |
| İtkenlik                   | 110   | 20°C'de µS/cm |
| pH                         | 7.44  | pH Birimleri  |
| Demir (Fe)                 | 0     | µg/L          |
| Mangan (Mn)                | 0     | µg/L          |
| Çinko (Zn)                 | 0     | mg/L          |
| Sülfür (SO <sub>4</sub> )  | 8.37  | mg/L          |
| Sodyum (Na)                | 3.88  | mg/L          |
| Renk                       | Uygun | -             |
| Koku                       | Uygun | -             |
| Tat                        | Uygun | -             |
| Bulaşıklık                 | Uygun | -             |
| Koliform Bakteri           | 0     | kob/250 mL    |
| 22°C'de Koloni Sayısı      | 0     | kob/10L       |

T.C. Osmaniye Valiliği'nin 28.08.2012 tarih ve KŞ.80.08 sayılı üretim izni ile Ayran Su San. ve A.Ş. tesislerinde el değmeden tam otomatik makinelerde doldurulmuştur.

Üretim, son kullanıma tarihine kadar ve seri numaraları görünür durumda.  
Üretim Saati seri numarası görünürdür.  
Talebinizi karşılama konusunda yardımcı olmaya hazırız.  
İletişim için lütfen bizimle iletişime geçiniz.

Ayran Su San. ve Tic. A.Ş.  
D400 Karayolu Üzeri  
Osmaniye İlçesi  
Bulvarı - Osmaniye - T39/12  
Tel: 0 328 600 00 00  
Fax: 0 328 600 00 01

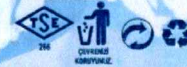

ISO 22000 - ISO 18000 - ISO 9001  
info@ayransu.com.tr  
www.ayransu.com.tr

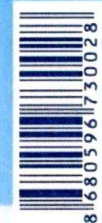

T.C.  
SAĞLIK BAKANLIĞI  
OSMANİYE İL SAĞLIK MÜDÜRLÜĞÜ 28.07.2022

Süleyman DOĞAN  
Uzman  
Çevre Sağlık Birimi

Uzm.Dr. Erain PEKER  
Halk Sağlığı Hizmetleri  
Başkan Yardımcısı

Dr. Mehmet BAHAR  
Halk Sağlığı Hizmetleri  
Başkanı

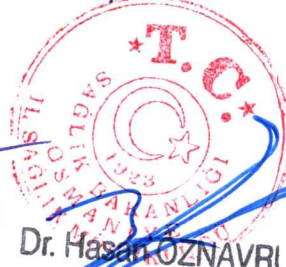

Dr. Hasan ÖZNAVRUZ  
İl Sağlık Müdürü

AYRAN SU SANAYİ VE TİC. A.Ş.  
Osmaniye v.D. Y.No: 127/1-1345  
Osmaniye İlçesi S.Ç. No: B.950  
D.400 Karayolu Üzeri İsmetpaşalı Köyü  
Tel: 0 328 600 00 00  
600 0061  
BAHÇE OSMANİYE





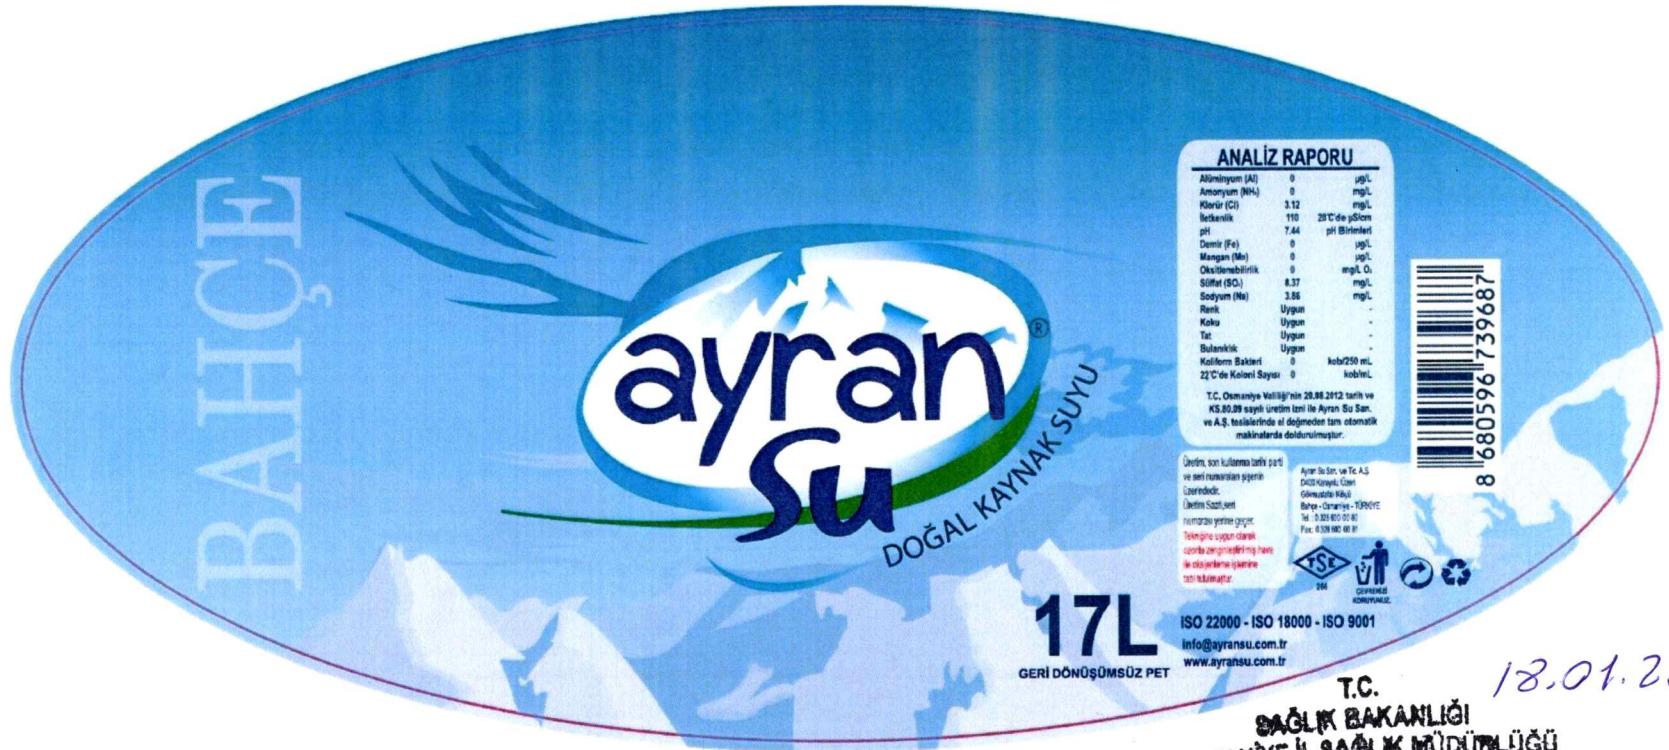

#### ANALİZ RAPORU

|                            |       |                     |
|----------------------------|-------|---------------------|
| Alüminyum (Al)             | 0     | µg/L                |
| Amonyum (NH <sub>4</sub> ) | 0     | mg/L                |
| Klorür (Cl)                | 3.12  | mg/L                |
| İletkenlik                 | 110   | 25°C'de ölçüm       |
| pH                         | 7.44  | pH Birimleri        |
| Demir (Fe)                 | 0     | µg/L                |
| Mangan (Mn)                | 0     | µg/L                |
| Oksitlenebilirlik          | 0     | mg/L O <sub>2</sub> |
| Sülfat (SO <sub>4</sub> )  | 8.37  | mg/L                |
| Sodyum (Na)                | 1.86  | mg/L                |
| Renk                       | Uygun | -                   |
| Koku                       | Uygun | -                   |
| Tat                        | Uygun | -                   |
| Bulanıklık                 | Uygun | -                   |
| Kaliforniya Bakteri        | 0     | kob/250 mL          |
| 22°C'de Koloni Sayısı      | 0     | kob/1mL             |

T.C. Osmaniye Valiliği'nin 28.04.2012 tarih ve K.5.80.39 sayılı kararı ile Ayran Su San. ve A.Ş. tesislerinde el değmediren tesis atarlık makinalarında doldurulmuştur.

Üretim, son kullanma tarihi ya da ve seri numarası geçiren  
Çarşafçılık  
Üretim Saati, seri  
Numarası yerinde geçer.

Teknikçe uygun olarak  
uzun süreli üretim tesis  
tekniklerinde üretilen  
su kullanılmaktadır.

Ayran Su San. ve Tic. A.Ş.  
Düziçi Köyü, Çarşafçılık  
Osmaniye (Mül.)  
Barın - Çarşafçılık - 46100  
Tel: 0 326 453 01 81  
Fax: 0 326 453 01 81

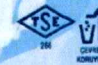

ISO 22000 - ISO 18000 - ISO 9001  
info@ayransu.com.tr  
www.ayransu.com.tr

17L  
GERİ DÖNÜŞÜMSÜZ PET

T.C. SAĞLIK BAKANLIĞI  
OSMANIYE İL SAĞLIK MÜDÜRLÜĞÜ  
18.01.2022

Süleyman DOĞAN  
Uzman  
Çevre Sağlığı Birimi

*[Signature]*

Uzm. Dr. Ersin PEKER  
Halk Sağlığı Hizmetleri  
Başkan Yardımcısı

Dr. Mehmet BAĞAR  
Halk Sağlığı Hizmetleri  
Başkanı

Dr. Hasan ÖZNAVRUZ  
İl Sağlık Müdürü

AYRAN SU SANAYİ VE TİC. A.Ş.  
Osmaniye Valiliği'ne 2011043015  
Osmaniye Valiliği Sayı: 2011043015  
D-400 Karayolu Üzerinde Mustafa Köyü  
Tel: 0 326 453 01 81 Faks: 0 326 453 00 81  
BAHÇE OSMANIYE

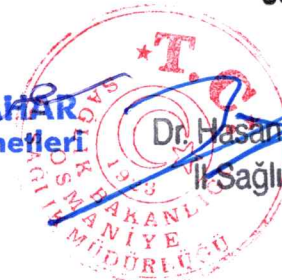

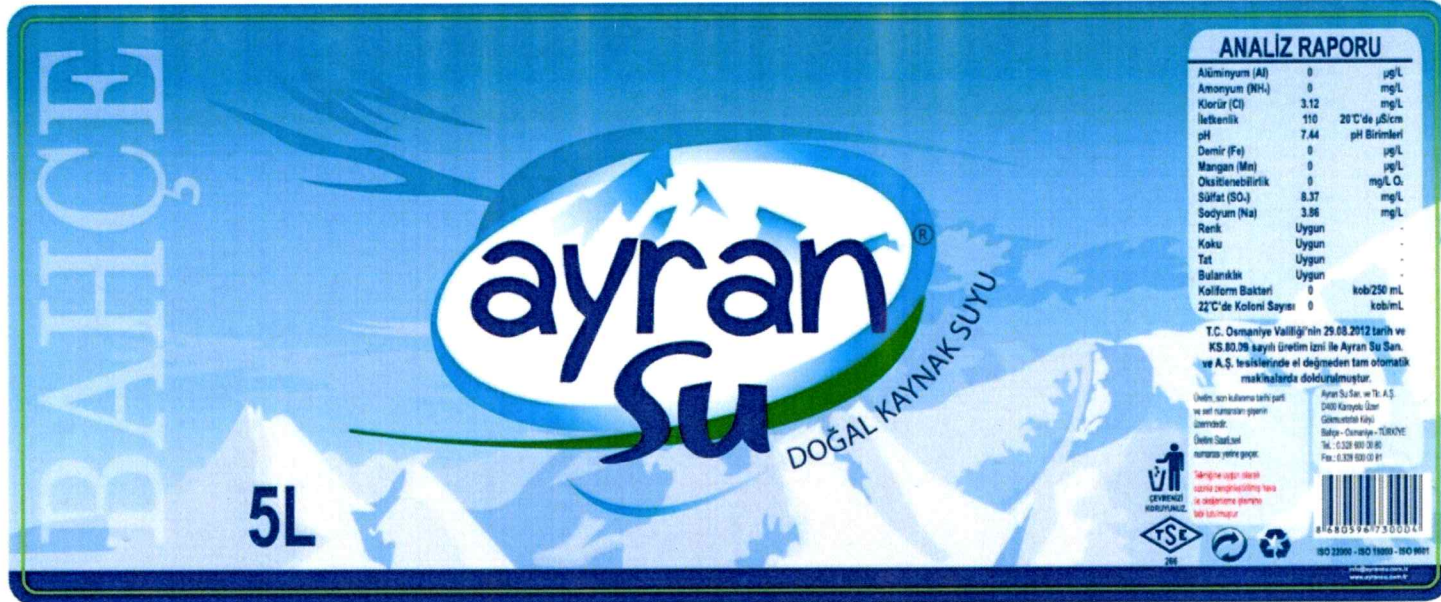

### ANALİZ RAPORU

|                            |       |                     |
|----------------------------|-------|---------------------|
| Alüminyum (Al)             | 0     | µg/L                |
| Amonyum (NH <sub>4</sub> ) | 0     | mg/L                |
| Klorür (Cl)                | 3.12  | mg/L                |
| İletkenlik                 | 110   | 20°C'de µS/cm       |
| pH                         | 7.44  | pH Birimleri        |
| Demir (Fe)                 | 0     | µg/L                |
| Mangan (Mn)                | 0     | µg/L                |
| Oksitlenebilirlik          | 0     | mg/L O <sub>2</sub> |
| Sülfat (SO <sub>4</sub> )  | 8.37  | mg/L                |
| Sodyum (Na)                | 3.86  | mg/L                |
| Renk                       | Uygun |                     |
| Koku                       | Uygun |                     |
| Tat                        | Uygun |                     |
| Bulanıklık                 | Uygun |                     |
| Koliform Bakteri           | 0     | kob/250 mL          |
| 22°C'de Koloni Sayısı      | 0     | kob/mL              |

T.C. Osmaniye Valiliği'nin 29.08.2012 tarih ve KS.80.06 sayılı üretim izni ile Ayransu Su San. ve A.Ş. tesislerinde el değirmeden tam otomatik makinelerde doldurulmuştur.

Üretim, son kullanma tarihi şartı ve seri numaraları uygulanmaktadır.

Üretim Standartları uluslararası standartlara uygundur.

Herhangi bir sağlık sorunu yaşarsanız lütfen doktorunuza danışınız.

Ayransu Su San. ve Tic. A.Ş.  
0400 Karapınar Üzeri  
Osmaniye Köyü  
Osmaniye - Osmaniye - TÜRKİYE  
Tel: 0326 800 50 00  
Fax: 0326 800 00 01

8 440596 730004

ISO 22000 - ISO 18001 - ISO 9001

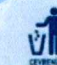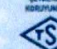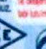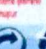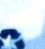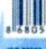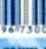

T.C. 18.07.2022

SAĞLIK BAKANLIĞI  
OSMANİYE İL SAĞLIK MÜDÜRLÜĞÜ

Süleyman DOĞAN  
Uzman  
Çevre Sağlığı Birimi

Uzm.Dr. Ersin PEKER  
Halk Sağlığı Hizmetleri  
Başkan Yardımcısı

Dr. Mehmet BAĞAR  
Halk Sağlığı Hizmetleri  
Başkanı

Dr. Hasan ÖZNAVRUZ  
İl Sağlık Müdürü

AYRANSU SANAYİ VE TİC. A.Ş.  
Osmaniye Valiliği  
Osmaniye İlçe Ofisi Bldi No: 8.950  
D-400 Karapınar Üzeri Çankaya Köyü  
Tel: 0326 800 50 00  
Fax: 0326 800 00 01  
BİRLİKTE OSMANİYE



BAHÇE

ayran  
su

DOĞAL KAYNAK SUYU  
1,5 L

**ANALİZ RAPORU**

|                            |      |               |                           |       |                     |
|----------------------------|------|---------------|---------------------------|-------|---------------------|
| Alüminyum (Al)             | 0    | µg/L          | Oksijenbirlirik           | 0     | mg/L O <sub>2</sub> |
| Amonyum (NH <sub>4</sub> ) | 0    | mg/L          | Sulfat (SO <sub>4</sub> ) | 8.37  | mg/L                |
| Klorür (Cl)                | 3.12 | mg/L          | Sodyum (Na)               | 3.86  | mg/L                |
| İrsenik                    | 110  | 20°C'de µS/cm | Renk                      | Uygun | -                   |
| pH                         | 7.44 | pH Birimi     | Koku                      | Uygun | -                   |
| Demir (Fe)                 | 0    | µg/L          | Tat                       | Uygun | -                   |
| Mangan (Mn)                | 0    | µg/L          | Durulanıklık              | Uygun | -                   |

T.C. Osmaniye Valiliği'nin 29.08.2012 tarih ve KS.80.09 sayılı üretim izni ile Ayran Su San. ve Tic. A.Ş. tesislerinde el değmeden tam otomatik makinelerde doldurulmuştur.  
Temiz, kuru, serin ve kokusuz bir ortamda, güneş ışığından koruyarak saklarız.  
Üretim, son kullanma tarihi pastri ve seri numaraları şişanın üzerindedir. Üretim saati seri numarasına yerine geçer.  
**Kaynar suyun elinizle sıcak suya eklenmesi veya bu sıcak suya eklenmesi tavsiye edilmez.**  
ISO 9001 ISO 22000 ISO 18000  
Ayran Su San. ve Tic. A.Ş.  
D.400 Karayolu Üzümü Gökmertek Köyü Bahçe / Osmaniye / Türkiye  
Tel: 0 328 400 00 00 Fax: 0 328 400 00 81  
www.ayransu.com.tr

ayran  
su

DOĞAL KAYNAK SUYU  
1,5 L

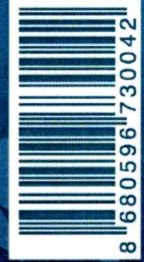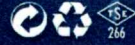

T.C.  
SAĞLIK BAKANLIĞI  
OSMANİYE İL SAĞLIK MÜDÜRLÜĞÜ

18.02.2022

Süleyman DOĞAN  
Uzman  
Çevre Sağlığı Birimi

Uzm.Dr. Ersin PEKER  
Halk Sağlığı Hizmetleri  
Başkan Yardımcısı

Dr. Mehmet BAĞAR  
Halk Sağlığı Hizmetleri  
Başkanı

Dr. Hasan ÖZNAVRUZ  
İl Sağlık Müdürü

AYRAN SU SANAYİ VE TİC. A.Ş.  
Osmaniye V.D. V.No: 1230704345  
Osmaniye Tic. Sic. No: 8.990  
D-400 Karayolu Üzümü Gökmertek Köyü Bahçe / Osmaniye / Türkiye  
Tel: 0 328 600 00 00 Fax: 0 328 600 00 81  
BAHÇE OSMANİYE

BAHÇE

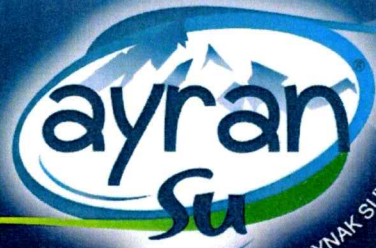

DOĞAL KAYNAK SUYU

1,2 L

| ANALİZ RAPORU              |      |             |                           |       |                     |
|----------------------------|------|-------------|---------------------------|-------|---------------------|
| Alüminyum (Al)             | 0    | ppb         | Oksitlenabilirlik         | 0     | mg/L O <sub>2</sub> |
| Amonyum (NH <sub>4</sub> ) | 0    | mg/L        | Sülfat (SO <sub>4</sub> ) | 8.57  | mg/L                |
| Klorür (Cl)                | 3.12 | mg/L        | Sodyum (Na)               | 3.86  | mg/L                |
| Demir (Fe)                 | 110  | 20'ye µS/cm | Fluor                     | Uygun | -                   |
| pH                         | 7.44 | pH Birim    | Kalsiyum (Ca)             | Uygun | -                   |
| Demir (Fe)                 | 0    | ppb         | Tit                       | Uygun | -                   |
| Manganez (Mn)              | 0    | ppb         | Bütanediol                | Uygun | -                   |

T.C. Osmaniye Valiliği'nin 29.08.2012 tarih ve KS.80.09 sayılı üretim izni ile Ayran Su San. ve Tic. A.Ş. tesislerinde el değirmenli tüm otomatik makinelerde doldurulmuştur.  
Temiz, kuru, serin ve kokusuz bir ortamda, güneş ışığından koruyarak saklayınız.  
Üretim, son kullanma tarihi pastri ve seri numaraları şişenin üzerindedir.  
Üretim tarihi seri numarası yerine geçer.  
Tüketim için uygun olan ambalajın kullanılması tavsiye edilir.  
ISO 9001 ISO 22000 ISO 18000  
Ayran Su San. ve Tic. A.Ş.  
D.400 Karayolu Üzümü Çukuru'daki Köyü / Bahçe / Osmaniye / Türkiye  
Tel: 0 328 600 0060 Fax: 0 328 600 0061  
www.ayransu.com.tr

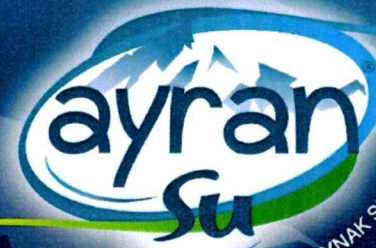

DOĞAL KAYNAK SUYU

1,2 L

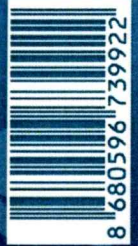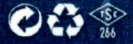

786

ttt

Süleyman DOĞAN  
Uzman  
Çevre Sağlığı Birimi

Uzm.Dr. Ersin PEKER  
Halk Sağlığı Hizmetleri  
Başkan Yardımcısı

Dr. Mehmet BAHAR  
Halk Sağlığı Hizmetleri  
Başkanı

T.C.  
SAĞLIK BAKANLIĞI  
OSMANİYE İL SAĞLIK MÜDÜRLÜĞÜ

Dr. Hasan ÖZNAVRUZ  
İl Sağlık Müdürü

18.07.2022

AYRAN SU SANAYİ VE TİC. A.Ş.  
Osmaniye V.D. V.No: 122114345  
Osmaniye T.C. D.400 Karayolu Üzümü Çukuru / Bahçe / Osmaniye / Türkiye  
D-400 Karayolu Üzümü Çukuru / Bahçe / Osmaniye / Türkiye  
Tel: 0 328 600 0060 Fax: 0 328 600 0061  
BAHÇE OSMANİYE



BAHÇE

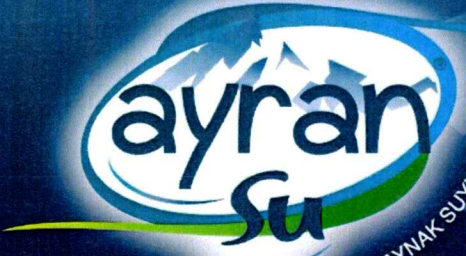

DOĞAL KAYNAK SUYU

1 L

ANALİZ RAPORU

|                            |      |               |                           |       |      |    |
|----------------------------|------|---------------|---------------------------|-------|------|----|
| Alüminyum (Al)             | 0    | µg/L          | Çiğirtenbilirlik          | 0     | mg/L | Oz |
| Amonyum (NH <sub>4</sub> ) | 0    | mg/L          | Sülfat (SO <sub>4</sub> ) | 8.37  | mg/L |    |
| Klorür (Cl)                | 3.12 | mg/L          | Sodyum (Na)               | 3.66  | mg/L |    |
| Belirsizlik                | 110  | 20°C'de µS/cm | Renk                      | Uygun |      |    |
| pH                         | 7.44 | pH Birimi     | Koku                      | Uygun |      |    |
| Demir (Fe)                 | 0    | µg/L          | Tat                       | Uygun |      |    |
| Mangan (Mn)                | 0    | µg/L          | Büneliklik                | Uygun |      |    |

T.C. Osmaniye Yöneliği'nin 29.08.2012 tarih ve KS.80.09 sayılı üretilim izni ile Ayran Su San. ve Tic. A.Ş. tesislerinde el değmeden tam otomatik makinelerde doldurulmuştur.

Temiz, kuru, serin ve kokusuz bir ortamda, güneş ışığından koruyarak saklarıyoruz.

Üretim, son kullanma tarihi tarihi ve seri numaraları şişenin üzerindedir. Üretim tarihi seri numarası yerine geçer.

Herhangi bir sorun durumunda sorumlulukları her iki okuyunuz. Üretiminizi bizden bekleyiniz.

ISO 9001 ISO 22000 ISO 18000  
Ayran Su San. ve Tic. A.Ş.

0.400 Karayolu Üzeri Göksu/İstanbul Köyü / Osmaniye / Türkiye  
Tel: 0.328. 400 00 80 Fax: 0.328. 400 00 81  
www.ayransu.com.tr

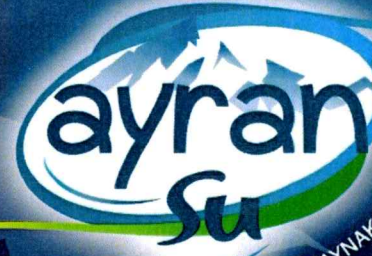

DOĞAL KAYNAK SUYU

1 L

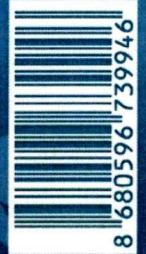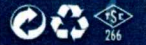

T.C.  
SAĞLIK BAKANLIĞI  
OSMANIYE İL SAĞLIK MÜDÜRLÜĞÜ 18.07.2022

Dr. Mehmet BAHAR  
Halk Sağlığı Hizmetleri  
Başkanı

Dr. Hasan ÖZNAVRUZ  
İl Sağlık Müdürü

Süleyman DOĞAN  
Uzman  
Çevre Sağlığı Birimi

Uzm.Dr. Ersin BEKER  
Halk Sağlığı Hizmetleri  
Başkan Yardımcısı

AYRAN SU SANAYİ VE TİC. A.Ş.  
Osmaniye V.D. V.No: 12/11/04345  
Osmaniye Tic. Sic. Sic.No: B.990  
D:400 Karayolu Üzeri Göksu/İstanbul Köyü  
Tel: 0 328 400 00 80 Faks: 0 328 400 00 81  
BAHÇE OSMANIYE

BAHÇE

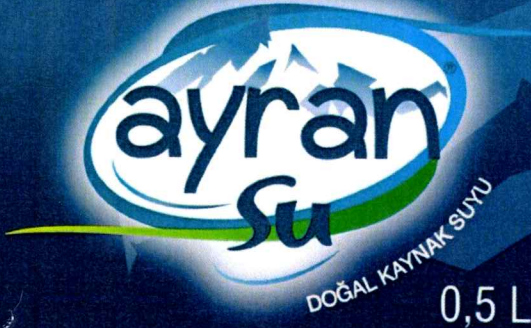

**ANALİZ RAPORU**

|                            |      |               |                           |       |      |    |
|----------------------------|------|---------------|---------------------------|-------|------|----|
| Alüminyum (Al)             | 0    | µg/L          | Oksijenlilik              | 0     | mg/L | Öz |
| Amonyum (NH <sub>4</sub> ) | 0    | mg/L          | Sülfat (SO <sub>4</sub> ) | 0,37  | mg/L |    |
| Klorür (Cl)                | 3,12 | mg/L          | Sodyum (Na)               | 3,86  | mg/L |    |
| İletkenlik                 | 110  | 20°C'de µS/cm | Renk                      | Uygun |      |    |
| pH                         | 7,44 | pH Birimi     | Koku                      | Uygun |      |    |
| Demir (Fe)                 | 0    | µg/L          | Tat                       | Uygun |      |    |
| Mangan (Mn)                | 0    | µg/L          | Bulaşıklık                | Uygun |      |    |

T.C. Osmaniye Valiliği'nin 29.08.2012 tarih ve KS.80.09 sayılı İzin izni ile Ayran Su San. ve Tic. A.Ş. Tesislerinde el değirmenli taş otomatik makinelerde dokümanımızdır.  
Temiz, kuru, serin ve kokusuz bir ortamda, güneş ışığından koruyarak saklarıyoruz.  
İçecek, sen kalırsan tadı parlı ve seni numaraları için içinde.  
İçecek seri numarası yerine geçer.  
İçeceklerin uygun olarak kullanılmasını hava ile oksijenele  
dikkatli olarak saklayınız.  
ISO 9001 ISO 22000 ISO 18000  
Ayran Su San. ve Tic. A.Ş.  
D-400 Karayolu Üzeri Gökmenler Köyü / Bahçe / Osmaniye / Türkiye  
Tel: 0 328 600 00 00 Fax: 0 328 600 00 01  
www.ayransu.com.tr

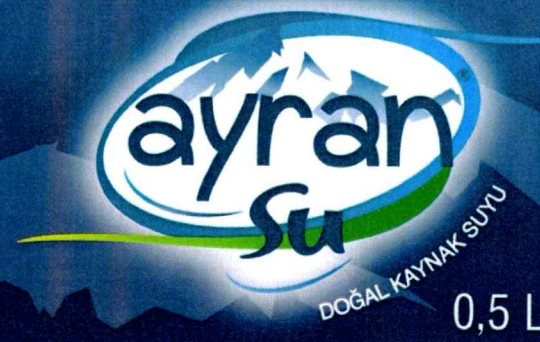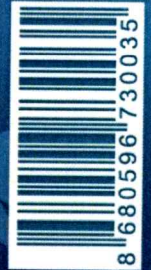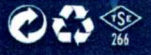

AYRAN SU SANAYİ VE TİC. A.Ş.

T.C.  
SAĞLIK BAKANLIĞI  
OSMANİYE İL SAĞLIK MÜDÜRLÜĞÜ

18.07.2022

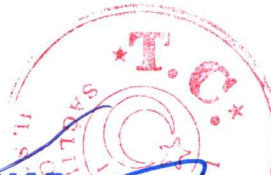

Süleyman DOĞAN  
Uzman  
Çevre Sağlığı Birimi

Uzm.Dr. Ersin PEKER  
Halk Sağlığı Hizmetleri  
Başkan Yardımcısı

Dr. Mehmet BAHAR  
Halk Sağlığı Hizmetleri  
Başkanı

Dr. Hasan ÖZNAVRUZ  
İl Sağlık Müdürü

AYRAN SU SANAYİ VE TİC. A.Ş.  
Osmaniye V.D. M.Nr. 1270/94745  
Osmaniye T.C. Dışişleri Bakanlığı B.990  
D-400 Karayolu Üzeri Gökmenler Köyü  
Tel: 0 328 600 00 00 Fax: 0 328 600 00 01  
BAHÇE - OSMANİYE



BAHÇE

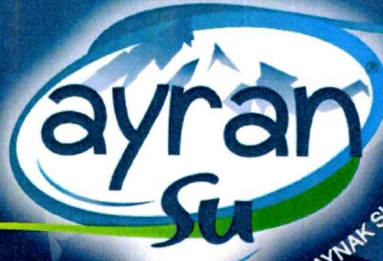

DOĞAL KAYNAK SUYU

0,4 L

ANALİZ RAPORU

|                            |      |               |                           |       |                     |
|----------------------------|------|---------------|---------------------------|-------|---------------------|
| Alüminyum (Al)             | 0    | µg/L          | Oksijenlenmiş             | 0     | mg/L O <sub>2</sub> |
| Amonyum (NH <sub>4</sub> ) | 0    | mg/L          | Sülfat (SO <sub>4</sub> ) | 8,37  | mg/L                |
| Klorür (Cl)                | 3,12 | mg/L          | Sodyum (Na)               | 3,86  | mg/L                |
| İskenderik                 | 110  | 20 C'de µS/cm | Renk                      | Uygun | -                   |
| pH                         | 7,44 | pH Birimi     | Koku                      | Uygun | -                   |
| Demir (Fe)                 | 0    | µg/L          | Tat                       | Uygun | -                   |
| Mançan (Mn)                | 0    | µg/L          | Buzlanıklık               | Uygun | -                   |

T.C. Osmaniye Valiliği'nin 29.08.2012 tarih ve KS.80.09 sayılı  
üretim izni ile Ayran Su San. ve Tic. A.Ş. tesislerinde ol doğmadan  
tam otomatik makinelerde doldurulmuştur.

**Temiz, kuru, serin ve kokusuz bir ortamda, güneş  
ışığından koruyarak saklıyoruz.**

Üretim, son kullanıma hazır parti ve seri numaraları sistemin üzerindedir.  
Üretim saati seri numarasına yerine geçer.

**İçişleri Bakanlığı'nın 29.08.2012 tarih ve KS.80.09 sayılı  
üretim izni ile Ayran Su San. ve Tic. A.Ş. tesislerinde ol doğmadan  
tam otomatik makinelerde doldurulmuştur.**

ISO 9001 ISO 22000 ISO 18000

Ayran Su San. ve Tic. A.Ş.  
0.400 Karayolu Üzeri Gökmustafalı Köyü Bahçe / Osmaniye / Türkiye  
Tel: 0.328. 600 00 80 Fax: 0.328. 600 00 81  
www.ayransu.com.tr

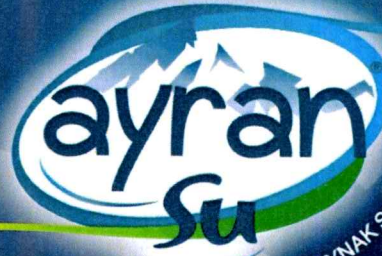

DOĞAL KAYNAK SUYU

0,4 L

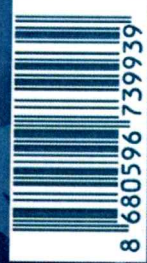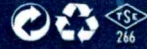

AYRAN SU SANAYİ VE TİC. A.Ş.

T.C.  
SAĞLIK BAKANLIĞI  
OSMANİYE İL SAĞLIK MÜDÜRLÜĞÜ

17.07.2022

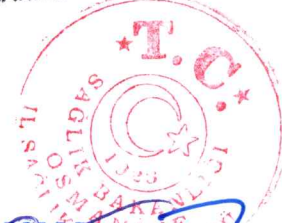

Süleyman DOĞAN  
Uzman  
Çevre Sağlığı Birimi

Uzm.Dr. Ersin PEKER  
Halk Sağlığı Hizmetleri  
Başkan Yardımcısı

Dr. Mehmet BAHAR  
Halk Sağlığı Hizmetleri  
Başkanı

Dr. Hasan ÖZNAVRUZ  
İl Sağlık Müdürü

AYRAN SU SANAYİ VE TİC. A.Ş.  
Osmaniye V.D. V.No: 1230104345  
Osmaniye Tic. Odası Sıra No: B-990  
D-400 Karayolu Üzeri Gökmustafalı Köyü  
Tel: 0 328 600 00 80 Fax: 0 328 600 00 81  
BAHÇE / OSMANİYE

BAHÇE

ayran  
su

DOĞAL KAYNAK SUYU

0,33 L

ANALİZ RAPORU

|                            |      |                   |                           |       |         |
|----------------------------|------|-------------------|---------------------------|-------|---------|
| Alüminyum (Al)             | 0    | µg/L              | Oksitlenebilirlik         | 0     | mg/L Oz |
| Amonyum (NH <sub>4</sub> ) | 0    | mg/L              | Sülfat (SO <sub>4</sub> ) | 8,37  | mg/L    |
| Klorür (Cl)                | 3,12 | mg/L              | Sodyum (Na)               | 3,86  | mg/L    |
| İzdemirlik                 | 110  | 20°C'de 15cm Renk | Uygun                     | -     | -       |
| pH                         | 7,44 | pH Birimi         | Koku                      | Uygun | -       |
| Demir (Fe)                 | 0    | µg/L              | Tat                       | Uygun | -       |
| Mangan (Mn)                | 0    | µg/L              | Bulanıklık                | Uygun | -       |

T.C. Osmaniye Valiliği'nin 29.08.2012 tarih ve KŞ.80.09 sayılı  
üretimi izni ile Ayran Su San. ve Tic. A.Ş. tesislerinde el değmeden  
tam otomatik makinelerde doldurulmuştur.  
Temiz, kuru, serin ve kokusuz bir ortamda, güneş  
ışığından koruyarak saklarıyoruz.

Üretim, su kullanma harabı parli ve seri numaranın işaretindedir.  
Üretin saati seri numarası yerine geçer.

**Kısa süre ayran elerli esnek mapeledeki lava ile okuyun  
işleme talimatını.**

ISO 9001 ISO 22000 ISO 18000

Ayran Su San. ve Tic. A.Ş.  
D.400 Karaveli Üzeri Çökmeztafak Köyü Bahçe / Osmaniye / Türkiye  
Tel: 0.328. 600 00 80 Faks: 0.328. 600 00 81  
www.ayransu.com.tr

ayran  
su

DOĞAL KAYNAK SUYU

0,33 L

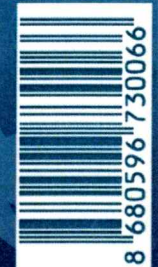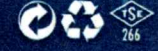

YILMAZ İRİMLER

T.C.  
SAĞLIK BAKANLIĞI  
OSMANİYE İL SAĞLIK MÜDÜRLÜĞÜ  
18.07.2022

Dr. Mehmet BAKAR  
Halk Sağlığı Hizmetleri  
Başkanı

Dr. Hasan ÖZNAVRUZ  
İl Sağlık Müdürü

Süleyman DOĞAN  
Uzman  
Çevre Sağlığı Birimi

Uzm.Dr. Ersin BEKER  
Halk Sağlığı Hizmetleri  
Başkan Yardımcısı

AYRAN SU SANAYİ VE TİC. A.Ş.  
Osmaniye V.D./V.No: 1230/0345  
Osmaniye Tic. Sicil No: 6.990  
D-400 Karaveli Üzeri Çökmeztafak Köyü  
Tel: 0.328. 600 00 80 Faks: 600 00 81  
BAHÇE / OSMANİYE

ltt



BAHÇE

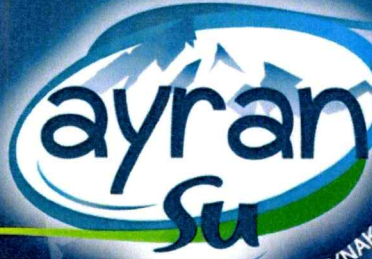

DOĞAL KAYNAK SUYU  
0,2 L

ANALİZ RAPORU

|                            |      |               |                           |       |                     |
|----------------------------|------|---------------|---------------------------|-------|---------------------|
| Alüminyum (Al)             | 0    | µg/L          | Oksitlenebilirlik         | 0     | mg/L O <sub>2</sub> |
| Amonyum (NH <sub>4</sub> ) | 0    | mg/L          | Sülfat (SO <sub>4</sub> ) | 6,37  | mg/L                |
| Klorür (Cl)                | 3,12 | mg/L          | Sodyum (Na)               | 3,86  | mg/L                |
| Telesnik                   | 110  | 20°C'de µS/cm | Renk                      | Uygun |                     |
| pH                         | 7,44 | pH            | Bitirleri                 | Koku  | Uygun               |
| Demir (Fe)                 | 0    | µg/L          | Tat                       | Uygun |                     |
| Mangany (Mn)               | 0    | µg/L          | Bulaşıklık                | Uygun |                     |

T.C. Osmaniye Valiliği'nin 29.08.2012 tarih ve KS.80.09 sayılı  
Gözetim izni ile Ayran Su San. ve Tic. A.Ş. Tesislerinde el değmeden  
tam otomatik makinelerde doldurulmuştur.  
Temiz, kuru, serin ve kokusuz bir ortamda, güneş  
ışığından koruyarak saklarıyoruz.

Üretim, suu kullonma tarihı parti ve seri numaraları şişme üzerindedir.  
Üretim tarihi seri numaraları yerne göre:

**İzlenim için dikkatle okuyunuz!** İncelemeden önce ila dışarıdan  
çıkması tehlikesi vardır.

ISO 9001 ISO 22000 ISO 18000  
Ayran Su San. ve Tic. A.Ş.  
D.400 Karayolu Üzere Çökemustafalı Köyü / Bahçe / Osmaniye / Türkiye  
Tel: 0.328. 600 00 80 Fax: 0.328. 600 00 81  
www.ayransu.com.tr

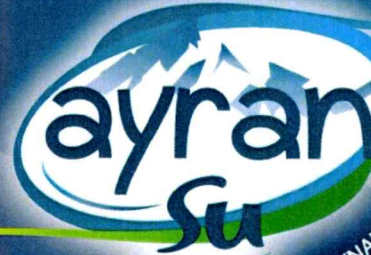

DOĞAL KAYNAK SUYU  
0,2 L

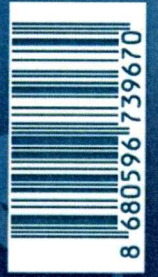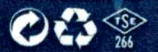

T.C.  
SAĞLIK BAKANLIĞI  
OSMANİYE İL SAĞLIK MÜDÜRLÜĞÜ

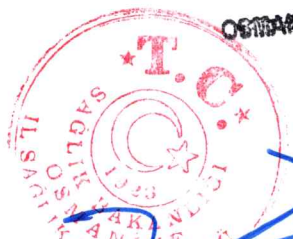

18.01.2022

Süleyman DOĞAN  
Uzman  
Çevre Sağlık Birimi

Uzm.Dr. Ersin PEKER  
Halk Sağlığı Hizmetleri  
Başkan Yardımcısı

Dr. Mehmet BAHAR  
Halk Sağlığı Hizmetleri  
Başkanı

Dr. Hasan ÖZNAVRUZ  
İl Sağlık Müdürü

AYRAN SU SANAYİ VE TİC. A.Ş.  
Osmaniye V.D. V.No: 1221/04345  
Osmaniye Tic. Sic. No: 8.950  
D.400 Karayolu Üzere Çökemustafalı Köyü  
Tel: 0.328.600.0080 Faks: 500.0081  
BAHÇE

**BAHCE**

**ayran Su**  
DOĞAL KAYNAK SUYU

**ANALİZ RAPORU**

|                            |      |               |                           |       |                     |
|----------------------------|------|---------------|---------------------------|-------|---------------------|
| Alüminyum (Al)             | 0    | µg/L          | Oksitlenebilirlik         | 0     | mg/L O <sub>2</sub> |
| Amonyum (NH <sub>4</sub> ) | 0    | mg/L          | Sülfat (SO <sub>4</sub> ) | 8.37  | mg/L                |
| Klorür (Cl)                | 3.12 | mg/L          | Sodyum (Na)               | 3.86  | mg/L                |
| iletkenlik                 | 110  | 20°C'de µS/cm | Renk                      | Uygun |                     |
| pH                         | 7.44 |               | Koku                      | Uygun |                     |
| Demir (Fe)                 | 0    | µg/L          | Tat                       | Uygun |                     |
| Mangan (Mn)                | 0    | µg/L          | Bulanıklık                | Uygun |                     |

T.C. Osmaniye Valiliği'nin 29.08.2012 tarih ve KS.80.09 Sayılı üretim izni ile Ayran Su San. ve Tic. A.Ş. Tesislerinde el değmeden tam otomatik makinelerde doldurulmuştur. Temiz, kuru, serin ve kokusuz bir ortamda güneş ışığından koruyarak saklarız.

ISO 9001 ISO 22000 ISO 18000 [www.ayransu.com.tr](http://www.ayransu.com.tr)

Ayran Su San. ve Tic. A.Ş.  
D-400 Karayolu Üzeri  
Sükkesevler Köyü  
Bahçe / Osmaniye / Türkiye  
Tel: 0328 080 00 00  
Fax: 0328 080 00 01

Üretim, son tüketim tarihi, parti ve seri numaraları, dolom hacmi bordajın altındadır. Üretim tarihi, parti numarası yerine, üretim saati seri numarası yerine geçer.

Teknikğine uygun olarak ozonla zenginleştirilmiş hava ile oksijenleme işlemine tabi tutulmuştur.

**DOĞAL KAYNAK SUYU**

**YILPAR AMBALAJ**  
ULSTER SARTI NO: YILPAR002

8 680596 739687

T.C.  
SAĞLIK BAKANLIĞI  
OSMANİYE İL SAĞLIK MÜDÜRLÜĞÜ

18.07.2022

**Süleyman DOĞAN**  
Uzman  
Çevre Sağlığı Birimi

**Uzm.Dr. Ersin PEKER**  
Halk Sağlığı Hizmetleri  
Başkan Yardımcısı

**Dr. Mehmet BAHAR**  
Halk Sağlığı Hizmetleri  
Başkanı

**Dr. Hasan ÖZNAVRUZ**  
İl Sağlık Müdürü

**AYRAN SU SANAYİ VE TİC. A.Ş.**  
Osmaniye V.D. V.No: 1220104345  
Osmaniye Tic. Odası Sırtı No: 1950  
D-400 Karayolu Üzeri Sükkesevler Köyü  
Tel: 0 328 080 00 00  
Fax: 0328 080 00 01  
BAHCE OSMANİYE
