# Supplementary material for: Spring water anomalies before two consecutive earthquakes (Mw 7.7 and Mw 7.6) in Kahramanmaraş (Türkiye) on 6 February 2023
Source: Copernicus journal article supplement (doi:10.5194/nhess-2023-133), 2023-08-01
Supplement: Supplementary file [file nhess-2023-133-AC11-supplement.pdf]

1 **Spring water anomalies before two consecutive earthquakes (Mw 7.7 and Mw 7.6)**  
2 **in Kahramanmaraş (Türkiye) on 6 February 2023**

3  
4 Sedat İnan<sup>1,\*</sup>, Hasan Çetin<sup>2</sup>, Nurettin Yakupoğlu<sup>1</sup>

5  
6 <sup>1</sup>Department of Geological Engineering, Istanbul Technical University, Ayazağa,  
7 Istanbul, Türkiye, 34467

8 <sup>2</sup>Department of Geology, Çukurova University, Adana, Türkiye, 01330

9 \*Corresponding Author: sedatinan@itu.edu.tr

10 **ABSTRACT**

11 Understanding earthquake phenomena is always challenging. Search for reliable  
12 precursors of earthquakes are important but requires systematic and long-time monitoring  
13 employing multi-disciplinary techniques. In search of possible precursors, we obtained  
14 commercially bottled spring waters dated before and after the earthquakes of 6 February  
15 2023. Hydrogeochemical precursors have been detected in commercially bottled natural  
16 spring waters (Ayrın Spring and Bahçepınar Spring) which are at a distance of about 100  
17 km and 175 km from the epicenters of the Mw 7.7 and Mw 7.6 Kahramanmaraş (Türkiye)  
18 Earthquakes of 6 February 2023, respectively. The available water samples cover the  
19 period from March 2022 to March 2023. The pre-earthquake anomaly is characterized by  
20 an increase in electrical conductivity and major ions ( $\text{Ca}^{2+}$ ,  $\text{Mg}^{2+}$ ,  $\text{K}^+$ ,  $\text{Na}^+$ ,  $\text{Cl}^-$ , and  $\text{SO}_4^{2-}$   
21 ) compared to the background for Ayrın Spring water samples. The pre-earthquake  
22 anomaly lasted for at least six months. The anomaly in major ions sharply declined and  
23 the ion content approached the background values about two weeks after the  
24 earthquakes. Although only 6.5 kilometers away from the Ayrın Spring, the bottled water  
25 samples of the Bahçepınar Spring did not show any anomalies in electrical conductivity;  
26 therefore, the samples were not analyzed for ion content. Bahçepınar water is collected  
27 from shallow boreholes dug into alluvial deposits which we believe are decoupled from  
28 the basement rocks and this may be the reason for the lack of abnormal water chemistry  
29 prior to the earthquakes. This attests to the fact that sampling locations are very important  
30 in the detection of possible earthquake precursors. Results of the Ayrın spring water  
31 samples indicate that spring water chemical anomalies of discrete samples may provide

32 valuable information on pre-earthquake crustal deformation. Monitoring of spring waters,  
33 along with other monitoring techniques in a multidisciplinary network, and for a sufficiently  
34 long time, could potentially enable obtaining reliable proxy indicators of pre-earthquake  
35 crustal deformation.

36

37 **Keywords:** geochemical anomalies, spring water, earthquake precursors,  
38 Kahramanmaraş earthquakes, East Anatolian Fault Zone (EAFZ), Türkiye

39

## 40 **1. Introduction**

41 Two devastating earthquakes (Mw 7.7 and Mw 7.6) struck the Kahramanmaraş area in  
42 Southern Turkey on 6 February 2023; the earthquakes occurred about 9 hours apart. The  
43 earthquakes caused devastation causing more than 50,000 deaths; leaving behind  
44 thousands injured and/or homeless. Earthquakes of destructive magnitudes (e.g.,  $M > 7$ )  
45 are naturally expected to occur at plate boundary settings (Figure 1) and Kahramanmaras  
46 province is at the junction of the East Anatolian Fault System (EAFS) and the Dead Sea  
47 Fault System (DAFS). However, the reason why such natural events turn into disasters  
48 is mainly due to a lack of preparedness. Where buildings are not built to be sufficiently  
49 earthquake-resistant, monitoring of crustal deformation and searching for reliable pre-  
50 earthquake signals become more important. This is obviously a big challenge for earth  
51 scientists to overcome. Although there is still a long way to go on this front, the scientific  
52 literature is full of scattered but promising and encouraging cases.

53 Earthquakes are complex natural phenomena and their predictions have been long  
54 viewed as difficult, if not impossible (e.g., Geller et al., 1997). Geochemical observations  
55 to identify earthquake precursors were initiated in the late 1960s (Rikitake, 1979; Wakita  
56 1996). Reviewing twenty years of relevant data Turcotte (1991) concluded that large  
57 earthquakes are not preceded by reliable seismic precursors. Moreover, Geller et al.  
58 (1997) claimed that earthquakes can never be predicted. However, for the last few  
59 decades, there have been numerous reports of ground-based anomalies (e.g., changes  
60 in soil gas, water chemistry and ground water level, rock deformation detected by  
61 tiltmeters, electrical and electromagnetic fields) preceding major earthquakes. (including

62 but not limited to Rikitake, 1979; Dobrovolsky et al., 1979; Birchard and Libby, 1978;  
63 Hauksson, 1981; Wakita et al., 1988; Sultankhodhaev, 1984; Thomas et al., 1986;  
64 Rikitake, 1987; Martinelli, and Ferrari, 1991; Etiope et al., 1997; Vallianatos and Tzanis,  
65 1998; Bella et al., 1998; Virk and Singh, 1993; King et al., 1995; Planinic et al, 2004;  
66 Claesson et al., 2004; Vallianatos et al., 2004; Hartmann and Levy, 2006; Papadopoulos  
67 et al., 2006; Uyeda et al., 2008; İnan et al., 2008; Walia et al., 2009; İnan et al., 2010;  
68 İnan et al, 2012a,b,c; Skelton et al., 2014 and 2019; Barberio et al., 2017; He and Singh  
69 2019; Ouzounov et al., 2021; Gori and Barberio, 2022; Xiang and Peng, 2023). Compiling  
70 a review of claimed precursors, Cicerone et al. (2009) conducted a survey of published  
71 scientific literature on earthquake precursors and concluded that precursory anomalies  
72 seem to be recorded where there is modern instrumentation. İnan et al. (2010 and 2012a)  
73 provided hints to select monitoring sites. Recently, Conti et al. (2021) have provided a  
74 short review of ground-based observations before earthquakes

75 Hydro-geochemical anomalies observed prior to seismic events are generally interpreted  
76 to be related to the alteration of the groundwater circulating system by the changes in the  
77 crustal stress/strain before earthquakes and mixing of different aquifers (e.g., Scholz et  
78 al., 1973; Nur, 1974; Sibson et al., 1975; Sugisaki et al., 1996; Tsunogai and Wakita,  
79 1995; Toutain et al., 1997; Claesson et al., 2004; Pérez et al., 2008; İnan et al., 2010;  
80 Grant et al., 2011; İnan et al., 2012c; Doglioni et al., 2014; Ingebritsen and Manga, 2014;  
81 Skelton et al., 2014 and 2019; Barberio et al., 2017; Gori and Barberio, 2022; Xiang and  
82 Peng, 2023). However, another different approach based on “stress-activated positive  
83 hole currents” has been suggested to play a role in the development of physicochemical  
84 pre-earthquake stress indicators (Freund, 2011; Paudel et al., 2018)

85 As suggested by Nur (1974) and later by Rikitake (1987) precursory phenomena may  
86 have a common physical basis which Scholz et al. (1973) called the “Dilatation and water  
87 diffusion (DWD) model”. Roeloffs (1996) noted that with respect to earthquake hydrology,  
88 mechanical and fluid-dynamic effects can be modeled using poroelasticity. More recently,  
89 the DWD model has been explained further (e.g., Doglioni et al., 2014; Wang and Manga,  
90 2021). However, other authors have proposed a fundamentally different approach  
91 (Freund et al., 2006; Freund, 2008; Freund, 2011; Paudel et al., 2018) to study and  
92 evaluate physicochemical pre-earthquake stress indicators. Until the mechanism

93 controlling pre-earthquake processes is fully understood, it is worth noting that the  
94 success of any pre-earthquake stress indicators may be compromised by the ever-  
95 present crustal heterogeneity, anisotropy, and/or crustal blocks (Areshidze et al., 1992;  
96 Tansi et al., 2005; Sol et al., 2007; İnan et al., 2012a; Yu et al., 2023). Microplate and/or  
97 block boundaries are obstacles to pre-earthquake strain to transfer from one block to the  
98 other (İnan et al., 2012a; Yu et al., 2023).

99

100 A multi-disciplinary earthquake observation network (GPS, seismology, soil radon, and  
101 spring water monitoring stations) was established in Kahramanmaraş and surrounding  
102 provinces along the fault zones (Adana, Hatay, Malatya, Elazığ, Bingöl) in 2007 under the  
103 scope of the TURDEP Project (İnan et al. 2007). In the Kahramanmaraş area, due to  
104 seismic gap interpretations, also borehole tilt monitoring stations were established.  
105 Continuous monitoring was continued until the middle of 2012 and valuable multi-  
106 disciplinary data were collected. However, throughout these five years, no earthquake of  
107 significant magnitude (e.g.  $M > 6$ ) occurred to test the usefulness of the monitoring  
108 network, the project was terminated by the funding organization due mainly to a lack of  
109 vision. As a result, the earth science community was caught unprepared when two  
110 consecutive devastating earthquakes struck the area on 6 February 2023. No ground  
111 (except GPS and seismology) monitoring station data were available to detect possible  
112 pre-earthquake anomalies. However, following the Mw 7.7 and Mw 7.6 Kahramanmaraş  
113 earthquakes, we searched for bottled spring waters to analyze in search of possible pre-  
114 earthquake anomalies. This proved difficult as the water supply to the large community  
115 affected by the earthquakes was quite limited and businesses providing bottled spring  
116 waters were also mostly shut down. Finally, we were able to obtain commercially bottled  
117 water samples (dated before and after the earthquake) from the Ayran and Bahçeşinar  
118 springs which are located within about a 6.5-kilometer distance in the Osmaniye Province.  
119 The spring waters are about 100 kilometers and 175 kilometers from the epicenter of the  
120 first (Mw 7.7) and the second (Mw 7.6) earthquakes, respectively (Figure 1B). In this  
121 study, we conducted electrical conductivity ( $E_c$ ) measurements on bottled waters, and  
122 based on the  $E_c$  results, we selected samples for analysis of major ions in water in search

123 of pre-earthquake anomalies. The spring water samples cover the range from March 2022  
 124 to March 2023.

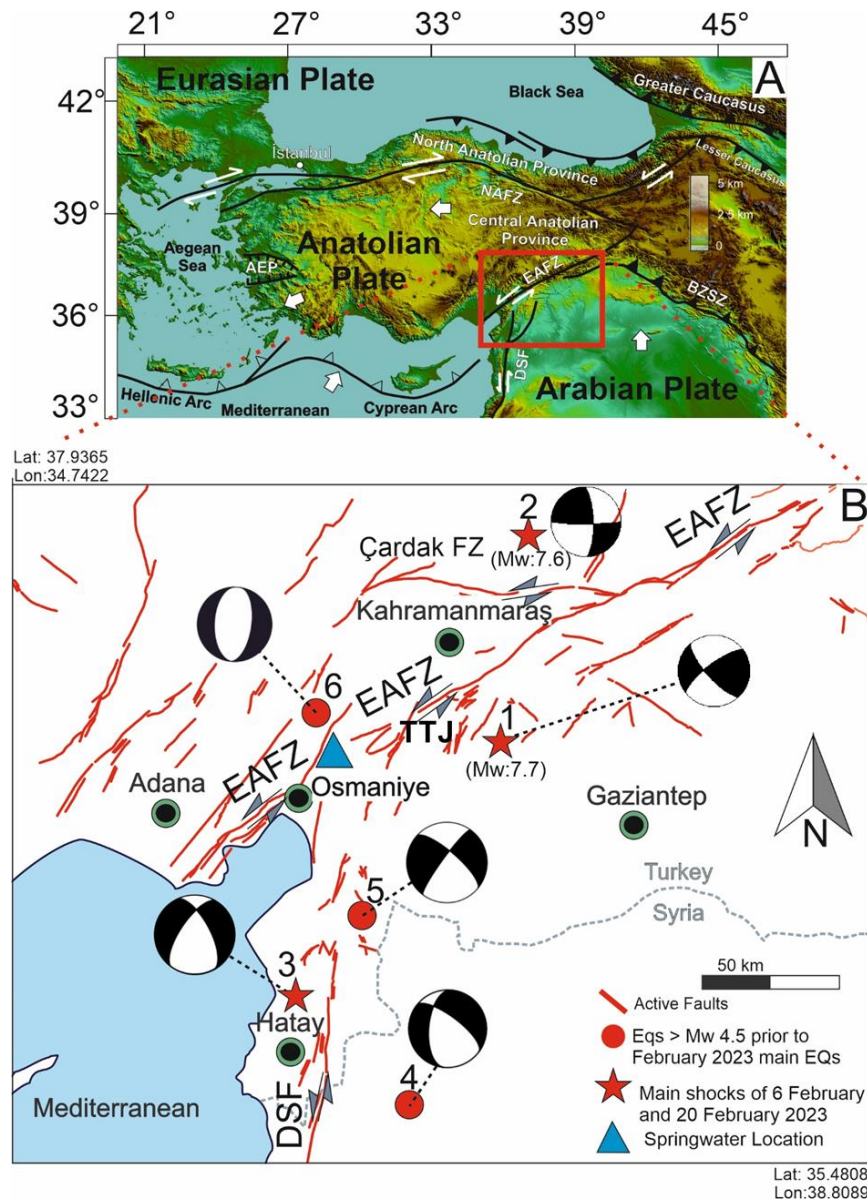

125  
 126 **Figure 1. A)** Neotectonics map of the Türkiye and surroundings (compiled from Sengör  
 127 and Yılmaz, 1981; Sengör et al., 1985; Hancock and Barka, 1987; Şaroğlu et al., 1992;  
 128 Barka and Reilinger, 1997; Bozkurt, 2001). **B)** Active fault map of the region affected by  
 129 the February 2023 Earthquakes (Perinçek and Çemen, 1990; Şaroğlu et al., 1992a; Cetin  
 130 et al., 2003). Red stars show the epicenters of the Mw 7.7 and 7.6 Kahramanmaraş  
 131 Earthquakes of 6 February 2023, and Mw 6.4 Hatay Earthquake of 20 February 2023.  
 132 Filled red circles show the locations of the earthquakes (Mw>4.5) that occurred in the  
 133 area (circle area with a radius of 150 km from the location of the water spring) between  
 134 September 2022 and 5 February 2023. Details of the earthquakes are given in Table 1.

135 TTJ is Türkoğlu Triple Junction. Beach balls are fault plane solutions of earthquakes and  
136 were obtained from the Bogazici University Kandilli Observatory and Earthquake  
137 Research Institute (KOERI) of Turkey; [www.koeri.edu.tr](http://www.koeri.edu.tr)

## 138 **2. Active tectonics of the Kahramanmaraş region**

139 Kahramanmaraş region is located in the suture zone formed by the collision between  
140 Arabian and Anatolian plates during Late Miocene-Pliocene (Figure 1A). After this  
141 collision, very important strike-slip fault zones were developed in the Anatolian plate due  
142 to the continuous northward movement of the Arabian plate and the resulting westward  
143 movement or escape of the Anatolian plate along two major fault zones, the North  
144 Anatolian Fault Zone (NAFZ) and the East Anatolian Fault Zone (EAFZ) (Ketin, 1948;  
145 McKenzie, 1972; Dewey and Şengör, 1979; Şengör and Yılmaz, 1981; Hempton, 1982;  
146 Şengör et al., 1985).

147 The East Anatolian Fault Zone (EAFZ) is approximately 550 km long, northeast-  
148 southwest trending, sinistral strike-slip fault (Figure 1A). It was first described by Allen  
149 (1969) and mapped by Arpat and Şaroğlu (1972). The EAFZ starts from the Karlıova  
150 Triple Junction in the northeast, and it runs in the southwest direction, passes near the  
151 east-southeast of Kahramanmaraş, and joins another triple junction at Türkoğlu (TTJ in  
152 Figure 1B). The EAFZ then continues to the Hatay in the south direction to merge into the  
153 Dead Sea Fault Zone (DSFZ) (Allen, 1969; Arpat and Şaroğlu, 1972; Dewey and Sengör,  
154 1979; Rotstein, 1984; Şengör et al., 1985; Kelling et al., 1987; Şaroğlu et al., 1992a and  
155 1992b; Cetin et al., 2003; Yönlü et al., 2017). There are different interpretations, however,  
156 for the remainder of the fault zone after Türkoğlu Triple Junction (marked as TTJ in Figure  
157 1B). Some studies extend the fault zone southwesterly to the Mediterranean Sea  
158 (McKenzie, 1972; Dewey et al., 1973; Jackson and McKenzie, 1984; Barka and Kadinsky-  
159 Cade, 1988; Karig and Kozlu, 1990; Kempler and Garfunkel, 1991; Westaway and Arger,  
160 1996), joining it with the Cyprian Arc along which the convergence is taking place between  
161 the African and Anatolian plates (McKenzie, 1976; Dewey and Şengör, 1979). Others  
162 think that the fault zone ends around the TTJ (Lovelock, 1984; Chorowicz et al., 1994).  
163 According to Muehlberger and Gordon (1987), the EAFZ becomes the northern branch  
164 of the DSFZ.

165 The seismicity of the study area is controlled by a complex interaction of the African,  
 166 Arabian, and Eurasian plates (McKenzie, 1972). The seismicity of the EAFZ has been  
 167 minimal for most of the last 100 years (Ambraseys, 1989). Historical earthquake records  
 168 show that Kahramanmaraş and its surroundings were affected by two major earthquakes  
 169 in AD 1114 and AD 1513 (Soysal et al., 1981; Ambraseys, 1989). There had been a long  
 170 quiescence of more than 500 years in the Kahramanmaraş area before the Mw 7.7 and  
 171 Mw 7.6 earthquakes struck on 6 February 2023. About one year before these  
 172 earthquakes occurred, the area had been seismically quiet as suggested by only a few  
 173 M>4.5 earthquakes occurring in a circular area with a radius of 150 km; taking the Ayran  
 174 spring water as the center (Figure 1B and Table 1). The fault plane solutions (FPS) for  
 175 earthquakes #3, #4, and #5 suggest mainly normal faulting, whereas, for others  
 176 (earthquakes #1, #2, and #6), FPS suggest movement on dominantly left lateral strike-  
 177 slip faults (Figure 1B) as expected for left-lateral strike-slip nature of the EAFZ.

178 **Table 1.** Earthquakes' time, magnitude, and locations as received from [www.koeri.edu.tr](http://www.koeri.edu.tr).  
 179 Earthquakes #1, #2, and #3 are the earthquakes of February 2023. Earthquakes #4, #5,  
 180 and #6 are those that have occurred in the circular area (with a radius of 150 km from the  
 181 Ayran spring water location) between September 1<sup>st</sup>, 2022 and 5 February 2023. The  
 182 locations of these earthquakes are given on the map (Figure 1B).

| Earthquake # | Magnitude (Mw) | Date       | Time (GMT) | Latitude | longitude |
|--------------|----------------|------------|------------|----------|-----------|
| 1            | 7.7            | 06.02.2023 | 01:17      | 37.1757  | 37.0850   |
| 2            | 7.6            | 06.02.2023 | 10:24      | 38.0818  | 37.1773   |
| 3            | 6.4            | 20.02.2023 | 17:04      | 36.0713  | 36.1012   |
| 4            | 4.6            | 12.01.2023 | 20:40      | 35.5712  | 36.6723   |
| 5            | 4.9            | 18.12.2022 | 18:13      | 36.3978  | 36.4455   |
| 6            | 5.0            | 11.10.2022 | 15:48      | 37.3025  | 36.2403   |

183

### 184 3. Samples and methods

185

#### 186 3.1. Spring water samples

187 The spring water samples were received in commercial polyethylene bottles and brought  
 188 to Istanbul Technical University Laboratory for electrical conductivity measurements and  
 189 major ion analyses. Some of the samples had been bottled up to several months before  
 190 the analyses. However, this does not create any concern because much longer storage

191 in this kind of bottle has been reported to be appropriate in terms of keeping reliable  
192 concentrations (Tsunogai and Wakita, 1995; İnan et al., 2012c; Rapti et al., 2023).

193 The spring water samples cover the range from March 2022 to March 2023. It is worth  
194 noting that the oldest sample predating the earthquakes was AYR 1 (dated 8 March 2022)  
195 from the Ayran Spring. Other bottled water samples we could obtain from both springs  
196 were dated between September 2022 and March 2023. In fact, we could not obtain any  
197 samples dated between 8 March and 14 September 2022. The samples from September,  
198 October, and November 2022 are limited but from December 2022 to January 2023,  
199 available samples are several per month (Table 2).

### 200 **3.2. Spring water analysis**

201 We first screened the bottled water samples by conducting electrical conductivity (Ec)  
202 measurements, and based on the results, we selected samples for analysis of major ions.

203 Samples of the AYR spring water were analyzed by ion chromatography as discussed by  
204 Zeyrek et al. (2010). Briefly, the samples were filtered at 0.45  $\mu\text{m}$  and split into two  
205 portions before analysis using an ion chromatography instrument (Dionex ICS 1000).  
206 Sodium carbonate and methane-sulfonic acid were used as eluents for anion and cation  
207 analyses, respectively. For calibration, DIONEX Certified Reference Standards were  
208 used. Deionized water with a resistance better than 18.2 Megaohm was used for the  
209 preparation of all eluents. Repeated measurements ascertained that the analytical  
210 uncertainties for all anions and cations were below 5%. Electrical conductivity (Ec)  
211 measurements for the bottled Bahçepinar (BPN) spring water samples and both Ec and  
212 Ion analysis results for the bottled Ayran spring waters are listed in Table 2.

### 213 **3.3. Statistical analysis of the data**

214 For the statistical treatment of the data on major ion contents of the water samples, we  
215 calculated the weighted average (weighted compared to the analytical error for each  
216 point) and computed the  $2\sigma$  external error ( $2 \times \alpha e$ ) from the following equation

217



$$\alpha_e = \frac{\sum_{i=1}^n (x_i - \bar{x})^2 / \sigma_i^2}{(n-1) \sum_{i=1}^n 1 / \sigma_i^2}$$

218

219 where  $\bar{x}$  is the average and  $\sigma$  the analytical error on each measured point. The  $2\sigma$  external  
 220 error ( $\alpha_e$ ) considers the general variability of all datasets and the analytical error on each  
 221 point; thus, we obtained the total error envelope for the samples that we consider  
 222 representing background (from 15 February to 31 March 2023; see Table 2 and Figure  
 223 3B).

224

### 225 **3.4.Relation between earthquake magnitude, distance, and precursory duration**

226 Slightly different relations between earthquake magnitude, duration of a precursory  
 227 anomaly, and the distance of the monitoring site to the earthquake epicenter have been  
 228 proposed. Dobrovolsky et al. (1979) proposed a theoretical relation between earthquake  
 229 magnitude and maximum epicentral distance at which geochemical anomalies may be  
 230 observed.

$$231 \quad D = 10^{0.43 * M} \quad (1)$$

232 Relation 1 assumes a homogenous and isotropic crust. Where  $M$  is the earthquake  
 233 magnitude and  $D$  is the distance in kilometers to the earthquake epicenter (Dobrovolsky  
 234 et al., 1979). Rikitake (1987) noted a slightly different relation;

$$235 \quad \log T = a + b * M \quad (2)$$

236 where  $a$  and  $b$  are constants,  $T$  is the duration of anomaly and  $M$  is the magnitude of an  
 237 earthquake (Rikitake, 1987). Moreover, Sultankhodhaev (1984) also reported a relation,  
 238 between earthquake magnitude, the distance of the monitoring site to the earthquake  
 239 epicenter, and duration of precursory anomaly

$$240 \quad \log (DT) = 0.63 * M - b \quad (3)$$

241 where  $D$  is the distance in km,  $T$  is the duration of a precursory anomaly in days, and  $M$   
 242 is earthquake magnitude;  $b$  is a constant taken as 0.15 Sultankhodhaev (1984).

243 All of these three relations provide a helpful initial idea about what to expect of precursory  
244 anomalies in terms of duration and distance to the earthquake epicenter. The closer the  
245 epicenter of an earthquake of a given magnitude, the longer duration of anomaly at  
246 monitoring site.

247 Obviously, we should keep in mind that the relations proposed by Dobrovolsky et al.  
248 (1979), Sultankhodhaev (1984), and Rikitake (1987) assume homogenous and isotropic  
249 crust where pre-earthquake stress and resultant strain propagates in all directions. In  
250 fact, we know that this assumption is not totally correct as microplates and/or block  
251 boundaries hinder stress transfer (e.g., İnan et al. 2012b). This issue should be seriously  
252 considered and care should be exercised.

253 İnan et al. (2008 and 2010) verified Dobrovolsky et al.'s (1979) relation for medium-size  
254 earthquakes ( $M < 5.3$ ). Accordingly, for an earthquake of magnitude 4.5, the maximum  
255 distance for detection of possible geochemical anomalies in the Ayran Spring water will  
256 be about 100 km. For contingency, we took a 150 km radius and listed in Table 1 the  
257 earthquakes with  $M > 4.5$  occurring between September 2022 and 5 February 2023 in  
258 order to compare with the water geochemical data we obtained in this study.

259

#### 260 **4. Results and Discussion**

261

262 The bottled water samples from the Bahcepinar (BPN) Spring did not show any  
263 meaningful (e.g., significant) variations in electrical conductivity ( $E_c$ ) values; varying in a  
264 narrow range between 220 and 230 microsiemens/cm (Table 2). Therefore, these  
265 samples were not analyzed for major ions content because change (increase/decrease)  
266 of major ions contents is expected to result in  $E_c$  variation (İnan et al., 2010; İnan et al.,  
267 2012c). However, the bottled water samples from the Ayran (AYR) spring showed major  
268 variations in the  $E_c$  values; varying in range between 50 and 200 microsiemens/cm.  
269 Therefore, the AYR samples were analyzed for major ions. Possible reasons for not  
270 detecting any anomaly in the  $E_c$  measurements of the BNP spring water samples have  
271 been investigated. The investigation suggests that the reason may be the geological

272 environment of the springs. The AYR spring water emanates from Middle-Upper  
273 Ordovician age metamorphic rocks (Kardere Formation) made up of quartzite,  
274 metasediments, metasiltstone, and metashale (Usta et al., 2015 and 2017), whereas the  
275 BPN spring water is collected from shallow boreholes dug into valley-filling Quaternary  
276 age alluvial deposits that are underlain by ophiolite (Figure 2). The alluvial deposits reach  
277 a thickness of about two hundred meters and the water reservoir within the alluvium  
278 deposit is fed by precipitation and a nearby Bekdemir stream flowing towards the alluvial  
279 deposit. It is interesting that the streams disappear to the south; suggesting that the  
280 stream (creek) water is captured by the alluvial deposit. Since the BPN water is collected  
281 from shallow boreholes (less than 100 meters) dug into alluvial deposits, we believe that  
282 the alluvial deposits are decoupled from the basement rocks (which undergo pre-  
283 earthquake stress) and this may be the reason for the lack of anomaly in water chemistry  
284 prior to the earthquakes. This has testified again to the importance of adequate geological  
285 knowledge of the area before sampling discrete geochemical samples (water or soil gas)  
286 and/or continuous monitoring in search of pre-earthquake signals (İnan et al., 2008; İnan  
287 et al., 2010).

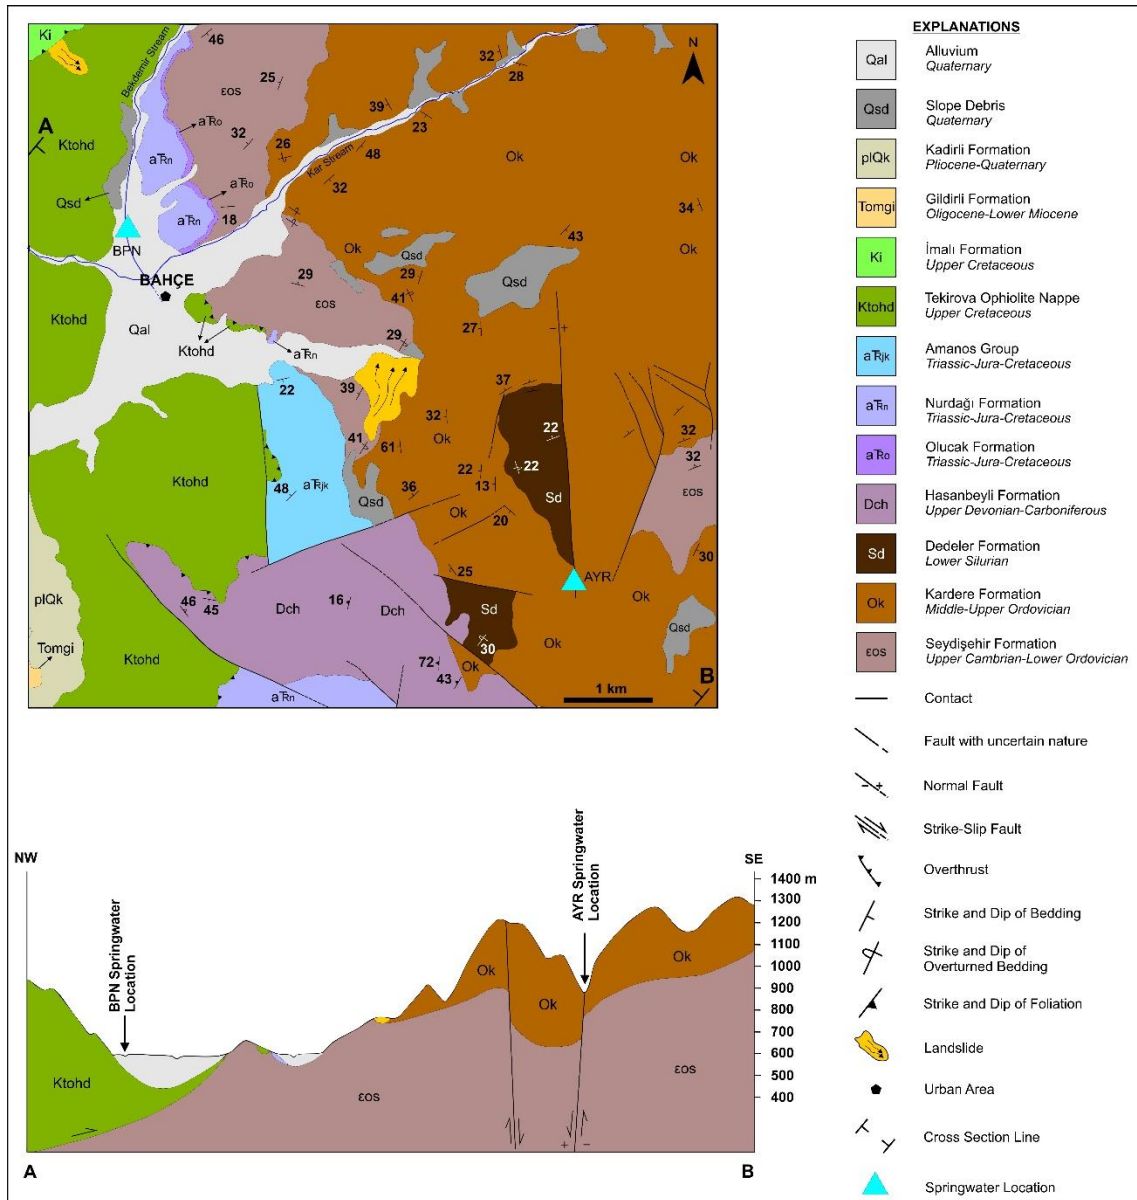

288

289 **Figure 2.** Locations and local geology of the water springs. (Modified from Usta et al.,  
 290 2015 and 2017). The Ayran spring water emanates from a fault in the Metamorphic  
 291 Kardere Formation (blue triangle shown at the lower right in the map) whereas the  
 292 Bahçepınar spring water is obtained from the Quaternary Alluvium (blue triangle shown  
 293 at the upper left in the map).

294

295 Variations of major ions in the AYR spring water samples were significant. It is clear that  
 296 pre-earthquake anomalies have exceeded the  $\alpha_e$  (Figures 3B and Table 2). Before any  
 297 interpretation, we needed to make sure that geochemical time series are not affected by  
 298 meteorological conditions. In this context, meteorological data were obtained from the

299 Osmaniye Meteorology Station (located about 32 km SW of the AYR spring) and the daily  
 300 average air temperature and rainfall are shown in Figure 3c.

301 **Table 2.** Ec and major ion analysis results for the Ayran (AYR) and the Ec analysis results  
 302 for the Bahçepınar (BPN) bottled waters. The data for Ca<sup>2+</sup>, Mg<sup>2+</sup>, K<sup>+</sup>, Na<sup>+</sup>, Cl<sup>-</sup>, SO<sub>4</sub><sup>2-</sup> for  
 303 the AYR samples are plotted in Figure 3B. Standard deviation (2σ) has been computed  
 304 considering cations/anions contents of samples dated from 15 February to 31 March  
 305 2023; the period which is considered to nearly represent background concentrations of  
 306 the water. These samples are marked in bold fonts.

| Sample ID     | Date              | Cl <sup>-</sup> | SO <sub>4</sub> <sup>2-</sup> | Na <sup>+</sup> | K <sup>+</sup> | Mg <sup>2+</sup> | Ca <sup>2+</sup> | AYR Ec     | Date       | BPN Ec |
|---------------|-------------------|-----------------|-------------------------------|-----------------|----------------|------------------|------------------|------------|------------|--------|
| AYR 1         | 08.03.2022        | 2.99            | 8.34                          | 4.34            | 0.39           | 3.22             | 6.92             | 50         | 19.09.2022 | 220    |
| AYR 2         | 14.09.2022        | 7.37            | 13.08                         | 12.10           | 1.08           | 7.73             | 17.54            | 150        | 07.11.2022 | 230    |
| AYR 3         | 06.10.2022        | 9.73            | 14.79                         | 15.08           | 1.34           | 9.20             | 20.10            | 180        | 12.12.2022 | 230    |
| AYR 4         | 03.11.2022        | 9.99            | 15.52                         | 15.66           | 1.39           | 9.50             | 20.72            | 170        | 19.12.2022 | 220    |
| AYR 5         | 13.12.2022        | 7.45            | 13.43                         | 11.93           | 1.05           | 7.59             | 16.58            | 150        | 30.12.2022 | 220    |
| AYR 6         | 26.12.2022        | 11.06           | 17.35                         | 16.49           | 1.56           | 10.19            | 22.19            | 190        | 08.01.2023 | 220    |
| AYR 7         | 29.12.2022        | 11.08           | 17.20                         | 16.84           | 1.50           | 10.20            | 22.33            | 180        | 20.01.2023 | 220    |
| AYR 8         | 30.12.2022        | 10.97           | 17.29                         | 16.78           | 1.50           | 10.17            | 22.28            | 190        | 24.01.2023 | 220    |
| AYR 9         | 03.01.2023        | 10.62           | 17.23                         | 16.26           | 1.45           | 10.06            | 23.04            | 170        | 28.01.2023 | 220    |
| AYR 10        | 06.01.2023        | 11.12           | 17.56                         | 16.91           | 1.49           | 10.29            | 22.51            | 190        | 04.02.2023 | 220    |
| AYR 11        | 11.01.2023        | 11.41           | 17.96                         | 16.90           | 1.50           | 10.43            | 22.81            | 190        | 11.02.2023 | 220    |
| AYR 12        | 12.01.2023        | 11.60           | 18.21                         | 17.22           | 1.53           | 10.50            | 22.99            | 200        | 17.02.2023 | 220    |
| AYR 13        | 27.01.2023        | 9.83            | 16.20                         | 14.24           | 1.25           | 8.89             | 19.35            | 160        | 18.02.2023 | 230    |
| AYR 14        | 31.01.2023        | 11.04           | 17.62                         | 15.81           | 1.39           | 9.87             | 21.58            | 180        | 02.03.2023 | 230    |
| AYR 15        | 01.02.2023        | 11.43           | 17.85                         | 16.21           | 1.43           | 10.04            | 21.97            | 190        | 13.03.2023 | 220    |
| AYR 16        | 10.02.2023        | 9.09            | 15.59                         | 13.29           | 1.16           | 8.46             | 18.33            | 180        | 22.03.2023 | 230    |
| AYR 17        | 12.02.2023        | 6.00            | 12.47                         | 9.36            | 0.79           | 6.29             | 13.51            | 120        |            |        |
| AYR 18        | 13.02.2023        | 4.25            | 10.69                         | 6.96            | 0.56           | 4.95             | 10.38            | 90         |            |        |
| <b>AYR 19</b> | <b>15.02.2023</b> | <b>3.54</b>     | <b>10.30</b>                  | <b>6.28</b>     | <b>0.50</b>    | <b>4.79</b>      | <b>9.65</b>      | <b>80</b>  |            |        |
| <b>AYR 20</b> | <b>16.02.2023</b> | <b>3.56</b>     | <b>13.64</b>                  | <b>7.51</b>     | <b>0.67</b>    | <b>6.91</b>      | <b>12.60</b>     | <b>110</b> |            |        |
| <b>AYR 21</b> | <b>28.02.2023</b> | <b>3.29</b>     | <b>10.54</b>                  | <b>5.79</b>     | <b>0.47</b>    | <b>4.60</b>      | <b>9.23</b>      | <b>80</b>  |            |        |
| <b>AYR 22</b> | <b>02.03.2023</b> | <b>3.26</b>     | <b>10.08</b>                  | <b>5.48</b>     | <b>0.44</b>    | <b>4.20</b>      | <b>8.59</b>      | <b>70</b>  |            |        |
| <b>AYR 23</b> | <b>11.03.2023</b> | <b>3.36</b>     | <b>9.85</b>                   | <b>5.49</b>     | <b>0.43</b>    | <b>4.21</b>      | <b>8.62</b>      | <b>70</b>  |            |        |
| <b>AYR 24</b> | <b>13.03.2023</b> | <b>3.28</b>     | <b>9.91</b>                   | <b>5.47</b>     | <b>0.44</b>    | <b>4.22</b>      | <b>8.68</b>      | <b>70</b>  |            |        |
| <b>AYR 25</b> | <b>20.03.2023</b> | <b>3.28</b>     | <b>9.96</b>                   | <b>5.36</b>     | <b>0.43</b>    | <b>4.22</b>      | <b>8.73</b>      | <b>70</b>  |            |        |
| <b>AYR 26</b> | <b>24.03.2023</b> | <b>3.20</b>     | <b>10.02</b>                  | <b>5.35</b>     | <b>0.42</b>    | <b>4.14</b>      | <b>8.45</b>      | <b>70</b>  |            |        |
| <b>AYR 27</b> | <b>31.03.2023</b> | <b>3.31</b>     | <b>10.13</b>                  | <b>5.40</b>     | <b>0.43</b>    | <b>4.16</b>      | <b>8.47</b>      | <b>70</b>  |            |        |
|               | <i>mean</i>       | 0.37            | 1.13                          | 0.60            | 0.05           | 0.46             | 0.94             | 7.78       |            |        |
|               | Σ                 | 0.33            | 1.19                          | 0.79            | 0.08           | 0.88             | 1.34             | 13.64      |            |        |
|               | 2σ                | 0.65            | 2.38                          | 1.57            | 0.17           | 1.76             | 2.68             | 27.28      |            |        |
|               | <i>mean +1 σ</i>  | 3.64            | 11.32                         | 6.19            | 0.51           | 5.04             | 9.81             | 83.64      |            |        |
|               | <i>mean +2 σ</i>  | 2.99            | 8.94                          | 4.62            | 0.35           | 3.28             | 7.13             | 56.36      |            |        |

307  
 308 Air temperature gradually decreases from about 30°C in September 2022 to less than  
 309 10°C in February 2023 (Figure 3C). Daily rainfall is noticeably present in November 2022  
 310 and March 2023. Normally, variations in air temperature are not expected to affect the  
 311 chemical contents of the spring water (İnan et al., 2010 and 2012) but the effect of rainfall

312 on soil radon concentration is dominant (Inan et al., 2008, 2010, 2012b, Seyis et al.,  
313 2022). All earthquakes listed in Table 1 are plotted on the meteorology time series in  
314 Figure 3C and this shows that major and heavy rainfall took place right after the  
315 devastating earthquakes of 6 February 2023. Based on the relatively low EC and low  
316 major ion contents of the AYR spring water (Table 2) that is bottled and commercially  
317 distributed, it can be said that this water is of shallow origin (Di Luccio et al., 2018). A  
318 comparison of the geochemical time series and significant variations shown in Figure 3B  
319 and the daily average rainfall data shown in Figure 3C reveals no correlations. Inan et al.  
320 (2010 and 2012) compared meteorological time series with hydrogeochemical time series  
321 and noted that meteorological conditions do not seem to play a role in water's major ion  
322 contents. In this study, we compare rainfall data and geochemical time series (Figure 3)  
323 and, as there is no correlation, we conclude that the increase of major ion contents  
324 observed in AYR spring waters are not related to atmospheric variations (e.g., rainfall).  
325 Therefore, it is safe to conclude that the chemical changes recorded in the spring water  
326 must be related to crustal deformation associated with earthquake stress buildup.

327 As shown in Figure 3B, changes in the concentration of the major ionic species dissolved  
328 in the AYR spring water were observed. Positive anomalies are recorded in the  $\text{Ca}^{2+}$ ,  
329  $\text{Mg}^{2+}$ ,  $\text{K}^+$ ,  $\text{Na}^+$ ,  $\text{Cl}^-$ , and  $\text{SO}_4^{2-}$  contents (mg/l) before the 6 February Mw 7.7 and 7.6  
330 Kahramanmaraş Earthquakes (Figure 3b; Table 2). These positive anomalies (increase  
331 in dissolved ion content) started as early as September 2022; suggesting a pre-  
332 earthquake anomaly of nearly six months. Considering Sultankhodhaev's (1984) relation  
333 ( $\log(\text{DT}) = 0.63 * M - b$ ) between earthquake magnitude, precursory anomaly duration,  
334 and the distance of the earthquake epicenter to the monitoring site, such a long duration  
335 (six months) of a precursory anomaly we report in this study is very likely because the  
336 magnitudes of the 7.7 and 7.6 devastating earthquakes are sufficiently big to cause such  
337 a long precursory anomaly at a location about 100 km from the epicenter. Considering  
338 the relation proposed by Sultankhodhaev (1984), such a magnitude of the earthquake  
339 theoretically should lead to months-long of precursory anomaly in the geochemical  
340 parameters at locations hundreds of kilometers far from the epicentral area. For instance,  
341 in Western Turkey, Inan et al. (2010) reported 32 days of chemical anomaly at a water  
342 monitoring site located 32 kilometers from the epicenter of a M 4.2 earthquake.

343 In regard to changes in the dissolved ions in the AYR spring water, the following changes  
344 are prominent. The  $\text{Ca}^{2+}$  and  $\text{Na}^+$  content increase (for the period between September  
345 2022 to 15 February 2023) above the background by about 14 (mg/l) and 10 (mg/l),  
346 respectively, and reach up to 22 (mg/l) and 16 (mg/l), respectively. This increase started  
347 about six months before the 6 February earthquakes (EQ # 1 and EQ #2). Since we could  
348 not obtain samples between 8 March 2022 and 14 September 2022, the anomaly could  
349 have possibly started even earlier (any time between March and August 2022); so the  
350 positive anomaly (e.g., increase) in the major ions started at least six months before the  
351 6 February 2023 earthquakes. The  $\text{Mg}^{2+}$  content also increased from about 4 (mg/l) to 10  
352 (mg/l) in the period September 2022 to 15 February 2023. Similar major increases were  
353 also detected in  $\text{Cl}^-$ , and  $\text{SO}_4^{2-}$  contents. Water samples are relatively poor in  $\text{K}^+$  content  
354 therefore the increase, due to the scale of the graph, is not very obvious in Figure 3B.  
355 However, the values given in Table 2 clearly indicate about four times an increase in the  
356  $\text{K}^+$  content compared to the background concentrations (post-seismic samples collected  
357 between February 15 and 31 March 2023).

358 The pre-earthquake anomaly in the AYR water samples is characterized by an increase  
359 of up to 400% for the Ec and also major ions; namely  $\text{Ca}^{2+}$ ,  $\text{Mg}^{2+}$ ,  $\text{K}^+$ ,  $\text{Na}^+$ ,  $\text{Cl}^-$ , and  $\text{SO}_4^{2-}$   
360 before the 6 February 2023 Mw 7.7 and Mw 7.6 earthquakes (Figure 3B). It is worth noting  
361 that the Ec values and major ion concentrations for the Ayran spring waters show similar  
362 trends. Post-earthquake samples show decreasing trends in all major ions. Analyses  
363 results of the post-earthquake dated samples show that the spring water has had  
364 chemical stability since the Middle February-Early March 2023; just two to three weeks  
365 after the earthquakes (Figure 3B). We have also obtained a chemical analysis report on  
366 AYR water submitted with the business license application of the company dated 29  
367 August 2012. The chemical analysis data of the samples collected more than 10 years  
368 ago include values only for  $\text{Na}^+$ ,  $\text{Cl}^-$ , and  $\text{SO}_4^{2-}$  as 3.86, 3.12, and 8.37 mg/l, respectively.  
369 These values are very close to the analysis result of the AYR water sample dated 8 March  
370 2022 (AYR 1 which is the oldest sample in our data set) and the AYR water samples  
371 collected after 15 February (Table 2); confirming that these samples represent  
372 background values for the AYR spring water.

373 Immediately after the earthquake, the values started to decrease suggesting a reversible  
374 chemical change (Figure 3B; Table 2). It is worth mentioning that the broad positive  
375 anomaly detected in the AYR water chemistry (Figure 3B) that lasted for about six months  
376 before the Mw 7.7 and Mw 7.6 earthquakes shows some transient decreases (about  
377 Middle December 2022 and toward the end of January 2023). Following each transient  
378 decrease, an increase in ion contents is observed and the broad positive anomaly  
379 (starting from September 2022) is sustained until the date of the major earthquakes of 6  
380 February 2023. The observations of sudden decrease and rebound in the major ion  
381 contents of the water samples (taking place in Mid December 2022 and end of January  
382 2023) may suggest sudden and short-lived crustal stress release related to smaller  
383 earthquakes (e.g., EQ # 4 and EQ # 5). Soon after the major earthquakes (EQ # 1 and  
384 EQ # 2), the major ion contents of the water samples show a sharp decline; almost  
385 approaching the background values as early as 15 February 2023. One single positive  
386 anomaly after the major earthquakes (EQ #1 and EQ #2) is detected in the sample dated  
387 16 February 2023. The further increase of the ion contents of this sample seems to  
388 suggest a short-term stress buildup prior to EQ # 3 (Mw 6.4) that occurred about 120 km  
389 to the south of the Ayran Spring water location (Figure 1B). Considering Dobrovolsky et  
390 al.'s (1979) theoretical relation ( $R= 10^{0.43*M}$ ), an increase in major ions contents of the  
391 Ayran Spring water is very likely to take place due to an earthquake of magnitude 6.4  
392 occurring in 120 km distance.

393

394



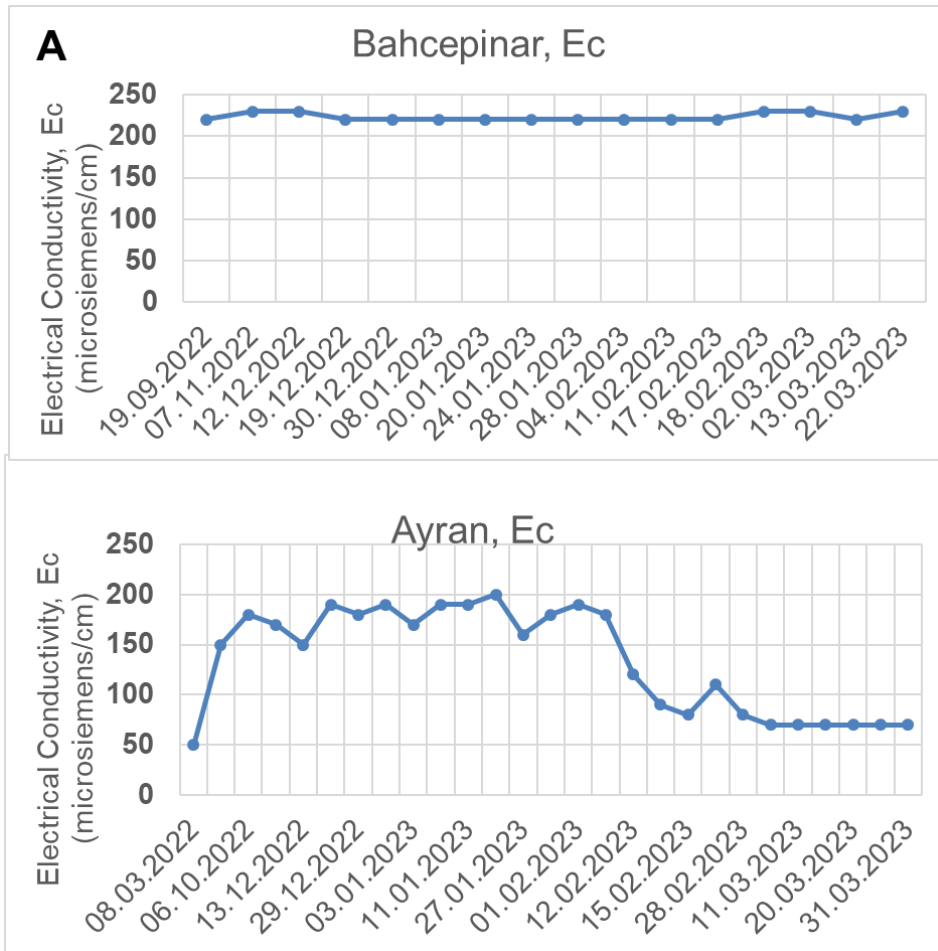

395

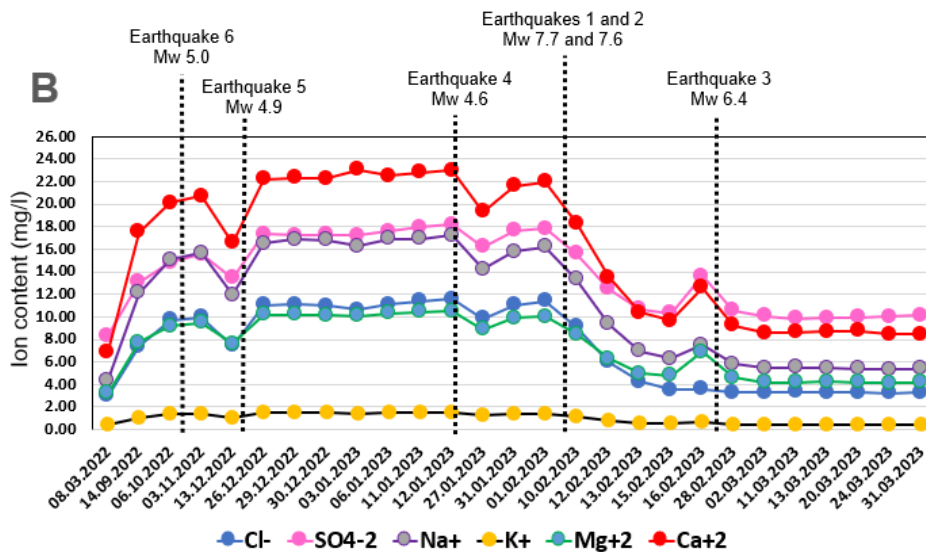

396

397 **Figure 3.** Time variation graphs of Ec for the Ayran (AYR) and the Bahçepinar (BPN)  
 398 bottled waters (A) and major ions for the AYR bottled waters (B). All data are listed in  
 399 Table 2.

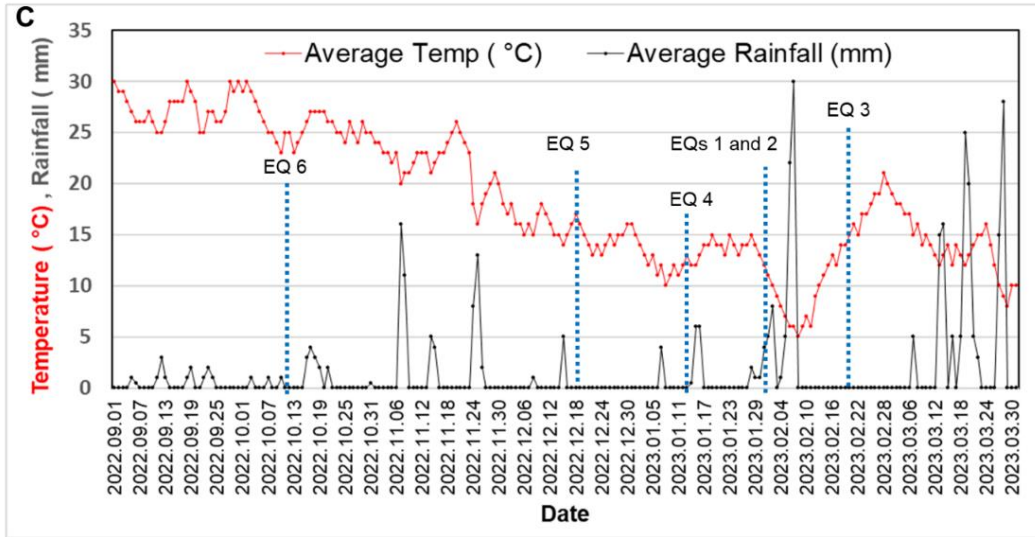

400

401 **Figure 3. Cont.** Daily average air temperature and rainfall at the Osmaniye meteorology  
 402 station (37°07'N, 36°25'E; 32 km SW of the Ayran spring) between 1 September 2022  
 403 and 30 March 2023 (C).

404 ([https://www.meteoblue.com/tr/hava/historyclimate/weatherarchive/  
 405 osmaniye\\_turkiye\\_303195](https://www.meteoblue.com/tr/hava/historyclimate/weatherarchive/osmaniye_turkiye_303195)). EQ1 through EQ6 are the earthquakes listed in Table 1.

406

407 We have shown and discussed the reliable precursory anomalies in the major ions of the  
 408 bottled AYR spring water prior to the Mw 7.7 and Mw 7.6 earthquakes that occurred in  
 409 the Kahramanmaraş region on 6 February 2023. However, the process(es) leading to the  
 410 build-up of geochemical anomalies related to the earthquake cannot be inferred with  
 411 certainty. However, some inferences based on previous observations can be made. For  
 412 instance, Sibson (1992) suggested that extensive hydro-fracture dilatancy might develop  
 413 prior to failure leading to the earthquake. Development of fractures probably enhances  
 414 water circulation and mixing of different reservoirs leading to pre-earthquake anomalies  
 415 (Italiano et al., 2004; Federico et al., 2008; İnan et al., 2010; İnan et al., 2012c; Skelton  
 416 et al., 2014; Ingebritsen and Manga, 2014; Doglioni et al., 2014; Barberio et al., 2017;  
 417 Skelton et al., 2019; Wang and Manga, 2021; Gori and Barberio, 2022;). Although the  
 418 process(es) responsible for chemical anomalies detected in the Ayran spring waters prior  
 419 to the 6 February 2023 earthquakes cannot be suggested with any certainty at this stage,  
 420 two immediate mechanisms emerge: 1) a simple increase in fluid flow in the surrounding  
 421 of the future epicenter and selective dissolution of some K–Mg–Ca-rich rocks (Federico

422 et al., 2008); or 2) “electro-corrosion” whereby the dissolution of rocks is accelerated by  
423 the flow of stress-activated positive hole currents (Balk et al., 2009; Freund, 2011; Paudel  
424 et al., 2018). Following the second mechanism, the increased content of major ions in  
425 water could be related to the oxidation of water to hydrogen peroxide at the rock-water  
426 interface (Balk et al., 2009; Paudel et al., 2018). Freund (2011) suggested that with the  
427 positive hole current flowing, the “corrosion” of the rock is accelerated releasing into the  
428 water major cations and anions. Further work to be conducted in this area may enable us  
429 to suggest the process(es) responsible for the pre-earthquake geochemical anomalies  
430 we have discussed in the AYR spring water.

431

## 432 **5. Conclusions**

433

434 Hydrogeochemical precursors have been detected in commercially bottled water samples  
435 of natural springs (Ayran Spring and Bahçepinar Spring) emanating from a location about  
436 100 km distance from the epicenter of the Mw 7.7 Kahramanmaraş Earthquake of 6  
437 February 2023. The pre-earthquake anomaly is characterized by an increase in  $\text{Ca}^{2+}$ ,  
438  $\text{Mg}^{2+}$ ,  $\text{K}^+$ ,  $\text{Na}^+$ ,  $\text{Cl}^-$ , and  $\text{SO}_4^{2-}$  content in the bottled water samples of the Ayran spring.  
439 Samples that are dated after the earthquakes (covering about two months after the  
440 earthquake) show decreasing trends in all major ions. About three weeks after the  
441 earthquake, the major ion contents of the spring water attained stability. At least six  
442 months of pre-earthquake anomaly (increase) in the major ions content of the Ayran  
443 spring water is prominent. It is worth noting that the Bahçepinar Spring water samples did  
444 not show any anomalies in electrical conductivity therefore the samples were not  
445 analyzed for ion content. Bahçepinar water is collected from shallow boreholes dug into  
446 alluvial deposits which, we believe, are decoupled from the basement rocks and this may  
447 be the reason for the lack of any significant change in the water chemistry prior to the  
448 earthquakes. Here, we remind that geological knowledge of the investigated area and the  
449 sampling site have paramount importance in sampling discrete samples for geochemical  
450 analysis and/or conducting continuous monitoring. The results of this study suggest that  
451 spring water chemical anomalies may be monitored as proxy indicators of pre-earthquake

452 crustal deformation. The physical mechanisms of the observed precursors are yet  
453 impossible to explain with certainty at this stage. In order to be able to suggest the  
454 mechanism(s) leading to the reported pre-earthquake geochemical anomalies, more work  
455 needs to be conducted; especially multi-disciplinary (seismological, geodetical,  
456 geochemical) and continuous earthquake monitoring networks must be established and  
457 run for a sufficiently long time.

458

### 459 **Acknowledgements**

460 We appreciate all the technical help we have received on ion chromatography analyses  
461 from Ms. Sevde Korkut at the Istanbul Technical University MEM-TEK laboratory. We  
462 thank Mr. Asen Sabuncu (Istanbul Technical University) and Dr. Teach. Assist. Emre  
463 Pınarcı (Çukurova University) for help in drafting the figures. We also thank Assoc. Prof  
464 Dr. Tülay İnan for help in conducting electrical conductivity measurements of the bottled  
465 water samples. We thank Prof. Dr. Filippos Vallianatos for editorial handling. We also  
466 appreciate constructive reviews by Dr. Giovanni Martinelli, Dr. Vivek Valia, and two  
467 anonymous reviewers that helped us improve the manuscript. This work has been  
468 partially supported by Istanbul Technical University Scientific Research Fund (ITU  
469 BAPSIS) Project # 44774.

### 470 **Authors contributions**

471 S.I. and H.C. conceived the project; H.C. collected the samples; N.Y. coordinated  
472 laboratory analysis, compiled seismic events, and prepared the figures; S.I. was the  
473 primary interpreter of the data. S.I. and H.C. were writers of the manuscript with  
474 contributions from N.Y.

### 475 **References**

476 Allen, C.R.: Active faulting in northern Turkey, Division of Geological Sciences, California  
477 Institute of Technology, Contribution No. 1577. 32 pp, 1969.

478 Ambraseys, N.N.: Temporary seismic quiescence: SE Turkey. *Geophys. J. Int.*, 96, 311–  
479 331, <https://doi.org/10.1111/j.1365-246X.1989.tb04453.x>, 1989.

480 Areshidze, G., Bella, F., Biagi, P. F., Caputo, M., Della Monica, G., Ermini, A.,  
481 Manjgaladze, P., Melikazdze, G., Sgrigna, V. and Zilpimani, D.: No preseismic evidence  
482 from hydrogeochemical parameters on the occasion of April 29, 1991 Georgian  
483 Earthquake, Caucasus, Tectonophysics, 213, 353–358, [https://doi.org/10.1016/0040-](https://doi.org/10.1016/0040-1951(92)90463-Gö)  
484 [1951\(92\)90463-Gö](https://doi.org/10.1016/0040-1951(92)90463-Gö) 1992.

485 Arpat, E., Şaroğlu, F.: Dogu Anadolu fayı ile ilgili bazı gözlem ve düşünceler (Some  
486 observations and thoughts on the East Anatolian fault). Bulletin of the General Directorate  
487 of Mineral Research and Exploration of Turkey (MTA) 73, 44–50, 1972.

488 Balk, M., Bose, M., Ertem, G., Rogoff, D. A., Rothschild, L. J. and Freund, F.T.: Oxidation  
489 of water to hydrogen peroxide at the rock-water interface due to stress-activated electric  
490 currents in rocks, Earth Planet Sc. Lett., 283, 87–92.  
491 <https://doi.org/10.1016/j.epsl.2009.03.044>, 2009.

492 Barberio, M.D., Barbieri, M., Billi, A., Doglioni, C., Petitta, M.: Hydrogeochemical changes  
493 before and during the 2016 Amatrice-Norcia seismic sequence (central Italy). Sci. Rep-  
494 UK, 7, 11735. <https://doi.org/10.1038/s41598-017-11990-8>, 2017.

495 Barka, A. A. and Reilinger, R.: Active tectonics of the Eastern Mediterranean region  
496 deduced from GPS, neotectonic and seismicity data, Ann. Geophys-Italy, 40, 587-610,  
497 <http://hdl.handle.net/2122/1520>, 1997.

498 Barka, A.A., Kadinsky-Cade, K.: Strike-slip fault geometry in Turkey and its influence on  
499 earthquake activity, Tectonics, 7, 663–684, <https://doi.org/10.1029/TC007i003p00663>,  
500 1988.

501 Bella, F., Biagi, P.F., Caputo, M., Cozzi, Della Monica, G., Ermini, A., Gordeez, E.I.,  
502 Khatkevich, Y.M., Martinelli, G., Plastino, W., Scandone, R., Sgrigna, V., Zilpimiani, D.:  
503 Hydrogeochemical anomalies in Kamchatka (Russia), Phys. Chem. Earth., 23, 921-925,  
504 [https://doi.org/10.1016/S0079-1946\(98\)00120-7](https://doi.org/10.1016/S0079-1946(98)00120-7), 1998.

505 Birchard, G.F., Libby, W.F.: Earthquake associated radon anomalies possible  
506 mechanisms, Eos Trans. AGU 59, 4, 329, 1978.

507 Bozkurt, E.: Neotectonics of Turkey—a synthesis, Geodin. Acta, 14, 3–30,  
508 <https://doi.org/10.1080/09853111.2001.11432432>, 2001.

509 Cetin, H., Guneyli, H., Mayer, L.: Paleoseismology of the Palu–Lake Hazar segment of  
510 the East Anatolian Fault Zone, Turkey, Tectonophysics 374, 163–197,  
511 <http://dx.doi.org/10.1016/j.tecto.2003.08.003>, 2003.

512 Chorowicz, J., Luxey, P., Lyberis, N., Carvalho, J., Parrot, J.F., Yurur, T. and Gundogdu,  
513 N.: The Maras Triple Junction (southern Turkey) based on digital elevation model and  
514 satellite imagery interpretation, J. Geophys. Res., 99, B10, 20225–20242,  
515 <https://doi.org/10.1029/94JB00321>, 1994.

516 Cicerone, R.D., Ebel, J.E., Britton, J.: A systematic compilation of earthquake precursors,  
517 Tectonophysics, 476, 371-396. <https://doi.org/10.1016/j.tecto.2009.06.008>, 2009.

518 Claesson, L., Skelton, A., Graham, C., Dietl, C., Mörth, M., Torssander, P., Kockum, I.:  
519 Hydrogeochemical changes before and after a major earthquake, Geology, 32, 641-644,  
520 <https://doi.org/10.1130/G20542.1>, 2004.

521 Conti, L., Picozza, P., Sotgiu, A.: A critical review of ground-based observations of  
522 earthquake precursors, Front. Earth Sci., 9, <https://doi.org/10.3389/feart.2021.676766>,  
523 2021.

524 Dewey, J.F. and Şengör, A.M.C.: Aegean and surrounding regions: complex multi-plate  
525 and continuum tectonics in a convergent zone, Geol. Soc. Am. Bull., 90, 84–92,  
526 <https://doi.org/10.1130/00167606%281979%2990%3C84%3AAASRCM%3E2.0.CO%3B2>,  
527 1979.

528 Dewey, J.F., Pitman, W.C., Ryan, W.B.F., Bonnin, J.: Plate tectonics and the evolution of  
529 the Alpine system. Geol. Soc. Am. Bull., 84, 3137–3180, [https://doi.org/10.1130/0016-7606\(1973\)84%3C3137:PTATEO%3E2.0.CO;2](https://doi.org/10.1130/0016-7606(1973)84%3C3137:PTATEO%3E2.0.CO;2), 1973.

531 Di Luccio, F., Chiodini, G., Caliro, S., Cardellini, C., Convertito, V., Pino, N.A., Tolomei,  
532 C., Ventura, G.: Seismic signature of active intrusions in mountain chains. Science  
533 Advances 4, e1701825. <https://doi.org/10.1126/sciadv.1701825>, 2018.

534 Dobrovolsky, I.P., Zubkov, S.I. and Miachkin, V.I.: Estimation of the size of earthquake  
535 preparation zones, Pure and Applied Geophysics 117, 1025-1044,  
536 <https://doi.org/10.1007/BF00876083>, 1979.

537 Doglioni, C., Barba, S., Carminati, E., Riguzzi, F.: Fault on–off versus coseismic fluids  
538 reaction, Geosci. Front., 5 (6), 767–780, <https://doi.org/10.1016/j.gsf.2013.08.004>, 2014.

539 Etiope, G., Calcara, M. and Quattrocchi, F.: Seismogeochemical algorithms for  
540 earthquake prediction: a review, Ann. Geophys-Italy, 40(6), 1483–1492,  
541 <http://hdl.handle.net/2122/1524>, 1997.

542 Federico C., Pizzino, L., Cinti, D., De Gregorio, S., Favara, R., Galli, G., Giudice, G.,  
543 Guerrieri, S., Quattrocchi, F. and Voltattorni, N.: Inverse and forward modeling of  
544 groundwater circulation in a seismically active area (Monferrato, Piedmont, NW Italy):  
545 insights into stress-induced variations in water chemistry, Chem. Geol., 248, 14–39,  
546 <http://dx.doi.org/10.1016/j.chemgeo.2007.10.007>, 2008.

547 Freund, F. T.: Pre-earthquake signals: Underlying physical processes. J. Asian Earth Sci.,  
548 41, 383–400, <https://doi.org/10.1016/j.jseaes.2010.03.009>, 2011.

549 Freund, F.T.: Earthquake probabilities and pre-earthquake signals, Current Science, 94,  
550 311-313, <https://www.jstor.org/stable/24100338>, 2008.



551 Freund, F.T., Takeuchi, A., Lau, B.W.S.: Electric currents streaming out of stressed  
552 igneous rocks – A step towards understanding pre-earthquake low frequency EM  
553 emissions, *Phys. Chem. Earth*, 31, 389-396, <https://doi.org/10.1016/j.pce.2006.02.027>,  
554 2006.

555 Gori, F. and Barberio, M.D.: Hydrogeochemical changes before and during the 2019  
556 Benevento seismic swarm in central-southern Italy, *J. Hydrol.*, 604,  
557 <https://doi.org/10.1016/j.jhydrol.2021.127250>, 2022.

558 Grant, R. A., Halliday, T., Balderer, W. P., Leuenberger, F., Newcomer, M., Cyr, G. and  
559 Freund, F. T.: Groundwater chemistry changes before major earthquakes and possible  
560 effects on animals, *Int. J. Environ. Res. PU*, 1936–1956,  
561 <https://doi.org/10.3390%2Fijerph8061936>, 2011.

562 Geller, R. J., Jackson, D. D., Kagan, Y.Y., Mulargia, F.: Earthquake cannot be  
563 predicted, *Science*, 275, 1616–1617, <https://doi.org/10.1126/science.275.5306.1616>,  
564 1997.

565 Hancock, P. L. and Barka, A. A.: Kinematic indicators on active normal faults in western  
566 Turkey. *J. Struct Geol.*, 9, 415-430, [https://doi.org/10.1016/0191-8141%2887%2990142-  
567 8](https://doi.org/10.1016/0191-8141%2887%2990142-8), 1987.

568 Hartmann, J. and Levy, J. K.: The influence of seismotectonic on precursory changes in  
569 groundwater composition for the 1995 Kobe earthquake, Japan. *Hydrology Journal*, 14,  
570 1307–1318, <https://doi.org/10.1007/s10040-006-0030-7>, 2006.

571 Hempton, M.R.: The North Anatolian fault and complexities of continental escape. *J. Struct*  
572 *Geol.*, 4, 502 – 504, [https://doi.org/10.1016/0191-8141\(82\)90041-4](https://doi.org/10.1016/0191-8141(82)90041-4), 1982.

573 Hauksson, E.: Radon content of groundwater as an earthquake precursor: Evaluation of  
574 worldwide data and physical basis, *J. Geophys. Res.* 86, B10, 9397-9410,  
575 <https://doi.org/10.1029/JB086iB10p09397>, 1981.

576 He, A. and Singh, R.P.: Groundwater level response to the Wenchuan earthquake of  
577 May 2008, *Geomatics, Nat. Haz. and Risk* 10, 336-352,  
578 <https://doi.org/10.1080/19475705.2018.1523236>, 2019.

579 İnan, S., Ergintav, S., Saatçılar, S., Tüzel, B. and İravul, Y.: Turkey makes major  
580 investments in earthquake research. *EOS Transactions* 88, 333–334,  
581 <https://doi.org/10.1029/2007EO340002>, 2007.

582 İnan, S., Akgül, T., Seyis, C., Saatçılar, R., Baykut, S., Ergintav, S. and Bas, M.:  
583 Geochemical monitoring in the Marmara Region (NW Turkey): A search for precursors of  
584 seismic activity, *J. Geophys, Res.* 113, B03401, <https://doi.org/10.1029/2007JB005206>,  
585 2008.

586 İnan, S., Ertekin, K., Seyis, C., Şimşek, S., Kulak, F., Dikbaş, A., Tan, O., Ergintav, S.,  
587 Çakmak, R., Yörük, A., Çergel, M., Yakan, H., Karakuş, H., Saatçılar, R., Akçiğ, Z., İravul,  
588 Y. and Tüzel, B. (2010) Multi-disciplinary earthquake researches in Western Turkey: Hints  
589 to select sites to study geochemical transients associated to seismicity. *Acta Geophys.*,  
590 58, 767–813, <https://doi.org/10.2478/s11600-010-0016-7>, 2010.

591 İnan, S., Pabuçcu, Z., Kulak, F., Ergintav, S., Tatar, O., Altunel, E., Akyüz, S., Tan, O.,  
592 Seyis, C., Çakmak, R., Saatçılar, R. and Eyidogan, H.: Microplate boundaries hindering  
593 pre-earthquake strain transfer (Western Turkey): inferences from continuous  
594 geochemical monitoring, *J. Asian Earth Sci.*, 48, 56-71,  
595 <http://dx.doi.org/10.1016/j.jseaes.2011.12.016>, 2012a.

596 İnan, S., Kop, A., Çetin, H., Kulak, F., Pabuçcu, Z., Seyis, C., Ergintav, S., Tan, O.,  
597 Saatçılar, S. and Bodur, M. N.: Seasonal variations in soil radon emanation: Long term  
598 continuous monitoring in light of seismicity, *Nat. Hazards*, 62, 575-591,  
599 <https://doi.org/10.1007/s11069-012-0096-6>, 2012b.

600 İnan, S., Balderer, W.P., Leuenberger-West, F., Yakan, H., Özvan, A., Freund, F.T.:  
601 Springwater chemical anomalies prior to the Mw = 7.2 Van Earthquake  
602 (Turkey). *Geochem J.*, 46, e11-e16, <https://doi.org/10.2343/geochemj.1.0159>, 2012c.

603

604 Ingebritsen, S.E., Manga, M.: Earthquakes: hydrogeochemical precursors. *Nat. Geosci.*,  
605 7, 697–698. <https://doi.org/10.1038/ngeo2261>, 2014.

606 Italiano, F., Martinelli, G. and Rizzo, A.: Geochemical evidence of seismogenic-induced  
607 anomalies in the dissolved gases of thermal waters: A case study of Umbria (Central  
608 Apennines, Italy) both during and after the 1997–1998 seismic swarm, *Geochem.*  
609 *Geophys. Geosy.*, 5, Q11001, <https://doi.org/10.1029/2004GC000720>, 2004.

610 Jackson, J. and McKenzie, D.P.: Active tectonics of the Alpine–Himalayan Belt between  
611 western Turkey and Pakistan, *Geophys. J. Roy. Astr. Soc.*, 77, 185–264,  
612 <https://doi.org/10.1111/j.1365-246X.1984.tb01931.x>, 1984.

613 Karig, D.E. and Kozlu, H.: Late Palaeogene – Neogene evolution of the triple junction  
614 region near Maras, south-central Turkey, *J. Geol. Soc. London*, 147, 1023–1034,  
615 <https://doi.org/10.1144/gsjgs.147.6.1023>, 1990.

616 Kelling, G., Gökçen, S.L., Floyd, P.A. and Gökçen, N.: Neogene tectonics and plate  
617 convergence in the Eastern Mediterranean: new data from southern Turkey, *Geology*, 15,  
618 425–429, [https://doi.org/10.1130/0091-7613\(1987\)15%3C425:NTAPCI%3E2.0.CO;2](https://doi.org/10.1130/0091-7613(1987)15%3C425:NTAPCI%3E2.0.CO;2)  
619 1987.

620 Kempler, D. and Garfunkel, Z.: Northeast Mediterranean triple junction from a plate  
621 kinematics point of view, *Bulletin of the Technical University of Istanbul, Special Issue 44*,  
622 425–454, 1991.



- 623 Ketin, I.: Über die tektonisch-mechanischen Folgerungen aus den grossen anatolischen  
624 Erdbeben des letzten Dezenniums, Geol. Rundsch, 36, 77–83,  
625 <https://doi.org/10.1007/BF01791916>, 1948.
- 626 King, J. Y., Koizumi, Y. and Kitagawa, Y.: Hydrogeochemical anomalies and the 1995  
627 Kobe Earthquake, Science, 269, 38–39, <https://doi.org/10.1126/science.269.5220.38>,  
628 1995.
- 629 Lovelock, P.E.R.: A review of the tectonics of the northern Middle East region. Geol. Mag.,  
630 121, 577–587, Online ISSN: 1469-5081, 1984.
- 631 Martinelli, G. and Ferrari, G.: Earthquake forerunners in a selected area of Northern  
632 Italy: recent developments in automatic geochemical monitoring. Tectonophysics 193,  
633 397-410. [https://doi.org/10.1016/0040-1951\(91\)90348-V](https://doi.org/10.1016/0040-1951(91)90348-V), 1991.
- 634 McKenzie, D.P.: Active tectonics of the Mediterranean Region, Geophys. J. Int., 30, 109–  
635 185, <https://doi.org/10.1111/j.1365-246X.1972.tb02351.x>, 1972.
- 636 McKenzie, D.P.: The East Anatolian fault: a major structure in eastern Turkey. Earth  
637 Planet Sc. Lett., 29, 189–193, [https://doi.org/10.1016/0012-821X\(76\)90038-8](https://doi.org/10.1016/0012-821X(76)90038-8), 1976.
- 638 Muehlberger, W.B. and Gordon, M.B.: Observations on the complexity of the East  
639 Anatolian fault, Turkey. J. Struct Geol., 9, 899–903, [http://dx.doi.org/10.1016/0191-8141\(87\)90091-5](http://dx.doi.org/10.1016/0191-8141(87)90091-5), 1987.
- 641 Nur, A.: Matsushiro, Japan, earthquake swarm: Confirmation of the dilatancy-fluid  
642 diffusion model, Geology, 2, 217–221, [https://doi.org/10.1130/0091-7613\(1974\)2%3C217:MJESCO%3E2.0.CO;2](https://doi.org/10.1130/0091-7613(1974)2%3C217:MJESCO%3E2.0.CO;2), 1974.
- 644 Ouzounov, D., Pulinets, S., Davidenko, D., Rozhnoi, A., Solovieva, M., Fedun, V.,  
645 Dwivedi, B. N., Rybin, A., Kafatos, M., and Taylor, P.: Transient effects in atmosphere  
646 and ionosphere preceding the 2015 M7.8 and M7.3 Gorkha-Nepal earthquakes, Front.  
647 Earth Sci., 9, <https://doi.org/10.3389/feart.2021.757358>, 2021.
- 648 Papadopoulos, G. A., Latoussakis, I., Daskalaki, E., Diakogianni, G., Fokaefs, A., Kolligri,  
649 M., Liadopoulou, K., Orfanogiannaki, K., and Pirentis, A.: The East Aegean Sea strong  
650 earthquake sequence of October–November 2005: lessons learned for earthquake  
651 prediction from foreshocks, Nat. Hazards Earth Syst. Sci., 6, 895–901,  
652 <https://doi.org/10.5194/nhess-6-895-2006>, 2006.
- 653 Paudel, S.R., Banjara, S.P., Wagle, A., Freund, F.T.: Earthquake chemical precursors in  
654 groundwater: a review, J. Seismol., 22, 1293–1314, <https://doi.org/10.1007/s10950-018-9739-8>, 2018.
- 656 Pérez, N. M., Hernández, P. A., Igarashi, G., Trujillo, I., Nakai, S., Sumino, H. and Wakita,  
657 H.: Searching and detecting earthquake geochemical precursors in CO<sub>2</sub>-rich

658 groundwaters from Galicia, Spain, *Geochem J.*, 42, 75–83,  
659 <http://dx.doi.org/10.2343/geochemj.42.75> , 2008.

660 Perinçek, D. and Çemen, I.: The structural relationship between the East Anatolian and  
661 Dead Sea fault zones in southeastern Turkey, *Tectonophysics*, 172, 331–340,  
662 [http://dx.doi.org/10.1016/0040-1951\(90\)90039-B](http://dx.doi.org/10.1016/0040-1951(90)90039-B), 1990.

663 Rapti, D., Martinelli, G., Zheng, G., Vincenzi, C.: Bottled Mineral Waters as  
664 Unconventional Sampling in Hydro-Geological Research. *Water* 15, 3466.  
665 <https://doi.org/10.3390/w15193466>. 2023

666 Rikitake, T.: Earthquake Precursors in Japan: Precursor Time and Detectability,  
667 *Tectonophysics*, 136, 265–282, [https://doi.org/10.1016/0040-1951\(87\)90029-1](https://doi.org/10.1016/0040-1951(87)90029-1) , 1987.

668 Rikitake, T.: Classification of earthquake precursors, *Tectonophysics*, 54, 293-309,  
669 [https://doi.org/10.1016/0040-1951\(79\)90372-X](https://doi.org/10.1016/0040-1951(79)90372-X), 1979.

670 Roeloffs, E.: Poroelastic techniques in the study of earthquake-related hydrologic  
671 phenomena, *Adv. Geophys.*, 37, 135–195, [https://doi.org/10.1016/S0065-](https://doi.org/10.1016/S0065-2687%2808%2960270-8)  
672 [2687%2808%2960270-8](https://doi.org/10.1016/S0065-2687%2808%2960270-8), 1996.

673 Rotstein, Y.: Counterclockwise rotation of the Anatolian block, *Tectonophysics*, 108, 71–  
674 91, [https://doi.org/10.1016/0040-1951\(84\)90155-0](https://doi.org/10.1016/0040-1951(84)90155-0), 1984.

675 Şaroğlu, F., Emre, O., Kuscu, I.: Active Fault map of Turkey (1:2 000 000 scale), General  
676 Directorate of Mineral Research and Exploration (MTA), Ankara, Turkey, 1992a

677 Şaroğlu, F., Emre, O., Kuscu, I.: The East Anatolian fault zone of Turkey. *Annales*  
678 *Tectonicae: International Journal of Structural Geology and Tectonics*, 6, 99–125 (Special  
679 Issue-Supplement to Volume VI), 1992b.

680 Scholz, R., Sykes, L. R. and Aggarwal, Y. P.: Earthquake prediction: A physical basis,  
681 *Science*, 181, 803–810, <https://www.science.org/doi/10.1126/science.181.4102.803>,  
682 1973.

683 Sengör, A. M. C. and Yılmaz, Y.: Tethyan evolution of Turkey: A plate tectonic approach,  
684 *Tectonophysics*, 75, 181– 241, [http://dx.doi.org/10.1016/0040-1951\(81\)90275-4](http://dx.doi.org/10.1016/0040-1951(81)90275-4), 1981.

685 Sengör, A. M. C., Görür, N. and Şaroğlu, F.: Strike-slip faulting and related basin  
686 formation in zones of tectonic escape: Turkey as a case study, in: *Strike-slip Deformation,*  
687 *Basin Formation, and Sedimentation*, edited by: Biddle, K. T. and Christie-Blick, N., *Soc.*  
688 *Econ. Pa.*, 37, 227–264, 1985.

689 Seyis, C., İnan, S., Yalçın, M.N.: Major factors affecting soil radon emanation, Nat.  
690 Hazards, 114, 2139–2162, <http://link.springer.com/10.1007/s11069-022-05464-y>, 2022.  
691 .

692 Sibson, R. H.: Implications of fault-valve behavior for rupture nucleation and recurrence,  
693 Tectonophysics, 211, 283–293, [https://doi.org/10.1016/0040-1951\(92\)90065-E](https://doi.org/10.1016/0040-1951(92)90065-E), 1992.

694 Sibson, R.H., Moore, J.M.M., Rankin, A.H.: Seismic pumping—a hydrothermal fluid  
695 transport mechanism, J. Geol. Soc. London, 131, 653–659,  
696 <https://doi.org/10.1144/gsjgs.131.6.0653>, 1975.

697 Skelton, A., Liljedahl-Claesson, L., Wästeby, N., Andrén, M., Stockmann, G., Sturkell, E.,  
698 et al.: Hydrochemical changes before and after earthquakes based on long-term  
699 measurements of multiple parameters at two sites in northern Iceland—a review, J.  
700 Geophys. Res-Sol EA., 124, 2702–2720. <https://doi.org/10.1029/2018JB016757>, 2019.

701 Skelton, A., Andrén, M., Kristmannsdóttir, H., Stockmann, G., Mörth, C-M.,  
702 Sveinbjörnsdóttir, A., Jónsson, S., Sturkell, E., Guðrúnardóttir, H.R., Hjartarson, H.,  
703 Siegmund, H., Kockum, I.: Changes in groundwater chemistry before two consecutive  
704 earthquakes in Iceland. Nat. Geosci., 7, 752-756. <http://dx.doi.org/10.1038/NGEO2250>,  
705 2014.

706 Sol, S., Meltzer, A., Bürgmann, R., van der Hilst, R. D., King, R., Chen, Z., Koons, P. O.,  
707 Lev, E., Liu, Y. P., Zeitler, P. K., Zhang, X., Zhang, J. and Zurek, B.: Geodynamics of the  
708 southern Tibetan Plateau from seismic anisotropy and geodesy, Geology, 35, 563–566,  
709 <https://doi.org/10.1130/G23408A.1>, 2007.

710 Soysal, H., Sipahioğlu, S., Kolçak, D. and Altınok, Y.: Historical earthquake catalogue of  
711 Turkey and surrounding area (2100 B.C. – 1900 A.D.), The Scientific and Technological  
712 Research Council of Turkey Technical Report, TBAG-341, 1981.

713 Sugisaki, R., Ito, T., Nagamine, K. and Kawabe, I.: Gas geochemical changes at mineral  
714 springs associated with the 1995 southern Hyogo earthquake (M = 7.2), Japan, Earth  
715 Planet Sc. Lett., 139, 239–249, [https://doi.org/10.1016/0012-821X\(96\)00007-6](https://doi.org/10.1016/0012-821X(96)00007-6), 1996.

716 Sultankhodhaev, G. A.: International symposium on earthquake prediction, UNESCO,  
717 Paris 1979, 181-191, 1984.

718 Tansi, C., Tallarico, A., Iovine, G., Folino Gallo, M. and Falcone, G.: Interpretation of  
719 radon anomalies in seismotectonic and tectonic-gravitational settings: the southeastern  
720 Crati graben (Northern Calabria, Italy), Tectonophysics, 396, 181–193,  
721 <https://doi.org/10.1016/j.tecto.2004.11.008>, 2005.

722 Thomas, D.M., Cuff, K.E., Cox, M.E.: The association between ground gas radon  
723 variations and geologic activity in Hawaii, J. Geophys. Res-Sol EA, 91, 12186-12198,  
724 [https://ui.adsabs.harvard.edu/link\\_gateway/1986JGR....9112186T/doi:10.1029/JB091iB](https://ui.adsabs.harvard.edu/link_gateway/1986JGR....9112186T/doi:10.1029/JB091iB12p12186)  
725 [12p12186](https://ui.adsabs.harvard.edu/link_gateway/1986JGR....9112186T/doi:10.1029/JB091iB12p12186). 1986.

- 726 Toutain, J. P., Munoz, M., Poitrasson, F. and Lienard, F.: Springwater chloride ion  
727 anomaly prior to a ML = 5.2 Pyrenean earthquake, *Earth Planet Sc. Lett.*, 149, 113–119.  
728 [https://doi.org/10.1016/S0012-821X\(97\)00066-6](https://doi.org/10.1016/S0012-821X(97)00066-6), 1997.
- 729 Tsunogai, U. and Wakita, H.: Precursory chemical changes in groundwater: Kobe  
730 earthquake, Japan, *Science*, 269, 61-63, <https://doi.org/10.1126/science.269.5220.61>,  
731 1995.
- 732 Turcotte, W. L.: Earthquake prediction, *Annu. Rev. Earth Pl. Sc.*, 19, 263 – 281,  
733 <https://doi.org/10.1146/annurev.ea.19.050191.001403>, 1991.
- 734 Usta, D., Ateş, Ş., Beyazpınar, M., Kanar, F., Yıldız, H., Uçar, L., İsmail Akça, İ., Tufan,  
735 E. and Örtlek, A. T.: New data on the stratigraphy of the central and northern Amonous  
736 mountains (Osmaniye - Gaziantep - K. Maraş). *Bulletin of the Turkish Association of*  
737 *Petroleum Geologists*, 27, 57-98, 2015.
- 738 Usta, D., Ateş, Ş., Kanar, F., Beyazpınar, M., Uçar, L., Yıldız, H., Tufan, E., Akça, İ.,  
739 Örtlek, A. T.: Doğu Toroslar'ın jeolojisi ve jeodinamik evrimi projesi (K.Maras, Osmaniye,  
740 Gaziantep, Adana, Hatay). General Directorate of Minerals and Exploration of Turkey  
741 (MTA) unpublished Report No 13568, 494 pages, Ankara (in Turkish), 2017.
- 742 Uyeda, S., Nagao, T. and Kamogawa, M.: Short-term earthquake prediction: Current  
743 status of seismo-electromagnetics, *Tectonophysics*, 470, 205–213.  
744 <https://doi.org/10.1016/j.tecto.2008.07.019>, 2008.
- 745 Wakita, H.: Geochemical challenge to earthquake prediction, *P. Natl. Acad. Sci. USA*, 93,  
746 9, 3781-3786, DOI: 10.1073/pnas.93.9.3781, 1996.
- 747 Wakita, H., Nakamura, Y. and Sano, Y.: Short-term and intermediate-term geochemical  
748 precursors, *Pure and Applied Geophysics*, 125, 267–278,  
749 <https://doi.org/10.1007/BF00878999>, 1988.
- 750 Walia, V., Yang, T.F., Hong, W.L., Lin, S.J., Fu, C.C., Wen, K.L., Chen, C.H.:  
751 Geochemical variation of soil–gas composition for fault trace and earthquake precursory  
752 studies along the Hsincheng fault in NW Taiwan, *Applied Radiation and Isotopes* 67,  
753 1855-1863, <https://doi.org/10.1016/j.apradiso.2009.07.004>. 2009.
- 754 Wang, C-Y. and Manga, M.: *Water and Earthquakes. Lecture Notes in Earth System*  
755 *Sciences*. Springer, 307 pp. <https://doi.org/10.1007/978-3-030-64308-9>. 2021.
- 756 Westaway, R. and Arger, J.: The Gölbaşı basin, southeastern Turkey: a complex  
757 discontinuity in a major strike-slip fault zone, *J. Geol. Soc. London*, 153, 729 – 744,  
758 <https://doi.org/10.1144/gsjgs.153.5.0729>, 1996.

759 Xiang, Y. and Peng, S.: Hydrochemical and stable isotopes ( $\delta^2\text{H}$  and  $\delta^{18}\text{O}$ ) changes  
760 of groundwater from a spring induced by local earthquakes, Northwest China. *Frontiers*  
761 in Earth Sciences, 09 January 2023. *Solid Earth Geophysics*.  
762 <https://doi.org/10.3389/feart.2022.1100068>, 2023.

763 Vallianatos, F., Triantis, D., Tzanis, A., Anastasiadis, C., Stavrakas, I.: Electric earthquake  
764 precursors: from laboratory results to field observations. *Physics and Chemistry of the*  
765 *Earth Parts A/B/C* 29, 339-351, <https://doi.org/10.1016/j.pce.2003.12.003>, 2004.

766 Vallianatos, F. and Tzanis, A.: Electric current generation associated with the deformation  
767 rate of a solid: Preseismic and coseismic signals. *Physics and Chemistry of the Earth*  
768 *Parts A/B/C* 23, 933-938, [https://doi.org/10.1016/S0079-1946\(98\)00122-0](https://doi.org/10.1016/S0079-1946(98)00122-0), 1998.

769 Virk, H.S., and Singh, B.: Radon anomalies in soil gas and groundwater as earthquake  
770 precursor phenomena, *Tectonophysics*, 227, 215-224, [https://doi.org/10.1016/0040-](https://doi.org/10.1016/0040-1951(93)90096-3)  
771 [1951\(93\)90096-3](https://doi.org/10.1016/0040-1951(93)90096-3), 1993.

772 Yönlü, Ö., Altunel, E. and Karabacak, V.: Geological and geomorphological evidence for  
773 the southwestern extension of the East Anatolian Fault Zone, Turkey. *Earth Planet Sc.*  
774 *Lett.*, 469, 1–14, <http://dx.doi.org/10.1016/j.epsl.2017.03.034>, 2017.

775 Yu, H., Liu, L., Ma, Y., Yan, R., Liu, J., Ma, Y., Li, Z., Zhang, X., Zhao, J., Yu, C.: Observed  
776 hydrological changes associated with active tectonic blocks before three consecutive  
777 earthquakes in Qinghai, China *Scientific Reports* 13, 8988.  
778 <https://doi.org/10.1038/s41598-023-36274-2>, 2023.

779 Zeyrek, M., Ertekin, K., Kaçmaz, S., Seyis, C., İnan, S.: An ion chromatography method  
780 for the determination of major anions in geothermal water samples, *Geostand. Geoanal.*  
781 *Res.*, 34, 67-77, <http://dx.doi.org/10.1111/j.1751-908X.2009.00020.x>, 2010.

782
