# Supplementary material for: Spring water anomalies before two consecutive earthquakes (Mw 7.7 and Mw 7.6) in Kahramanmaraş (Türkiye) on 6 February 2023
Source: Copernicus journal article supplement (doi:10.5194/nhess-2023-133), 2023-08-01
Supplement: Supplementary file [file nhess-2023-133-CC2-supplement.pdf]

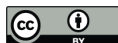

1 **Spring water anomalies before two consecutive earthquakes (Mw 7.7 and Mw 7.6)**  
2 **in Kahramanmaraş (Türkiye) on 6 February 2023**

3

4 Sedat İnan<sup>1,\*</sup>, Hasan Çetin<sup>2</sup>, Nurettin Yakupoğlu<sup>1</sup>

5

6 <sup>1</sup>Department of Geological Engineering, Istanbul Technical University, Ayazağa,  
7 Istanbul, Türkiye, 34467

8 <sup>2</sup>Department of Geology, Çukurova University, Adana, Türkiye, 01330

9 \*Corresponding Author: sedatinan@itu.edu.tr

10 **ABSTRACT**

11 Understanding earthquake phenomena is always challenging. Search for reliable  
12 precursors of earthquakes are important but requires systematic and long-time monitoring  
13 employing multi-disciplinary techniques. In search of possible precursors, we obtained  
14 commercially bottled spring waters dated before and after the earthquakes of 6 February  
15 2023. Hydrogeochemical precursors have been detected in commercially bottled natural  
16 spring waters (Ayran Spring and Bahçepınar Spring) which are at a distance of about 100  
17 km and 175 km from the epicenters of the Mw 7.7 and Mw 7.6 Kahramanmaraş (Türkiye)  
18 Earthquakes of 6 February 2023, respectively. The available water samples cover the  
19 period from March 2022 to March 2023. The pre-earthquake anomaly is characterized by  
20 an increase in electrical conductivity and major ions ( $\text{Ca}^{2+}$ ,  $\text{Mg}^{2+}$ ,  $\text{K}^+$ ,  $\text{Na}^+$ ,  $\text{Cl}^-$ , and  $\text{SO}_4^{2-}$   
21 ) compared to the background for Ayran Spring water samples. The pre-earthquake  
22 anomaly lasted for at least six months. The anomaly in major ions sharply declined and  
23 the ion content approached the background values about two weeks after the  
24 earthquakes. Although only 6.5 kilometers away from the Ayran Spring, the bottled water  
25 samples of the Bahçepınar Spring did not show any anomalies in electrical conductivity;  
26 therefore, the samples were not analyzed for ion content. Bahçepınar water is collected  
27 from shallow boreholes dug into alluvial deposits which we believe are decoupled from  
28 the basement rocks and this may be the reason for the lack of abnormal water chemistry  
29 prior to the earthquakes. This attests to the fact that sampling locations are very important  
30 in the detection of possible earthquake precursors. Results on the Ayran spring water  
31 samples indicate that spring water chemical anomalies of discrete samples may provide



32 valuable information on pre-earthquake crustal deformation. Monitoring of spring waters,  
33 along with other monitoring techniques in a multidisciplinary network, and for a sufficiently  
34 long time, could potentially enable obtaining reliable proxy indicators of pre-earthquake  
35 **crustal deformation.**

36

37 **Keywords:** geochemical anomalies, spring water, earthquake precursors,  
38 Kahramanmaraş earthquakes, East Anatolian Fault Zone (EAFZ), Türkiye

39

## 40 1. Introduction

41 Two devastating earthquakes (Mw 7.7 and Mw 7.6) struck the Kahramanmaraş area in  
42 Southern Turkey on 6 February 2023; the earthquakes occurred about 9 hours apart. The  
43 earthquakes caused devastation **claiming more than 50,000 deaths**; leaving behind  
44 thousands injured and/or homeless. Earthquakes of destructive magnitudes (e.g., M>7)  
45 are naturally expected to occur at plate boundary settings (Figure 1) and Kahramanmaras  
46 province is at the junction of the East Anatolian Fault System (EAFS) and the Dead Sea  
47 Fault System (DAFS). However, the reason why such natural events turn into disasters  
48 is mainly due to a lack of preparedness. Where buildings are not built to be sufficiently  
49 earthquake-resistant, monitoring of crustal deformation and searching for reliable pre-  
50 earthquake signals become more important. This is obviously a big challenge for earth  
51 scientists to overcome. Although there is still a long way to go on this front, the scientific  
52 literature is full of scattered but promising and encouraging cases.

53 Earthquakes are complex natural phenomena and their predictions have been long  
54 viewed as difficult, if not impossible (e.g., Geller et al., 1997). Geochemical observations  
55 to identify earthquake precursors were initiated in the late 1960s (Rikitake, 1979; Wakita  
56 1996). Reviewing twenty years of relevant data Turcotte (1991) concluded that large  
57 earthquakes are not preceded by reliable seismic precursors. Moreover, Geller et al.  
58 (1997) claimed that earthquakes can never be predicted. However, for the last few  
59 decades, there have been numerous reports of **ground-based anomalies** preceding major  
60 earthquakes. (including but not limited to Rikitake, 1979; Dobrovolsky et al., 1979;  
61 Birchard and Libby, 1978; Hauksson, 1981; Wakita et al., 1988; Sultankhodhaev, 1984;

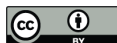

62 Thomas et al., 1986; Rikitake, 1987; Etiope et al., 1997; Bella et al., 1998; Virk and Singh,  
63 1993; King et al., 1995; Planinic et al., 2004; Claesson et al., 2004; Hartmann and Levy,  
64 2006; Papadopoulos et al., 2006; Uyeda et al., 2008; İnan et al., 2008; İnan et al., 2010;  
65 İnan et al., 2012a,b,c; Skelton et al., 2014 and 2019; Barberio et al., 2017; Ouzounov et  
66 al., 2021; Gori and Barberio, 2022; Xiang and Peng, 2023). Compiling a review of claimed  
67 precursors, Cicerone et al. (2009) conducted a survey of published scientific literature on  
68 earthquake precursors and concluded that precursory anomalies seem to be recorded  
69 where there is modern instrumentation. İnan et al. (2010 and 2012a) provided hints to  
70 select monitoring sites. Recently, Conti et al. (2021) have provided a short review of  
71 ground-based observations before earthquakes

72 **Hydro-geochemical anomalies observed nearby seismic events** are generally interpreted  
73 to be related to the alteration of the groundwater circulating system by the changes in the  
74 crustal stress/strain before earthquakes and mixing of different aquifers (e.g., Scholz et  
75 al., 1973; Nur, 1974; Sibson et al., 1975; Sugisaki et al., 1996; Tsunogai and Wakita,  
76 1995; Toutain et al., 1997; Claesson et al., 2004; Pérez et al., 2008; İnan et al., 2010;  
77 Grant et al., 2011; İnan et al., 2012c; Doglioni et al., 2014; Ingebritsen and Manga, 2014;  
78 Skelton et al., 2014 and 2019; Barberio et al., 2017; Gori and Barberio, 2022; Xiang and  
79 Peng, 2023). However, another different approach based on “stress-activated positive  
80 hole currents” has been suggested to play a role in the development of physicochemical  
81 pre-earthquake stress indicators (Freund, 2011; Paudel et al., 2018)

82 As suggested by Nur (1974) and later by Rikitake (1987) precursory phenomena may  
83 have a common physical basis which Scholz et al. (1973) called the “Dilatation and water  
84 diffusion (DWD) model”. Roeloffs (1996) noted that with respect to earthquake hydrology,  
85 mechanical and fluid-dynamic effects can be modeled using poroelasticity. More recently,  
86 the DWD model has been explained further (e.g., Doglioni et al., 2014; Wang and Manga,  
87 2021). However, other authors have proposed a fundamentally different approach  
88 (Freund et al., 2006; Freund, 2008; Freund, 2011; Paudel et al., 2018) to study and  
89 evaluate physicochemical pre-earthquake stress indicators. Until the mechanism  
90 controlling pre-earthquake processes is fully understood, it is worth noting that the  
91 success of any pre-earthquake stress indicators may be compromised by the ever-  
92 present crustal heterogeneity, anisotropy, and/or crustal blocks (Areshidze et al., 1992;



93 Tansi et al., 2005; Sol et al., 2007; İnan et al., 2012a; Yu et al., 2023). Microplate and/or  
94 block boundaries are obstacles to pre-earthquake strain to transfer from one block to the  
95 other (İnan et al., 2012a; Yu et al., 2023).

96

97 A multi-disciplinary earthquake observation network (GPS, seismology, soil radon, and  
98 spring water monitoring stations) was established in Kahramanmaraş and surrounding  
99 provinces along the fault zones (Adana, Hatay, Malatya, Elazığ, Bingöl) in 2007 under the  
100 scope of the TURDEP Project (İnan et al. 2007). In the Kahramanmaraş area, due to its  
101 quiescence, also borehole tilt monitoring stations were established. Continuous  
102 monitoring was continued until the middle of 2012 and valuable multi-disciplinary data  
103 were collected. However, throughout these five years, no earthquake of significant  
104 magnitude (e.g.  $M > 6$ ) occurred to test the usefulness of the monitoring network, the  
105 project was terminated by the funding organization due mainly to a lack of vision. As a  
106 result, the earth science community was caught unprepared when two consecutive  
107 devastating earthquakes struck the area on 6 February 2023. No ground (except GPS  
108 and seismology) monitoring station data were available to detect possible pre-earthquake  
109 anomalies. However, following the Mw 7.7 and Mw 7.6 Kahramanmaraş earthquakes, we  
110 searched for bottled spring waters to analyze in search of possible pre-earthquake  
111 anomalies. This proved difficult as the water supply to the large community affected by  
112 the earthquakes was quite limited and businesses providing bottled spring waters were  
113 also mostly shut down. Finally, we were able to obtain commercially bottled water  
114 samples (dated before and after the earthquake) from the Ayran and Bahçepinar springs  
115 which are located within about a 6.5-kilometer distance in the Osmaniye Province. The  
116 spring waters are about 100 kilometers and 175 kilometers from the epicenter of the first  
117 (Mw 7.7) and the second (Mw 7.6) earthquakes, respectively (Figure 1B). In this study,  
118 we conducted electrical conductivity (Ec) measurements on bottled waters, and based on  
119 the Ec results, we selected samples for analysis of major ions in water in search of pre-  
120 earthquake anomalies. The spring water samples cover the range from March 2022 to  
121 March 2023.

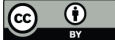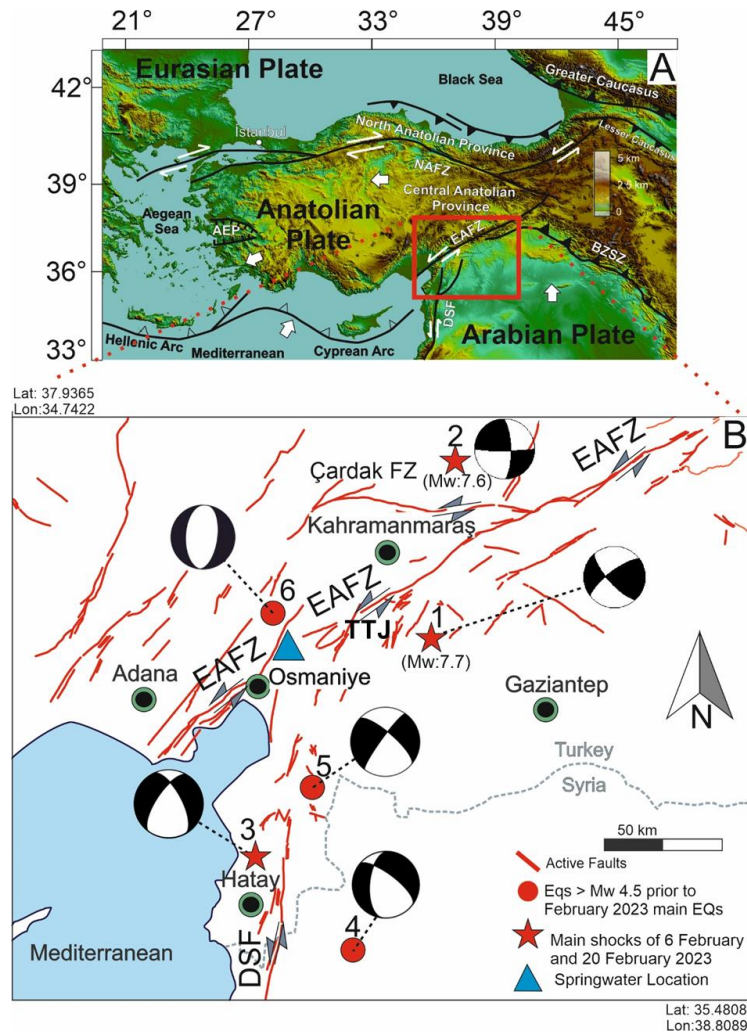

122

123 **Figure 1. A)** Neotectonics map of the Türkiye and surroundings (compiled from Sengör  
124 and Yılmaz, 1981; Sengör et al., 1985; Hancock and Barka, 1987; Şaroğlu et al., 1992;  
125 Barka and Reilinger, 1997; Bozkurt, 2001). **B)** Active fault map of the region affected by  
126 the February 2023 Earthquakes (Perinçek and Çemen, 1990; Şaroğlu et al., 1992a; Cetin  
127 et al., 2003). Red stars show the epicenters of the Mw 7.7 and 7.6 Kahramanmaraş  
128 Earthquakes of 6 February 2023, and Mw 6.4 Hatay Earthquake of 20 February 2023.  
129 Filled red circles show the locations of the earthquakes (Mw>4.5) that occurred in the  
130 area (circle area with a radius of 150 km from the location of the water spring) between  
131 September 2022 and 5 February 2023. Details of the earthquakes are given in Table 1.  
132 TTJ is Türkoğlu Triple Junction. Beach balls are fault plane solutions of earthquakes and  
133 were obtained from the Bogazici University Kandilli Observatory and Earthquake  
134 Research Institute (KOERI) of Turkey; [www.koeri.edu.tr](http://www.koeri.edu.tr)



## 135 2. Active tectonics of the Kahramanmaraş region

136 Kahramanmaraş region takes place in the suture zone formed by the collision between  
137 Arabian and Anatolian plates (Figure 1A). After this collision, very important strike-slip  
138 fault zones were developed in the Anatolian plate due to the continuous northward  
139 movement of the Arabian plate and the resulting westward movement or escape of the  
140 Anatolian plate along two major fault zones, the North Anatolian Fault Zone (NAFZ) and  
141 the East Anatolian Fault Zone (EAFZ) (Ketin, 1948; McKenzie, 1972; Dewey and Şengör,  
142 1979; Şengör and Yılmaz, 1981; Hempton, 1982; Şengör et al., 1985).

143 The East Anatolian Fault Zone (EAFZ) is approximately 550 km long, northeast-  
144 southwest trending, sinistral strike-slip fault (Figure 1A). It was first described by Allen  
145 (1969) and mapped by Arpat and Şaroğlu (1972). The EAFZ starts from Karlıova Triple  
146 Junction in the northeast, and it runs in the southwest direction, passes near the east-  
147 southeast of Kahramanmaraş, and joins another triple junction at Türkoğlu (TTJ in Figure  
148 1B). The EAFZ then continues to the Hatay in the south direction to merge into the Dead  
149 Sea Fault Zone (DSFZ) (Allen, 1969; Arpat and Şaroğlu, 1972; Dewey and Sengör, 1979;  
150 Rotstein, 1984; Şengör et al., 1985; Kelling et al., 1987; Şaroğlu et al., 1992a and 1992b;  
151 Cetin et al., 2003; Yönlü et al., 2017). There are different interpretations, however, for the  
152 remainder of the fault zone after Türkoğlu Triple Junction (marked as TTJ in Figure 1B).  
153 Some studies extend the fault zone southwesterly to the Mediterranean Sea (McKenzie,  
154 1972; Dewey et al., 1973; Jackson and McKenzie, 1984; Barka and Kadinsky-Cade,  
155 1988; Karig and Kozlu, 1990; Kempler and Garfunkel, 1991; Westaway and Arger, 1996),  
156 joining it with the Cyprian Arc along which the convergence is taking place between the  
157 African and Anatolian plates (McKenzie, 1976; Dewey and Şengör, 1979). Others think  
158 that the fault zone ends around the TTJ (Lovelock, 1984; Chorowicz et al., 1994).  
159 According to Muehlberger and Gordon (1987), the EAFZ becomes the northern branch  
160 of the DSFZ

161 The seismicity of the study area is controlled by a complex interaction of the African,  
162 Arabian, and Eurasian plates (McKenzie, 1972). The seismicity of the EAFZ has been  
163 minimal for most of the last 100 years (Ambraseys, 1989). Historical earthquake records



164 show that Kahramanmaraş and its surroundings were affected by **the** two major  
165 earthquakes in AD 1114 and AD 1513 (Soysal et al., 1981; Ambraseys, 1989). There had  
166 been a long quiescence of more than 500 years in the Kahramanmaraş area before the  
167 Mw 7.7 and Mw 7.6 earthquakes struck on 6 February 2023. About one year before these  
168 earthquakes occurred, the area had been seismically quiet as suggested by only a few  
169  $M > 4.5$  earthquakes occurring in a circular area with a radius of 150 km; taking the Ayran  
170 spring water as the center (Figure 1B and Table 1). The fault plane solutions (FPS) for  
171 earthquakes #3, #4, and #5 suggest mainly normal faulting, whereas, for others  
172 (earthquakes #1, #2, and #6), FPS suggest movement on dominantly left lateral strike-  
173 slip faults (Figure 1B) as expected for left-lateral strike-slip nature of the EAFZ.

174 **Table 1.** Earthquakes' time, magnitude, and locations as received from [www.koeri.edu.tr](http://www.koeri.edu.tr).  
175 Earthquakes #1, #2, and #3 are the earthquakes of February 2023. Earthquakes #4, #5,  
176 and #6 are those that have occurred in the circular area (with a radius of 150 km from the  
177 Ayran spring water location) between September 1<sup>st</sup>, 2022 and 5 February 2023. The  
178 locations of these earthquakes are given on the map (Figure 1B).

| Earthquake # | Magnitude (Mw) | Date       | Time (GMT) | Latitude | longitude |
|--------------|----------------|------------|------------|----------|-----------|
| 1            | 7.7            | 06.02.2023 | 01:17      | 37.1757  | 37.0850   |
| 2            | 7.6            | 06.02.2023 | 10:24      | 38.0818  | 37.1773   |
| 3            | 6.4            | 20.02.2023 | 17:04      | 36.0713  | 36.1012   |
| 4            | 4.6            | 12.01.2023 | 20:40      | 35.5712  | 36.6723   |
| 5            | 4.9            | 18.12.2022 | 18:13      | 36.3978  | 36.4455   |
| 6            | 5.0            | 11.10.2022 | 15:48      | 37.3025  | 36.2403   |

179

### 180 3. Samples and methods

181

#### 182 3.1. Spring water samples

183 The spring water samples were received in commercial polyethylene bottles and brought  
184 to Istanbul Technical University Laboratory for electrical conductivity measurements and  
185 major ion analyses. Some of the samples had been bottled up to several months before  
186 the analyses. However, this does not create any concern because much longer storage  
187 in this kind of bottle has been reported to be appropriate in terms of keeping reliable  
188 concentrations (Tsunogai and Wakita, 1995; İnan et al., 2012c).



189 The spring water samples cover the range from March 2022 to March 2023. It is worth  
190 noting that the oldest sample predating the earthquakes was AYR 1 (dated 8 March 2022)  
191 from the Ayran Spring. Other bottled water samples we could obtain from both springs  
192 were dated between September 2022 and March 2023. In fact, we could not obtain any  
193 samples dated between 8 March and 14 September 2022. The samples from September,  
194 October, and November 2022 are limited but from December 2022 to January 2023,  
195 available samples are several per month (Table 2).

### 196 **3.2. Spring water analysis**

197 We first screened the bottled water samples by conducting electrical conductivity (Ec)  
198 measurements, and based on the results, we selected samples for analysis of major ions.  
199 Samples of the AYR spring water were analyzed by ion chromatography as discussed by  
200 Zeyrek et al. (2010). Briefly, the samples were filtered at 0.45  $\mu\text{m}$  and split into two  
201 portions before analysis using an ion chromatography instrument (Dionex ICS 1000).  
202 Sodium carbonate and methane-sulfonic acid were used as eluents for anion and cation  
203 analyses, respectively. For calibration, DIONEX Certified Reference Standards were  
204 used. Deionized water with a resistance better than 18.2 Megaohm was used for the  
205 preparation of all eluents. Repeated measurements ascertained that the analytical  
206 uncertainties for all anions and cations were below 5%. Electrical conductivity (Ec)  
207 measurements for the bottled Bahçepinar (BPN) spring water samples and both Ec and  
208 Ion analysis results for the bottled Ayran spring waters are listed in Table 2.

### 209 **3.3. Statistical analysis of the data**

210 For the statistical treatment of the data on major ion contents of the water samples, we  
211 calculated the weighted average (weighted compared to the analytical error for each  
212 point) and computed the  $2\sigma$  external error ( $2 \times \alpha_e$ ) from the following equation

213

$$\alpha_e = \frac{\sum_{i=1}^n (x_i - \bar{x})^2 / \sigma_i^2}{(n-1) \sum_{i=1}^n 1 / \sigma_i^2}$$

214



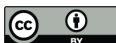

215 where  $x$  is the average and  $\sigma$  the analytical error on each measured point. The  $2\sigma$  external  
216 error ( $\alpha_e$ ) considers the general variability of all datasets and the analytical error on each  
217 point; thus, we obtained the total error envelope for the samples that we consider  
218 representing background (from 15 February to 31 March 2023; see Table 2 and Figure  
219 3B).

220

### 221 **3.4. Relation between earthquake magnitude, distance, and precursory duration**

222 Slightly different relations between earthquake magnitude, duration of a precursory  
223 anomaly, and the distance of the monitoring site to the earthquake epicenter have been  
224 proposed. Dobrovolsky et al. (1979) proposed a theoretical relation ( $D = 10^{0.43M}$ ) between  
225 earthquake magnitude and maximum epicentral distance at which geochemical  
226 anomalies may be observed. This relation assumes a homogenous and isotropic crust.  
227 Where  $M$  is the earthquake magnitude and  $D$  is the distance in kilometers to the  
228 earthquake epicenter. Rikitake (1987) noted a slightly different relation ( $\log T = a + b \cdot M$ ;  
229 where  $a$  and  $b$  are constants,  $T$  is the duration of anomaly and  $M$  is the magnitude of an  
230 earthquake). Moreover, Sultankhodhaev (1984) also reported a relation, between  
231 earthquake magnitude, the distance of the monitoring site to the earthquake epicenter,  
232 and duration of precursory anomaly ( $\log(DT) = 0.63 \cdot M - b$ ; where  $D$  is the distance in  
233 km,  $T$  is the duration of a precursory anomaly in days, and  $M$  is earthquake magnitude;  $b$   
234 is a constant taken as 0.15. All of **these three relations** provide a helpful initial idea about  
235 what to expect of precursory anomalies in terms of duration and distance to the  
236 earthquake epicenter. Inan et al. (2008 and 2010) verified Dobrovolsky et al.'s (1979)  
237 relation for medium-size earthquakes ( $M < 5.3$ ). Accordingly, for an earthquake of  
238 magnitude 4.5, the maximum distance for detection of possible geochemical anomalies  
239 in the Ayran Spring water will be about 100 km. For contingency, we took a 150 km radius  
240 and listed in Table 1 the earthquakes with  $M > 4.5$  occurring between September 2022  
241 and 5 February 2023 in order to compare with the water geochemical data we obtained  
242 in this study.

243



244

245

#### 4. Results and Discussion

246

247 The bottled water samples from the Bahcepinar (BPN) did not show any meaningful (e.g.,  
248 significant) variations in electrical conductivity (Ec) values; varying in a narrow range  
249 between 220 and 230 microsiemens/cm (Table 2). Therefore, these samples were not  
250 analyzed for major ions content because change (increase/decrease) of major ions  
251 contents is expected to result in Ec variation (İnan et al., 2010; İnan et al., 2012c).  
252 However, the bottled water samples from the Ayran (AYR) spring showed major variations  
253 in the Ec values; varying in range between 50 and 200 microsiemens/cm. Therefore, the  
254 AYR samples were analyzed for major ions. Possible reasons for not detecting any  
255 anomaly in the Ec measurements of the BNP spring water samples have been  
256 investigated. The investigation suggests that the reason may be the geological  
257 environment of the springs. The AYR spring water emanates from Middle-Upper  
258 Ordovician age metamorphic rocks (Kardere Formation) made up of quartzite,  
259 metasandstone, metasiltstone, and metashale (Usta et al., 2015 and 2017), whereas the  
260 BPN spring water is collected from shallow boreholes dug into valley-filling Quaternary  
261 age alluvial deposits that are underlain by ophiolite (Figure 2). The alluvial deposits reach  
262 a thickness of about two hundred meters and the water reservoir within the alluvium  
263 deposit is fed by precipitation and a nearby Bekdemir stream flowing towards the alluvial  
264 deposit. It is interesting that the streams disappear to the south; suggesting that the  
265 stream (creek) water is captured by the alluvial deposit. Since the BPN water is collected  
266 from shallow boreholes (less than 100 meters) dug into alluvial deposits, we believe that  
267 the alluvial deposits are decoupled from the basement rocks (which undergo pre-  
268 earthquake stress) and this may be the reason for the lack of anomaly in water chemistry  
269 prior to the earthquakes. This testifies to the importance of adequate geological  
270 knowledge of the area before sampling discrete geochemical samples (water or soil gas)  
271 and/or continuous monitoring in search of pre-earthquake signals (İnan et al., 2008; İnan  
272 et al., 2010).

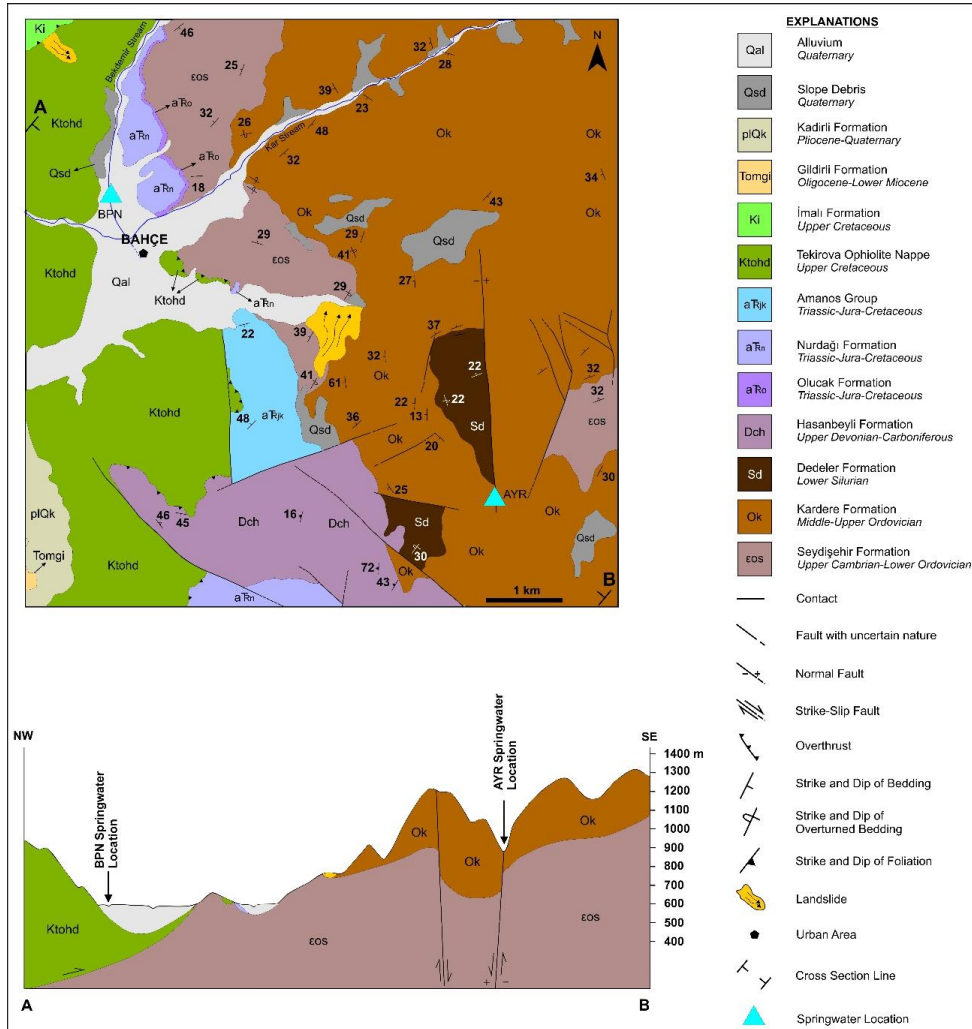

273

274 **Figure 2.** Locations and local geology of the water springs. (Modified from Usta et al.,  
 275 2015 and 2017). The Ayrancı spring water emanates from a fault in the Metamorphic  
 276 Kardere Formation (blue triangle shown at the lower right in the map) whereas the  
 277 Bahçe spring water is obtained from the Quaternary Alluvium (blue triangle shown  
 278 at the upper left in the map).

279

280 Variations of major ions in the AYR spring water samples are significant. It is clear that  
 281 pre-earthquake anomalies exceed the  $\alpha_e$  (Figures 3B and Table 2). Before any  
 282 interpretation, we need to make sure that geochemical time series are not affected by  
 283 meteorological conditions. In this context, meteorological data have been obtained from



284 the Osmaniye Meteorology Station (located about 32 km SW of the AYR spring) and the  
 285 daily average air temperature and rainfall are shown in Figure 3c.

286 **Table 2.** Ec and major ion analysis results for the Ayran (AYR) and the Ec analysis results  
 287 for the Bahçepınar (BPN) bottled waters. The data for  $\text{Ca}^{2+}$ ,  $\text{Mg}^{2+}$ ,  $\text{K}^+$ ,  $\text{Na}^+$ ,  $\text{Cl}^-$ ,  $\text{SO}_4^{2-}$  for  
 288 the AYR samples are plotted in Figure 3B. Standard deviation ( $2\sigma$ ) has been computed  
 289 considering cations/anions contents of samples dated from 15 February to 31 March  
 290 2023; the period which is considered to nearly represent background concentrations of  
 291 the water. These samples are marked in bold fonts.

| Sample ID     | Date                               | $\text{Cl}^-$ | $\text{SO}_4^{2-}$ | $\text{Na}^+$ | $\text{K}^+$ | $\text{Mg}^{+2}$ | $\text{Ca}^{+2}$ | AYR Ec     | Date       | BPN Ec |
|---------------|------------------------------------|---------------|--------------------|---------------|--------------|------------------|------------------|------------|------------|--------|
| AYR 1         | 08.03.2022                         | 2.99          | 8.34               | 4.34          | 0.39         | 3.22             | 6.92             | 50         | 19.09.2022 | 220    |
| AYR 2         | 14.09.2022                         | 7.37          | 13.08              | 12.10         | 1.08         | 7.73             | 17.54            | 150        | 07.11.2022 | 230    |
| AYR 3         | 06.10.2022                         | 9.73          | 14.79              | 15.08         | 1.34         | 9.20             | 20.10            | 180        | 12.12.2022 | 230    |
| AYR 4         | 03.11.2022                         | 9.99          | 15.52              | 15.66         | 1.39         | 9.50             | 20.72            | 170        | 19.12.2022 | 220    |
| AYR 5         | 13.12.2022                         | 7.45          | 13.43              | 11.93         | 1.05         | 7.59             | 16.58            | 150        | 30.12.2022 | 220    |
| AYR 6         | 26.12.2022                         | 11.06         | 17.35              | 16.49         | 1.56         | 10.19            | 22.19            | 190        | 08.01.2023 | 220    |
| AYR 7         | 29.12.2022                         | 11.08         | 17.20              | 16.84         | 1.50         | 10.20            | 22.33            | 180        | 20.01.2023 | 220    |
| AYR 8         | 30.12.2022                         | 10.97         | 17.29              | 16.78         | 1.50         | 10.17            | 22.28            | 190        | 24.01.2023 | 220    |
| AYR 9         | 03.01.2023                         | 10.62         | 17.23              | 16.26         | 1.45         | 10.06            | 23.04            | 170        | 28.01.2023 | 220    |
| AYR 10        | 06.01.2023                         | 11.12         | 17.56              | 16.91         | 1.49         | 10.29            | 22.51            | 190        | 04.02.2023 | 220    |
| AYR 11        | 11.01.2023                         | 11.41         | 17.96              | 16.90         | 1.50         | 10.43            | 22.81            | 190        | 11.02.2023 | 220    |
| AYR 12        | 12.01.2023                         | 11.60         | 18.21              | 17.22         | 1.53         | 10.50            | 22.99            | 200        | 17.02.2023 | 220    |
| AYR 13        | 27.01.2023                         | 9.83          | 16.20              | 14.24         | 1.25         | 8.89             | 19.35            | 160        | 18.02.2023 | 230    |
| AYR 14        | 31.01.2023                         | 11.04         | 17.62              | 15.81         | 1.39         | 9.87             | 21.58            | 180        | 02.03.2023 | 230    |
| AYR 15        | 01.02.2023                         | 11.43         | 17.85              | 16.21         | 1.43         | 10.04            | 21.97            | 190        | 13.03.2023 | 220    |
| AYR 16        | 10.02.2023                         | 9.09          | 15.59              | 13.29         | 1.16         | 8.46             | 18.33            | 180        | 22.03.2023 | 230    |
| AYR 17        | 12.02.2023                         | 6.00          | 12.47              | 9.36          | 0.79         | 6.29             | 13.51            | 120        |            |        |
| AYR 18        | 13.02.2023                         | 4.25          | 10.69              | 6.96          | 0.56         | 4.95             | 10.38            | 90         |            |        |
| <b>AYR 19</b> | <b>15.02.2023</b>                  | <b>3.54</b>   | <b>10.30</b>       | <b>6.28</b>   | <b>0.50</b>  | <b>4.79</b>      | <b>9.65</b>      | <b>80</b>  |            |        |
| <b>AYR 20</b> | <b>16.02.2023</b>                  | <b>3.56</b>   | <b>13.64</b>       | <b>7.51</b>   | <b>0.67</b>  | <b>6.91</b>      | <b>12.60</b>     | <b>110</b> |            |        |
| <b>AYR 21</b> | <b>28.02.2023</b>                  | <b>3.29</b>   | <b>10.54</b>       | <b>5.79</b>   | <b>0.47</b>  | <b>4.60</b>      | <b>9.23</b>      | <b>80</b>  |            |        |
| <b>AYR 22</b> | <b>02.03.2023</b>                  | <b>3.26</b>   | <b>10.08</b>       | <b>5.48</b>   | <b>0.44</b>  | <b>4.20</b>      | <b>8.59</b>      | <b>70</b>  |            |        |
| <b>AYR 23</b> | <b>11.03.2023</b>                  | <b>3.36</b>   | <b>9.85</b>        | <b>5.49</b>   | <b>0.43</b>  | <b>4.21</b>      | <b>8.62</b>      | <b>70</b>  |            |        |
| <b>AYR 24</b> | <b>13.03.2023</b>                  | <b>3.28</b>   | <b>9.91</b>        | <b>5.47</b>   | <b>0.44</b>  | <b>4.22</b>      | <b>8.68</b>      | <b>70</b>  |            |        |
| <b>AYR 25</b> | <b>20.03.2023</b>                  | <b>3.28</b>   | <b>9.96</b>        | <b>5.36</b>   | <b>0.43</b>  | <b>4.22</b>      | <b>8.73</b>      | <b>70</b>  |            |        |
| <b>AYR 26</b> | <b>24.03.2023</b>                  | <b>3.20</b>   | <b>10.02</b>       | <b>5.35</b>   | <b>0.42</b>  | <b>4.14</b>      | <b>8.45</b>      | <b>70</b>  |            |        |
| <b>AYR 27</b> | <b>31.03.2023</b>                  | <b>3.31</b>   | <b>10.13</b>       | <b>5.40</b>   | <b>0.43</b>  | <b>4.16</b>      | <b>8.47</b>      | <b>70</b>  |            |        |
|               | <i>mean</i>                        | 0.37          | 1.13               | 0.60          | 0.05         | 0.46             | 0.94             | 7.78       |            |        |
|               | $\Sigma$                           | 0.33          | 1.19               | 0.79          | 0.08         | 0.88             | 1.34             | 13.64      |            |        |
|               | $2\sigma$                          | 0.65          | 2.38               | 1.57          | 0.17         | 1.76             | 2.68             | 27.28      |            |        |
|               | <i>mean +1 <math>\sigma</math></i> | 3.64          | 11.32              | 6.19          | 0.51         | 5.04             | 9.81             | 83.64      |            |        |
|               | <i>mean +2 <math>\sigma</math></i> | 2.99          | 8.94               | 4.62          | 0.35         | 3.28             | 7.13             | 56.36      |            |        |

292

293 Air temperature gradually decreases from about 30°C in September 2022 to less than  
 294 10°C in February 2023 (Figure 3C). Daily rainfall is noticeably present in November 2022  
 295 and March 2023. Normally, variations in air temperature are not expected to affect the  
 296 chemical contents of the spring water (İnan et al., 2010 and 2012) but the effect of rainfall



297 on soil radon concentration **is dominant** (Inan et al., 2008, 2010, 2012b, Seyis et al.,  
298 2022). All earthquakes listed in Table 1 are plotted on the meteorology time series in  
299 Figure 3C and this shows that major and heavy rainfall took place right after the  
300 devastating earthquakes of 6 February 2023. Based on the relatively low EC and low  
301 major ion contents of the AYR spring water (Table 2) that is bottled and commercially  
302 distributed, it can be said that this water is of shallow origin (Di Luccio et al., 2018). A  
303 comparison of the geochemical time series and significant variations shown in Figure 3B  
304 and the daily average rainfall data shown in Figure 3C reveals no correlations. Inan et al.  
305 (2010 and 2012) compared meteorological time series with hydrogeochemical time series  
306 and noted that meteorological conditions do not seem to play a role in water's major ion  
307 contents. In this study, we compare rainfall data and geochemical time series (Figure 3)  
308 and, as there is no correlation, we conclude that the increase of major ion contents  
309 observed in AYR spring waters are not related to atmospheric variations (e.g., rainfall).  
310 Therefore, it is safe to conclude that the chemical changes recorded in the spring water  
311 must be related to crustal deformation associated with earthquake stress buildup.

312 As shown in Figure 3B, changes in the concentration of the major ionic species dissolved  
313 in the AYR spring water were observed. Positive anomalies are recorded in the  $\text{Ca}^{2+}$ ,  
314  $\text{Mg}^{2+}$ ,  $\text{K}^+$ ,  $\text{Na}^+$ ,  $\text{Cl}^-$ , and  $\text{SO}_4^{2-}$  contents (mg/l) before the 6 February Mw 7.7 and 7.6  
315 Kahramanmaraş Earthquakes (Figure 3b; Table 2). These positive anomalies (increase  
316 in dissolved ion content) started as early as September 2022; suggesting a pre-  
317 earthquake anomaly of nearly six months. Considering Sultankhodhaev's (1984) relation  
318 ( $\log(DT) = 0.63 * M - b$ ) between earthquake magnitude, precursory anomaly duration,  
319 and the distance of the earthquake epicenter to the monitoring site, such a long duration  
320 (six months) of a precursory anomaly we report in this study is very likely because the  
321 magnitudes of the 7.7 and 7.6 devastating earthquakes are sufficiently big to cause such  
322 a long precursory anomaly at a location about 100 km from the epicenter. Considering  
323 the relation proposed by Sultankhodhaev (1984), such a magnitude of the earthquake  
324 theoretically **should lead to months-long of precursory anomaly** in the geochemical  
325 parameters at locations hundreds of kilometers far from the epicentral area.



326 In regard to changes in the dissolved ions in the AYR spring water, the following changes  
327 are **imminent**. The  $\text{Ca}^{2+}$  and  $\text{Na}^+$  content increase (for the period between September  
328 2022 to 15 February 2023) above the background by about 14 (mg/l) and 10 (mg/l),  
329 respectively, and reach up to 22 (mg/l) and 16 (mg/l), respectively. This increase started  
330 about six months before the 6 February earthquakes (EQ # 1 and EQ #2). Since we could  
331 not obtain samples between 8 March 2022 and 14 September 2022, the anomaly could  
332 have possibly started even earlier (any time between March and August 2022); so the  
333 positive anomaly (e.g., increase) in the major ions started at least six months before the  
334 6 February 2023 earthquakes. The  $\text{Mg}^{2+}$  content also increased from about 4 (mg/l) to 10  
335 (mg/l) in the period September 2022 to 15 February 2023. Similar major increases were  
336 also detected in  $\text{Cl}^-$ , and  $\text{SO}_4^{2-}$  contents. Water samples are relatively poor in  $\text{K}^+$  content  
337 therefore the increase, due to the scale of the graph, is not very obvious in Figure 3B.  
338 However, the values given in Table 2 clearly indicate about four times an increase in the  
339  $\text{K}^+$  content compared to the background concentrations (post-seismic samples collected  
340 between February 15 and 31 March 2023).

341 **The pre-earthquake anomaly** in the AYR water samples is characterized by an increase  
342 of up to 400% for the Ec and also major ions; namely  $\text{Ca}^{2+}$ ,  $\text{Mg}^{2+}$ ,  $\text{K}^+$ ,  $\text{Na}^+$ ,  $\text{Cl}^-$ , and  $\text{SO}_4^{2-}$   
343 before the 6 February 2023 Mw 7.7 and Mw 7.6 earthquakes (Figure 3B). Post-  
344 earthquake samples show decreasing trends in all major ions. Analyses results of the  
345 post-earthquake dated samples show that the spring water has had chemical stability  
346 since the Middle February-Early March 2023; just two to three weeks after the  
347 earthquakes (Figure 3B). We have also obtained a chemical analysis report on AYR water  
348 submitted with the business license application of the company dated 29 August 2012.  
349 The chemical analysis data of the samples collected more than 10 years ago include  
350 values only for  $\text{Na}^+$ ,  $\text{Cl}^-$ , and  $\text{SO}_4^{2-}$  as 3.86, 3.12, and 8.37 mg/l, respectively. These  
351 values are very close to the analysis result of the AYR water sample dated 8 March 2022  
352 (AYR 1 which is the oldest sample in our data set) and the AYR water samples collected  
353 after 15 February (Table 2); confirming that these samples represent background values  
354 for the AYR spring water.



355 Immediately after the earthquake, the values started to decrease suggesting a reversible  
356 chemical change (Figure 3B; Table 2). It is worth mentioning that the broad positive  
357 anomaly detected in the AYR water chemistry (Figure 3B) that lasted for about six months  
358 before the Mw 7.7 and Mw 7.6 earthquakes shows some transient decreases (about  
359 Middle December 2022 and toward the end of January 2023). Following each transient  
360 decrease, an increase in ion contents is observed and the broad positive anomaly  
361 (starting from September 2022) is sustained until the date of the major earthquakes of 6  
362 February 2023. The observations of sudden decrease and rebound in the major ion  
363 contents of the water samples (taking place in Mid December 2022 and end of January  
364 2023) may suggest sudden and short-lived crustal stress release related to smaller  
365 earthquakes (e.g., EQ # 4 and EQ # 5). Soon after the major earthquakes (EQ # 1 and  
366 EQ # 2), the major ion contents of the water samples show a sharp decline; almost  
367 approaching the background values as early as 15 February 2023. One single positive  
368 anomaly after the major earthquakes (EQ #1 and EQ #2) is detected in the sample dated  
369 16 February 2023. The further increase of the ion contents of this sample seems to  
370 suggest a short-term stress buildup prior to EQ # 3 (Mw 6.4) that occurred about 120 km  
371 to the south of the Ayran Spring water location (Figure 1B). Considering Dobrovolsky et  
372 al.'s (1979) theoretical relation ( $R= 10^{0.43 \cdot M}$ ), an increase in major ions contents of the  
373 Ayran Spring water is very likely to take place due to an earthquake of magnitude 6.4  
374 occurring in 120 km distance.

375

376

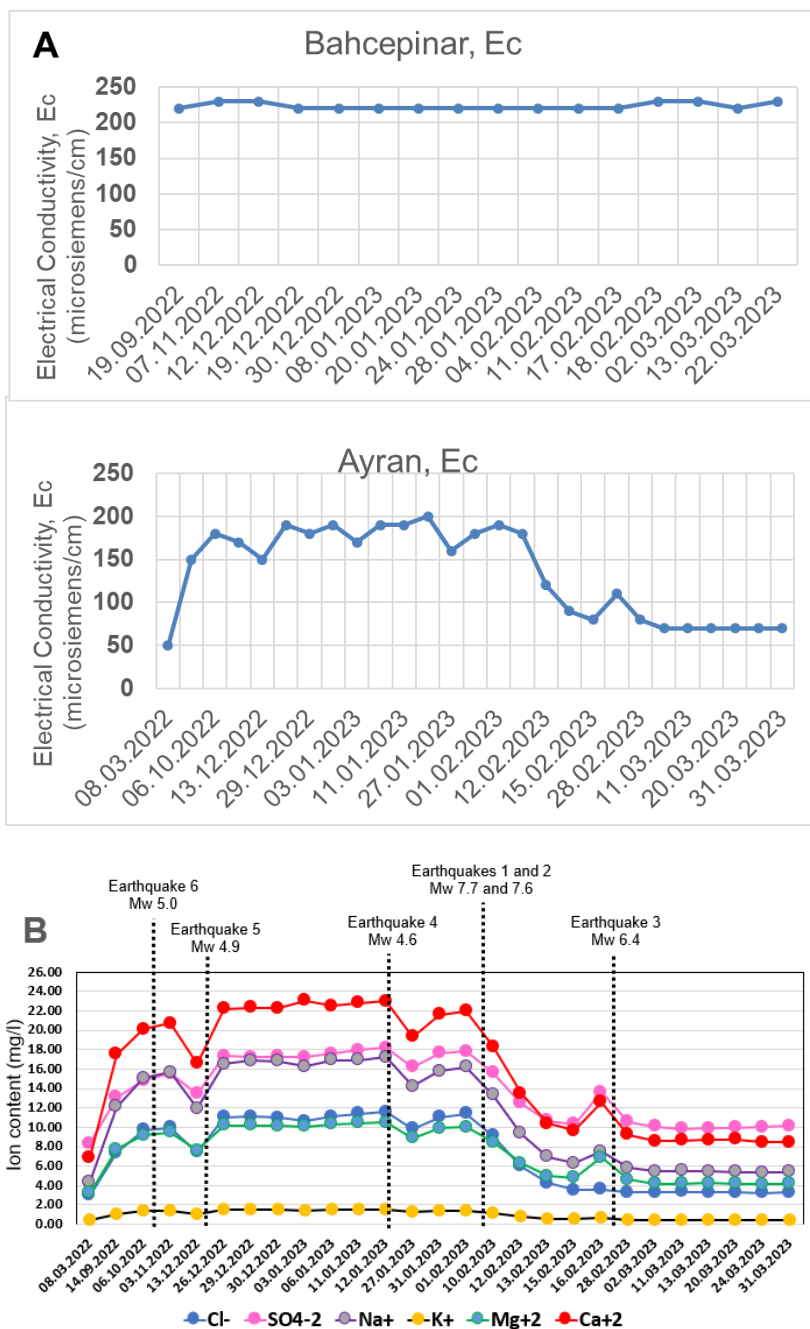

377

378

379 **Figure 3.** Time variation graphs of Ec for the Ayran (AYR) and the Bahçepinar (BPN)  
 380 bottled waters (A) and major ions for the AYR bottled waters (B). All data are listed in  
 381 Table 2.



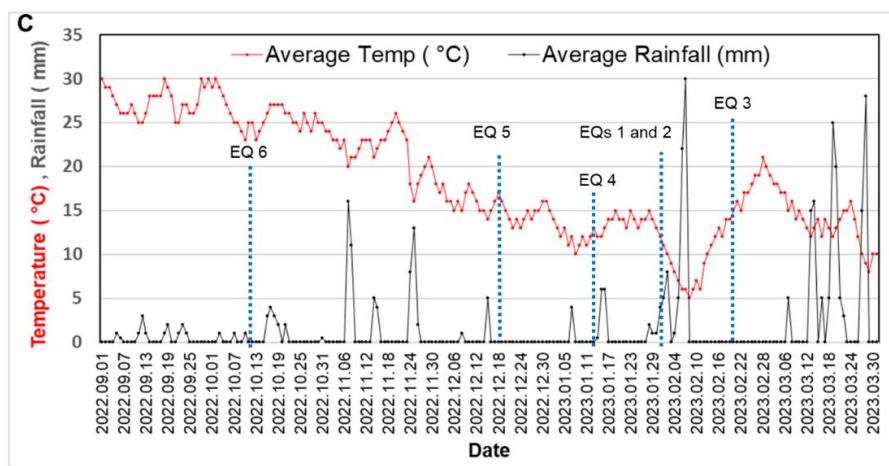

382

383 **Figure 3. Cont.** Daily average air temperature and rainfall at the Osmaniye meteorology  
384 station (37°07'N, 36°25'E; 32 km SW of the Ayran spring) between 1 September 2022  
385 and 30 March 2023 (C).

386 ([https://www.meteoblue.com/tr/hava/historyclimate/weatherarchive/  
387 osmaniye\\_turkiye\\_303195](https://www.meteoblue.com/tr/hava/historyclimate/weatherarchive/osmaniye_turkiye_303195)). EQ1 through EQ6 are the earthquakes listed in Table 1.

388

389 We have shown and discussed the reliable precursory anomalies in the major ions of the  
390 bottled AYR spring water prior to the Mw 7.7 and Mw 7.6 earthquakes that occurred in  
391 the Kahramanmaraş region on 6 February 2023. However, the process(es) leading to the  
392 build-up of geochemical anomalies related to the earthquake cannot be inferred with  
393 certainty. However, some inferences based on previous observations can be made. For  
394 instance, Sibson (1992) suggested that extensive hydro-fracture dilatancy might develop  
395 prior to failure leading to the earthquake. Development of fractures probably enhances  
396 water circulation and mixing of different reservoirs leading to pre-earthquake anomalies  
397 (Italiano et al., 2004; Federico et al., 2008; İnan et al., 2010; İnan et al., 2012c; Skelton  
398 et al., 2014; Ingebritsen and Manga, 2014; Doglioni et al., 2014; Barberio et al., 2017;  
399 Skelton et al., 2019; Wang and Manga, 2021; Gori and Barberio, 2022;). Although the  
400 process(es) responsible for chemical anomalies detected in the Ayran spring waters prior  
401 to the 6 February 2023 earthquakes cannot be suggested with any certainty at this stage,  
402 two immediate mechanisms emerge: 1) a simple increase in fluid flow in the surrounding  
403 of the future epicenter and selective dissolution of some K–Mg–Ca-rich rocks (e.g.,



404 Federico et al., 2008); or 2) “electro-corrosion” whereby the dissolution of rocks is  
405 accelerated by the flow of stress-activated positive hole currents (Balk et al., 2009;  
406 Freund, 2011; Paudel et al., 2018). Following the second mechanism, the increased  
407 content of major ions in water could be related to the oxidation of water to hydrogen  
408 peroxide at the rock-water interface (Balk et al., 2009; Paudel et al., 2018). Freund (2011)  
409 suggested that with the positive hole current flowing, the “corrosion” of the rock is  
410 accelerated releasing into the water major cations and anions. Further work to be  
411 conducted in this area may enable us to suggest the process(es) responsible for the pre-  
412 earthquake geochemical anomalies we have discussed in the AYR spring water.

413

## 414 5. Conclusions

415

416 Hydrogeochemical precursors have been detected in commercially bottled water samples  
417 of natural springs (Ayran Spring and Bahçepinar Spring) emanating from a location about  
418 100 km distance from the epicenter of the Mw 7.7 Kahramanmaraş Earthquake of 6  
419 February 2023. The pre-earthquake anomaly is characterized by an increase in  $\text{Ca}^{2+}$ ,  
420  $\text{Mg}^{2+}$ ,  $\text{K}^+$ ,  $\text{Na}^+$ ,  $\text{Cl}^-$ , and  $\text{SO}_4^{2-}$  content in the bottled water samples of the Ayran spring.  
421 Samples that are dated after the earthquakes (covering about two months after the  
422 earthquake) show decreasing trends in all major ions. About three weeks after the  
423 earthquake, the major ion contents of the spring water attained stability. At least six  
424 months of pre-earthquake anomaly (increase) in the major ions content of the Ayran  
425 spring water is imminent. It is worth noting that the Bahçepinar Spring water samples did  
426 not show any anomalies in electrical conductivity therefore the samples were not  
427 analyzed for ion content. Bahçepinar water is collected from shallow boreholes dug into  
428 alluvial deposits which, we believe, are decoupled from the basement rocks and this may  
429 be the reason for the lack of any significant change in the water chemistry prior to the  
430 earthquakes. Here, we remind that geological knowledge of the investigated area and the  
431 sampling site have paramount importance in sampling discrete samples for geochemical  
432 analysis and/or conducting continuous monitoring. The results of this study suggest that  
433 spring water chemical anomalies may be monitored as proxy indicators of pre-earthquake



434 crustal deformation. The physical mechanisms of the observed precursors are yet  
435 impossible to explain with certainty at this stage. In order to be able to suggest the  
436 mechanism(s) leading to the reported pre-earthquake geochemical anomalies, more work  
437 needs to be conducted; especially multi-disciplinary (seismological, geodetical,  
438 geochemical) and continuous earthquake monitoring networks must be established and  
439 run for a sufficiently long time.

440

#### 441 **Acknowledgements**

442 We appreciate all the technical help we have received on ion chromatography analyses  
443 from Ms. Sevde Korkut at the Istanbul Technical University MEM-TEK laboratory. We  
444 thank Mr. Asen Sabuncu (Istanbul Technical University) and Dr. Teach. Assist. Emre  
445 Pınarcı (Çukurova University) for help in drafting the figures. We also thank Assoc. Prof  
446 Dr. Tülay İnan for help in conducting electrical conductivity measurements of the bottled  
447 water samples. This work has been partially supported by Istanbul Technical University  
448 Scientific Research Fund (ITU BAPSIS) Project # 44774.

#### 449 **Authors contributions**

450 S.I. and H.C. conceived the project; H.C. collected the samples; N.Y. coordinated  
451 laboratory analysis, compiled seismic events, and prepared the figures; S.I. was the  
452 primary interpreter of the data. S.I. and H.C. were writers of the manuscript with  
453 contributions from N.Y.

#### 454 **References**

- 455 Allen, C.R.: Active faulting in northern Turkey, Division of Geological Sciences, California  
456 Institute of Technology, Contribution No. 1577. 32 pp, 1969.
- 457 Ambraseys, N.N.: Temporary seismic quiescence: SE Turkey. *Geophys. J. Int.*, 96, 311–  
458 331, <https://doi.org/10.1111/j.1365-246X.1989.tb04453.x>, 1989.
- 459 Areshidze, G., Bella, F., Biagi, P. F., Caputo, M., Della Monica, G., Ermini, A.,  
460 Manjgaladze, P., Melikazdze, G., Sgrigna, V. and Zilpimani, D.: No preseismic evidence  
461 from hydrogeochemical parameters on the occasion of April 29, 1991 Georgian



- 462 Earthquake, *Caucasus, Tectonophysics*, 213, 353–358, [https://doi.org/10.1016/0040-1951\(92\)90463-Gö](https://doi.org/10.1016/0040-1951(92)90463-Gö) 1992.
- 463
- 464 Arpat, E., Şaroğlu, F.: Dogu Anadolu fayı ile ilgili bazı gözlem ve düşünceler (Some  
465 observations and thoughts on the East Anatolian fault). *Bulletin of the General Directorate  
466 of Mineral Research and Exploration of Turkey (MTA)* 73, 44–50, 1972.
- 467 Balk, M., Bose, M., Ertem, G., Rogoff, D. A., Rothschild, L. J. and Freund, F.T.: Oxidation  
468 of water to hydrogen peroxide at the rock-water interface due to stress-activated electric  
469 currents in rocks, *Earth Planet Sc. Lett.*, 283, 87–92.  
470 <https://doi.org/10.1016/j.epsl.2009.03.044>, 2009.
- 471 Barberio, M.D., Barbieri, M., Billi, A., Doglioni, C., Petitta, M.: Hydrogeochemical changes  
472 before and during the 2016 Amatrice-Norcia seismic sequence (central Italy). *Sci. Rep-  
473 UK*, 7, 11735. <https://doi.org/10.1038/s41598-017-11990-8>, 2017.
- 474 Barka, A. A. and Reilinger, R.: Active tectonics of the Eastern Mediterranean region  
475 deduced from GPS, neotectonic and seismicity data, *Ann. Geophys-Italy*, 40, 587-610,  
476 <http://hdl.handle.net/2122/1520>, 1997.
- 477 Barka, A.A., Kadinsky-Cade, K.: Strike-slip fault geometry in Turkey and its influence on  
478 earthquake activity, *Tectonics*, 7, 663–684, <https://doi.org/10.1029/TC007i003p00663>,  
479 1988.
- 480 Bella, F., Biagi, P.F., Caputo, M., Cozzi, Della Monica, G., Ermini, A., Gordeez, E.I.,  
481 Khatkevich, Y.M., Martinelli, G., Plastino, W., Scandone, R., Sgrigna, V., Zilpimiani, D.:  
482 Hydrogeochemical anomalies in Kamchatka (Russia), *Phys. Chem. Earth.*, 23, 921-925,  
483 [https://doi.org/10.1016/S0079-1946\(98\)00120-7](https://doi.org/10.1016/S0079-1946(98)00120-7), 1998.
- 484 Birchard, G.F., Libby, W.F.: Earthquake associated radon anomalies possible  
485 mechanisms, *Eos Trans. AGU* 59, 4, 329, 1978.
- 486 Bozkurt, E.: Neotectonics of Turkey—a synthesis, *Geodin. Acta*, 14, 3–30,  
487 <https://doi.org/10.1080/09853111.2001.11432432>, 2001.
- 488 Cetin, H., Guneyli, H., Mayer, L.: Paleoseismology of the Palu–Lake Hazar segment of  
489 the East Anatolian Fault Zone, Turkey, *Tectonophysics* 374, 163–197,  
490 <http://dx.doi.org/10.1016/j.tecto.2003.08.003>, 2003.
- 491 Chorowicz, J., Luxey, P., Lyberis, N., Carvalho, J., Parrot, J.F., Yurur, T. and Gundogdu,  
492 N.: The Maras Triple Junction (southern Turkey) based on digital elevation model and  
493 satellite imagery interpretation, *J. Geophys. Res.*, 99, B10, 20225–20242,  
494 <https://doi.org/10.1029/94JB00321>, 1994.
- 495 Cicerone, R.D., Ebel, J.E., Britton, J.: A systematic compilation of earthquake precursors,  
496 *Tectonophysics*, 476, 371-396. <https://doi.org/10.1016/j.tecto.2009.06.008>, 2009.

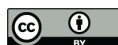

- 497 Claesson, L., Skelton, A., Graham, C., Dietl, C., Mörth, M., Torssander, P., Kockum, I.:  
498 Hydrogeochemical changes before and after a major earthquake, *Geology*, 32, 641–644,  
499 <https://doi.org/10.1130/G20542.1>, 2004.
- 500 Conti, L., Picozza, P., Sotgiu, A.: A critical review of ground-based observations of  
501 earthquake precursors, *Front. Earth Sci.*, 9, <https://doi.org/10.3389/feart.2021.676766>,  
502 2021.
- 503 Dewey, J.F. and Şengör, A.M.C.: Aegean and surrounding regions: complex multi-plate  
504 and continuum tectonics in a convergent zone, *Geol. Soc. Am. Bull.*, 90, 84–92,  
505 [https://doi.org/10.1130/0016-  
506 7606%281979%2990%3C84%3AAASRCM%3E2.0.CO%3B2](https://doi.org/10.1130/0016-7606%281979%2990%3C84%3AAASRCM%3E2.0.CO%3B2), 1979.
- 507 Dewey, J.F., Pitman, W.C., Ryan, W.B.F., Bonnin, J.: Plate tectonics and the evolution of  
508 the Alpine system. *Geol. Soc. Am. Bull.*, 84, 3137–3180, [https://doi.org/10.1130/0016-  
509 7606\(1973\)84%3C3137:PTATEO%3E2.0.CO;2](https://doi.org/10.1130/0016-7606(1973)84%3C3137:PTATEO%3E2.0.CO;2), 1973.
- 510 Di Luccio, F., Chiodini, G., Caliro, S., Cardellini, C., Convertito, V., Pino, N.A., Tolomei,  
511 C., Ventura, G.: Seismic signature of active intrusions in mountain chains. *Science*  
512 *Advances* 4, e1701825. <https://doi.org/10.1126/sciadv.1701825>, 2018.
- 513 Dobrovolsky, I.P., Zubkov, S.I. and Miachkin, V.I.: Estimation of the size of earthquake  
514 preparation zones, *Pure and Applied Geophysics* 117, 1025–1044,  
515 <https://doi.org/10.1007/BF00876083>, 1979.
- 516 Doglioni, C., Barba, S., Carminati, E., Riguzzi, F.: Fault on–off versus coseismic fluids  
517 reaction, *Geosci. Front.*, 5 (6), 767–780, <https://doi.org/10.1016/j.gsf.2013.08.004>, 2014.
- 518 Etiope, G., Calcara, M. and Quattrocchi, F.: Seismogeochemical algorithms for  
519 earthquake prediction: a review, *Ann. Geophys-Italy*, 40(6), 1483–1492,  
520 <http://hdl.handle.net/2122/1524>, 1997.
- 521 Federico C., Pizzino, L., Cinti, D., De Gregorio, S., Favara, R., Galli, G., Giudice, G.,  
522 Guerrieri, S., Quattrocchi, F. and Voltattorni, N.: Inverse and forward modeling of  
523 groundwater circulation in a seismically active area (Monferrato, Piedmont, NW Italy):  
524 insights into stress-induced variations in water chemistry, *Chem. Geol.*, 248, 14–39,  
525 <http://dx.doi.org/10.1016/j.chemgeo.2007.10.007>, 2008.
- 526 Freund, F. T.: Pre-earthquake signals: Underlying physical processes. *J. Asian Earth Sci.*,  
527 41, 383–400, <https://doi.org/10.1016/j.jseaes.2010.03.009>, 2011.
- 528 Freund, F.T.: Earthquake probabilities and pre-earthquake signals, *Current Science*, 94,  
529 311–313, <https://www.jstor.org/stable/24100338>, 2008.
- 530 Freund, F.T., Takeuchi, A., Lau, B.W.S.: Electric currents streaming out of stressed  
531 igneous rocks – A step towards understanding pre-earthquake low frequency EM



- 532 emissions, *Phys. Chem. Earth*, 31, 389-396, <https://doi.org/10.1016/j.pce.2006.02.027>,  
533 2006.
- 534 Gori, F. and Barberio, M.D.: Hydrogeochemical changes before and during the 2019  
535 Benevento seismic swarm in central-southern Italy, *J. Hydrol.*, 604,  
536 <https://doi.org/10.1016/j.jhydrol.2021.127250>, 2022.
- 537 Grant, R. A., Halliday, T., Balderer, W. P., Leuenberger, F., Newcomer, M., Cyr, G. and  
538 Freund, F. T.: Groundwater chemistry changes before major earthquakes and possible  
539 effects on animals, *Int. J. Environ. Res. PU*, 1936–1956,  
540 <https://doi.org/10.3390%2Fijerph8061936>, 2011.
- 541 Geller, R. J., Jackson, D. D., Kagan, Y. Y., and Mulargia, F.: Earthquake cannot be  
542 predicted, *Science*, 275, 1616–1617, <https://doi.org/10.1126/science.275.5306.1616>,  
543 1997.
- 544 Hancock, P. L. and Barka, A. A.: Kinematic indicators on active normal faults in western  
545 Turkey. *J. Struct Geol.*, 9, 415-430, [https://doi.org/10.1016/0191-8141%2887%2990142-  
546 8](https://doi.org/10.1016/0191-8141%2887%2990142-8), 1987.
- 547 Hartmann, J. and Levy, J. K.: The influence of seismotectonic on precursory changes in  
548 groundwater composition for the 1995 Kobe earthquake, Japan. *Hydrology Journal*, 14,  
549 1307–1318, <https://doi.org/10.1007/s10040-006-0030-7>, 2006.
- 550 Hempton, M.R.: The North Anatolian fault and complexities of continental escape. *J. Struct*  
551 *Geol.*, 4, 502 – 504, [https://doi.org/10.1016/0191-8141\(82\)90041-4](https://doi.org/10.1016/0191-8141(82)90041-4), 1982.
- 552 Hauksson, E.: Radon content of groundwater as an earthquake precursor: Evaluation of  
553 worldwide data and physical basis, *J. Geophys. Res.* 86, B10, 9397-9410,  
554 <https://doi.org/10.1029/JB086iB10p09397>, 1981.
- 555 İnan, S., Ergintav, S., Saatçılar, S., Tüzel, B. and İravul, Y.: Turkey makes major  
556 investments in earthquake research. *EOS Transactions* 88, 333–334,  
557 <https://doi.org/10.1029/2007EO340002>, 2007.
- 558 İnan, S., Akgül, T., Seyis, C., Saatçılar, R., Baykut, S., Ergintav, S. and Bas, M.:  
559 Geochemical monitoring in the Marmara Region (NW Turkey): A search for precursors of  
560 seismic activity, *J. Geophys. Res.* 113, B03401, <https://doi.org/10.1029/2007JB005206>,  
561 2008.
- 562 İnan, S., Ertekin, K., Seyis, C., Şimşek, S., Kulak, F., Dikbaş, A., Tan, O., Ergintav, S.,  
563 Çakmak, R., Yörük, A., Çergel, M., Yakan, H., Karakuş, H., Saatçılar, R., Akçiğ, Z., İravul,  
564 Y. and Tüzel, B. (2010) Multi-disciplinary earthquake researches in Western Turkey: Hints  
565 to select sites to study geochemical transients associated to seismicity. *Acta Geophys.*,  
566 58, 767–813, <https://doi.org/10.2478/s11600-010-0016-7>, 2010.
- 567 İnan, S., Pabuçcu, Z., Kulak, F., Ergintav, S., Tatar, O., Altunel, E., Akyüz, S., Tan, O.,  
568 Seyis, C., Çakmak, R., Saatçılar, R. and Eyidogan, H.: Microplate boundaries hindering ~



- 569 pre-earthquake strain transfer (Western Turkey): inferences from continuous  
570 geochemical monitoring, *J. Asian Earth Sci.*, 48, 56-71,  
571 <http://dx.doi.org/10.1016/j.jseaes.2011.12.016>, 2012a.
- 572 İnan, S., Kop, A., Çetin, H., Kulak, F., Pabuççu, Z., Seyis, C., Ergintav, S., Tan, O.,  
573 Saatçılar, S. and Bodur, M. N.: Seasonal variations in soil radon emanation: Long term  
574 continuous monitoring in light of seismicity, *Nat. Hazards*, 62, 575-591,  
575 <https://doi.org/10.1007/s11069-012-0096-6>, 2012b.
- 576 İnan, S., Balderer, W.P., Leuenberger-West, F., Yakan, H., Özvan, A., Freund, F.T.:  
577 Springwater chemical anomalies prior to the Mw = 7.2 Van Earthquake  
578 (Turkey). *Geochem J.*, 46, e11-e16, <https://doi.org/10.2343/geochemj.1.0159>, 2012c.
- 579  
580 Ingebritsen, S.E., Manga, M.: Earthquakes: hydrogeochemical precursors. *Nat. Geosci.*,  
581 7, 697–698. <https://doi.org/10.1038/ngeo2261>, 2014.
- 582 Italiano, F., Martinelli, G. and Rizzo, A.: Geochemical evidence of seismogenic-induced  
583 anomalies in the dissolved gases of thermal waters: A case study of Umbria (Central  
584 Apennines, Italy) both during and after the 1997–1998 seismic swarm, *Geochem.*  
585 *Geophys. Geosy.*, 5, Q11001, <https://doi.org/10.1029/2004GC000720>, 2004.
- 586 Jackson, J. and McKenzie, D.P.: Active tectonics of the Alpine–Himalayan Belt between  
587 western Turkey and Pakistan, *Geophys. J. Roy. Astr. S.*, 77, 185–264,  
588 <https://doi.org/10.1111/j.1365-246X.1984.tb01931.x>, 1984.
- 589 Karig, D.E. and Kozlu, H.: Late Palaeogene – Neogene evolution of the triple junction  
590 region near Maras, south-central Turkey, *J. Geol. Soc. London*, 147, 1023–1034,  
591 <https://doi.org/10.1144/gsjgs.147.6.1023>, 1990.
- 592 Kelling, G., Gökçen, S.L., Floyd, P.A. and Gökçen, N.: Neogene tectonics and plate  
593 convergence in the Eastern Mediterranean: new data from southern Turkey, *Geology*, 15,  
594 425–429, [https://doi.org/10.1130/0091-7613\(1987\)15%3C425:NTAPCI%3E2.0.CO;2](https://doi.org/10.1130/0091-7613(1987)15%3C425:NTAPCI%3E2.0.CO;2)  
595 1987.
- 596 Kempler, D. and Garfunkel, Z.: Northeast Mediterranean triple junction from a plate  
597 kinematics point of view, *Bulletin of the Technical University of Istanbul, Special Issue* 44,  
598 425–454, 1991.
- 599 Ketin, I.: Über die tektonisch-mechanischen Folgerungen aus den grossen anatolischen  
600 Erdbeben des letzten Dezenniums, *Geol. Rundsch.*, 36, 77–83,  
601 <https://doi.org/10.1007/BF01791916>, 1948.
- 602 King, J. Y., Koizumi, Y. and Kitagawa, Y.: Hydrogeochemical anomalies and the 1995  
603 Kobe Earthquake, *Science*, 269, 38–39, <https://doi.org/10.1126/science.269.5220.38>,  
604 1995.



- 605 Lovelock, P.E.R.: A review of the tectonics of the northern Middle East region. *Geol. Mag.*,  
606 121, 577–587, Online ISSN: 1469-5081, 1984.
- 607 Nur, A.: Matsushiro, Japan, earthquake swarm: Confirmation of the dilatancy-fluid  
608 diffusion model, *Geology*, 2, 217–221, [https://doi.org/10.1130/0091-  
609 7613\(1974\)2%3C217:MJESCO%3E2.0.CO;2](https://doi.org/10.1130/0091-7613(1974)2%3C217:MJESCO%3E2.0.CO;2), 1974.
- 610 McKenzie, D.P.: Active tectonics of the Mediterranean Region, *Geophys. J. Int.*, 30, 109–  
611 185, <https://doi.org/10.1111/j.1365-246X.1972.tb02351.x>, 1972.
- 612 McKenzie, D.P.: The East Anatolian fault: a major structure in eastern Turkey. *Earth  
613 Planet Sc. Lett.*, 29, 189–193, [https://doi.org/10.1016/0012-821X\(76\)90038-8](https://doi.org/10.1016/0012-821X(76)90038-8), 1976.
- 614 Muehlberger, W.B. and Gordon, M.B.: Observations on the complexity of the East  
615 Anatolian fault, Turkey. *J. Struct Geol.*, 9, 899–903, [http://dx.doi.org/10.1016/0191-  
616 8141\(87\)90091-5](http://dx.doi.org/10.1016/0191-8141(87)90091-5), 1987.
- 617 Ouzounov, D., Pulinets, S., Davidenko, D., Rozhnoi, A., Solovieva, M., Fedun, V.,  
618 Dwivedi, B. N., Rybin, A., Kafatos, M., and Taylor, P.: Transient effects in atmosphere  
619 and ionosphere preceding the 2015 M7.8 and M7.3 Gorkha-Nepal earthquakes, *Front.  
620 Earth Sci.*, 9, <https://doi.org/10.3389/feart.2021.757358>, 2021.
- 621 Papadopoulos, G. A., Latoussakis, I., Daskalaki, E., Diakogianni, G., Fokaefs, A., Kolligri,  
622 M., Liadopoulou, K., Orfanogiannaki, K., and Pirentis, A.: The East Aegean Sea strong  
623 earthquake sequence of October–November 2005: lessons learned for earthquake  
624 prediction from foreshocks, *Nat. Hazards Earth Syst. Sci.*, 6, 895–901,  
625 <https://doi.org/10.5194/nhess-6-895-2006> , 2006.
- 626 Paudel, S.R., Banjara, S.P., Wagle, A., Freund, F.T.: Earthquake chemical precursors in  
627 groundwater: a review, *J. Seismol.*, 22, 1293–1314, [https://doi.org/10.1007/s10950-018-  
628 9739-8](https://doi.org/10.1007/s10950-018-9739-8), 2018.
- 629 Pérez, N. M., Hernández, P. A., Igarashi, G., Trujillo, I., Nakai, S., Sumino, H. and Wakita,  
630 H.: Searching and detecting earthquake geochemical precursors in CO<sub>2</sub>-rich  
631 groundwaters from Galicia, Spain, *Geochem J.*, 42, 75–83,  
632 <http://dx.doi.org/10.2343/geochemj.42.75> , 2008.
- 633 Perinçek, D. and Çemen, I.: The structural relationship between the East Anatolian and  
634 Dead Sea fault zones in southeastern Turkey, *Tectonophysics*, 172, 331–340,  
635 [http://dx.doi.org/10.1016/0040-1951\(90\)90039-B](http://dx.doi.org/10.1016/0040-1951(90)90039-B), 1990.
- 636 Rikitake, T.: Earthquake Precursors in Japan: Precursor Time and Detectability,  
637 *Tectonophysics*, 136, 265–282, [https://doi.org/10.1016/0040-1951\(87\)90029-1](https://doi.org/10.1016/0040-1951(87)90029-1) , 1987.
- 638 Rikitake, T.: Classification of earthquake precursors, *Tectonophysics*, 54, 293-309,  
639 [https://doi.org/10.1016/0040-1951\(79\)90372-X](https://doi.org/10.1016/0040-1951(79)90372-X), 1979.





- 640 Roeloffs, E.: Poroelastic techniques in the study of earthquake-related hydrologic  
641 phenomena, *Adv. Geophys.*, 37, 135–195, [https://doi.org/10.1016/S0065-](https://doi.org/10.1016/S0065-2687%2808%2960270-8)  
642 [2687%2808%2960270-8](https://doi.org/10.1016/S0065-2687%2808%2960270-8), 1996.
- 643 Rotstein, Y.: Counterclockwise rotation of the Anatolian block, *Tectonophysics*, 108, 71–  
644 91, [https://doi.org/10.1016/0040-1951\(84\)90155-0](https://doi.org/10.1016/0040-1951(84)90155-0), 1984.
- 645 Şaroğlu, F., Emre, O., Kuscu, I.: Active Fault map of Turkey (1:2 000 000 scale), General  
646 Directorate of Mineral Research and Exploration (MTA), Ankara, Turkey, 1992a
- 647 Şaroğlu, F., Emre, O., Kuscu, I.: The East Anatolian fault zone of Turkey. *Annales*  
648 *Tectonicae: International Journal of Structural Geology and Tectonics*, 6, 99–125 (Special  
649 Issue-Supplement to Volume VI), 1992b.
- 650 Scholz, R., Sykes, L. R. and Aggarwal, Y. P.: Earthquake prediction: A physical basis,  
651 *Science*, 181, 803–810, <https://www.science.org/doi/10.1126/science.181.4102.803>,  
652 1973.
- 653 Sengör, A. M. C. and Yılmaz, Y.: Tethyan evolution of Turkey: A plate tectonic approach,  
654 *Tectonophysics*, 75, 181– 241, [http://dx.doi.org/10.1016/0040-1951\(81\)90275-4](http://dx.doi.org/10.1016/0040-1951(81)90275-4), 1981.
- 655 Sengör, A. M. C., Görür, N. and Şaroğlu, F.: Strike-slip faulting and related basin  
656 formation in zones of tectonic escape: Turkey as a case study, in: *Strike-slip Deformation,*  
657 *Basin Formation, and Sedimentation*, edited by: Biddle, K. T. and Christie-Blick, N., *Soc.*  
658 *Econ. Pa*, 37, 227–264, 1985.
- 659 Seyis, C., İnan, S., Yalçın, M.N.: Major factors affecting soil radon emanation, *Nat.*  
660 *Hazards*, 114, 2139–2162, <http://link.springer.com/10.1007/s11069-022-05464-y>,  
661 2022.  
662 .
- 663 Sibson, R. H.: Implications of fault-valve behavior for rupture nucleation and recurrence,  
664 *Tectonophysics*, 211, 283–293, [https://doi.org/10.1016/0040-1951\(92\)90065-E](https://doi.org/10.1016/0040-1951(92)90065-E), 1992.
- 665 Sibson, R.H., Moore, J.M.M., Rankin, A.H.: Seismic pumping—a hydrothermal fluid  
666 transport mechanism, *J. Geol. Soc. London*, 131, 653–659,  
667 <https://doi.org/10.1144/gsjgs.131.6.0653>, 1975.
- 668 Skelton, A., Liljedahl-Claesson, L., Wästeby, N., Andrén, M., Stockmann, G., Sturkell, E.,  
669 et al.: Hydrochemical changes before and after earthquakes based on long-term  
670 measurements of multiple parameters at two sites in northern Iceland—a review, *J.*  
671 *Geophys. Res-Sol EA.*, 124, 2702–2720. <https://doi.org/10.1029/2018JB016757>, 2019.
- 672 Skelton, A., Andrén, M., Kristmannsdóttir, H., Stockmann, G., Mörth, C-M.,  
673 Sveinbjörnsdóttir, A., Jónsson, S., Sturkell, E., Guðrúnardóttir, H.R., Hjartarson, H.,  
674 Siegmund, H., Kockum, I.: Changes in groundwater chemistry before two consecutive  
675 earthquakes in Iceland. *Nat. Geosci.*, 7, 752-756. <http://dx.doi.org/10.1038/NGEO2250>,  
676 2014.



- 677 Sol, S., Meltzer, A., Bürgmann, R., van der Hilst, R. D., King, R., Chen, Z., Koons, P. O.,  
678 Lev, E., Liu, Y. P., Zeitler, P. K., Zhang, X., Zhang, J. and Zurek, B.: Geodynamics of the  
679 southern Tibetan Plateau from seismic anisotropy and geodesy, *Geology*, 35, 563–566,  
680 <https://doi.org/10.1130/G23408A.1>, 2007.
- 681 Soysal, H., Sipahioğlu, S., Kolçak, D. and Altınok, Y.: Historical earthquake catalogue of  
682 Turkey and surrounding area (2100 B.C. – 1900 A.D.), The Scientific and Technological  
683 Research Council of Turkey Technical Report, TBAG-341, 1981.
- 684 Sugisaki, R., Ito, T., Nagamine, K. and Kawabe, I.: Gas geochemical changes at mineral  
685 springs associated with the 1995 southern Hyogo earthquake (M = 7.2), Japan, *Earth  
686 Planet Sc. Lett.*, 139, 239–249, [https://doi.org/10.1016/0012-821X\(96\)00007-6](https://doi.org/10.1016/0012-821X(96)00007-6), 1996.
- 687 Sultankhodhaev, G. A.: International symposium on earthquake prediction, UNESCO,  
688 Paris 1979, 181-191, 1984.
- 689 Tansi, C., Tallarico, A., Iovine, G., Folino Gallo, M. and Falcone, G.: Interpretation of  
690 radon anomalies in seismotectonic and tectonic-gravitational settings: the southeastern  
691 Crati graben (Northern Calabria, Italy), *Tectonophysics*, 396, 181–193,  
692 <https://doi.org/10.1016/j.tecto.2004.11.008>, 2005.
- 693 Thomas, D.M., Cuff, K.E., Cox, M.E.: The association between ground gas radon  
694 variations and geologic activity in Hawaii, *J. Geophys. Res-Sol EA*, 91, 12186-12198,  
695 [https://ui.adsabs.harvard.edu/link\\_gateway/1986JGR....9112186T/doi:10.1029/JB091iB  
696 12p12186](https://ui.adsabs.harvard.edu/link_gateway/1986JGR....9112186T/doi:10.1029/JB091iB12p12186). 1986.
- 697 Toutain, J. P., Munoz, M., Poitrasson, F. and Lienard, F.: Springwater chloride ion  
698 anomaly prior to a ML = 5.2 Pyrenean earthquake, *Earth Planet Sc. Lett.*, 149, 113–119.  
699 [https://doi.org/10.1016/S0012-821X\(97\)00066-6](https://doi.org/10.1016/S0012-821X(97)00066-6), 1997.
- 700 Tsunogai, U. and Wakita, H.: Precursory chemical changes in groundwater: Kobe  
701 earthquake, Japan, *Science*, 269, 61-63, <https://doi.org/10.1126/science.269.5220.61>,  
702 1995.
- 703 Turcotte, W. L.: Earthquake prediction, *Annu. Rev. Earth Pl. Sc.*, 19, 263 – 281,  
704 <https://doi.org/10.1146/annurev.ea.19.050191.001403>, 1991.
- 705 Usta, D., Ateş, Ş., Beyazpınar, M., Kanar, F., Yıldız, H., Uçar, L., İsmail Akça, İ., Tufan,  
706 E. and Örtlek, A. T.: New data on the stratigraphy of the central and northern Amonous  
707 mountains (Osmaniye - Gaziantep - K. Maraş). *Bulletin of the Turkish Association of  
708 Petroleum Geologists*, 27, 57-98, 2015.
- 709 Usta, D., Ateş, Ş., Kanar, F., Beyazpınar, M., Uçar, L., Yıldız, H., Tufan, E., Akça, İ.,  
710 Örtlek, A. T.: Doğu Toroslar'ın jeolojisi ve jeodinamik evrimi projesi (K.Maras, Osmaniye,  
711 Gaziantep, Adana, Hatay). General Directorate of Minerals and Exploration of Turkey  
712 (MTA) unpublished Report No 13568, 494 pages, Ankara (in Turkish), 2017.



- 713 Uyeda, S., Nagao, T. and Kamogawa, M.: Short-term earthquake prediction: Current  
714 status of seismo-electromagnetics, *Tectonophysics*, 470, 205–213.  
715 <https://doi.org/10.1016/j.tecto.2008.07.019>, 2008.
- 716 Wakita, H.: Geochemical challenge to earthquake prediction, *P. Natl. Acad. Sci. USA*, 93,  
717 9, 3781-3786, DOI: 10.1073/pnas.93.9.3781, 1996.
- 718 Wakita, H., Nakamura, Y. and Sano, Y.: Short-term and intermediate-term geochemical  
719 precursors, *Pure and Applied Geophysics*, 125, 267–278,  
720 <https://doi.org/10.1007/BF00878999>, 1988.
- 721 Wang, C-Y. and Manga, M.: *Water and Earthquakes. Lecture Notes in Earth System*  
722 *Sciences*. Springer, 307 pp. <https://doi.org/10.1007/978-3-030-64308-9>. 2021.
- 723 Westaway, R. and Arger, J.: The Gölbasi basin, southeastern Turkey: a complex  
724 discontinuity in a major strike-slip fault zone, *J. Geol. Soc. London*, 153, 729 – 744,  
725 <https://doi.org/10.1144/gsjgs.153.5.0729>, 1996.
- 726 Xiang, Y. and Peng, S.: Hydrochemical and stable isotopes ( $\delta^2\text{H}$  and  $\delta^{18}\text{O}$ ) changes  
727 of groundwater from a spring induced by local earthquakes, Northwest China. *Frontiers*  
728 *in Earth Sciences*, 09 January 2023. *Solid Earth Geophysics*.  
729 <https://doi.org/10.3389/feart.2022.1100068>, 2023.
- 730 Virk, H.S., and Singh, B.: Radon anomalies in soil gas and groundwater as earthquake  
731 precursor phenomena, *Tectonophysics*, 227, 215-224, [https://doi.org/10.1016/0040-](https://doi.org/10.1016/0040-1951(93)90096-3)  
732 [1951\(93\)90096-3](https://doi.org/10.1016/0040-1951(93)90096-3), 1993.
- 733 Yönlü, Ö., Altunel, E. and Karabacak, V.: Geological and geomorphological evidence for  
734 the southwestern extension of the East Anatolian Fault Zone, Turkey. *Earth Planet Sc.*  
735 *Lett.*, 469, 1–14, <http://dx.doi.org/10.1016/j.epsl.2017.03.034>, 2017.
- 736 Yu, H., Liu, L., Ma, Y., Yan, R., Liu, J., Ma, Y., Li, Z., Zhang, X., Zhao, J., Yu, C.: Observed  
737 hydrological changes associated with active tectonic blocks before three consecutive  
738 earthquakes in Qinghai, China *Scientific Reports* 13, 8988.  
739 <https://doi.org/10.1038/s41598-023-36274-2>, 2023.
- 740 Zeyrek, M., Ertekin, K., Kacmaz, S., Seyis, C., İnan, S.: An ion chromatography method  
741 for the determination of major anions in geothermal water samples, *Geostand. Geoanal.*  
742 *Res.*, 34, 67-77, <http://dx.doi.org/10.1111/j.1751-908X.2009.00020.x>, 2010.  
743
